# Supplementary material for: Public health relevance of medicines developed under paediatric legislation in Europe and the USA: a systematic mapping study
Source: PubMed Central journal article supplement — BMJ Paediatr Open. 2024 Apr 2;8(1):e002455. doi: 10.1136/bmjpo-2023-002455 (PMC10989171; doi:10.1136/bmjpo-2023-002455), 2024-04-02
Supplement: bmjpo-2023-002455.draft_revisions.pdf [file bmjpo-2023-002455.draft_revisions.pdf]

# BMJ Paediatrics Open

BMJ Paediatrics Open is committed to open peer review. As part of this commitment we make the peer review history of every article we publish publicly available.

When an article is published we post the peer reviewers' comments and the authors' responses online. We also post the versions of the paper that were used during peer review. These are the versions that the peer review comments apply to.

The versions of the paper that follow are the versions that were submitted during the peer review process. They are not the versions of record or the final published versions. They should not be cited or distributed as the published version of this manuscript.

BMJ Paediatrics Open is an open access journal and the full, final, typeset and author-corrected version of record of the manuscript is available on our site with no access controls, subscription charges or pay-per-view fees (<http://bmjpaedsopen.bmj.com>).

If you have any questions on BMJ Paediatrics Open's open peer review process please email [info.bmjpo@bmj.com](mailto:info.bmjpo@bmj.com)



# BMJ Paediatrics Open

## Public health relevance of medicines developed under paediatric legislation in Europe and the United States: a systematic mapping study

|                               |                                                                                                                                                                                                                                                           |
|-------------------------------|-----------------------------------------------------------------------------------------------------------------------------------------------------------------------------------------------------------------------------------------------------------|
| Journal:                      | <i>BMJ Paediatrics Open</i>                                                                                                                                                                                                                               |
| Manuscript ID                 | bmjpo-2023-002455                                                                                                                                                                                                                                         |
| Article Type:                 | Original research                                                                                                                                                                                                                                         |
| Date Submitted by the Author: | 21-Dec-2023                                                                                                                                                                                                                                               |
| Complete List of Authors:     | Volodina, Anna; Heidelberg University, Heidelberg Institute of Global Health<br>Jahn, Albrecht; Heidelberg University, Heidelberg Institute of Global Health<br>Jahn, Rosa; University Hospital Heidelberg, Section for Health Equity Studies & Migration |
| Keywords:                     | Therapeutics                                                                                                                                                                                                                                              |
|                               |                                                                                                                                                                                                                                                           |

SCHOLARONE™  
Manuscripts

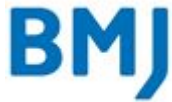

I, the Submitting Author has the right to grant and does grant on behalf of all authors of the Work (as defined in the below author licence), an exclusive licence and/or a non-exclusive licence for contributions from authors who are: i) UK Crown employees; ii) where BMJ has agreed a CC-BY licence shall apply, and/or iii) in accordance with the terms applicable for US Federal Government officers or employees acting as part of their official duties; on a worldwide, perpetual, irrevocable, royalty-free basis to BMJ Publishing Group Ltd ("BMJ") its licensees and where the relevant Journal is co-owned by BMJ to the co-owners of the Journal, to publish the Work in this journal and any other BMJ products and to exploit all rights, as set out in our [licence](#).

The Submitting Author accepts and understands that any supply made under these terms is made by BMJ to the Submitting Author unless you are acting as an employee on behalf of your employer or a postgraduate student of an affiliated institution which is paying any applicable article publishing charge ("APC") for Open Access articles. Where the Submitting Author wishes to make the Work available on an Open Access basis (and intends to pay the relevant APC), the terms of reuse of such Open Access shall be governed by a Creative Commons licence – details of these licences and which [Creative Commons](#) licence will apply to this Work are set out in our licence referred to above.

Other than as permitted in any relevant BMJ Author's Self Archiving Policies, I confirm this Work has not been accepted for publication elsewhere, is not being considered for publication elsewhere and does not duplicate material already published. I confirm all authors consent to publication of this Work and authorise the granting of this licence.

## Public health relevance of medicines developed under paediatric legislation in Europe and the United States: a systematic mapping study

Anna Volodina<sup>1</sup>, Albrecht Jahn<sup>1</sup>, Rosa Jahn<sup>2</sup>

**Corresponding author details:** Anna Volodina, Heidelberg Institute of Global Health, Heidelberg University, Im Neuenheimer Feld 130.3, 69120 Heidelberg, Germany. Email: [anna.volodina@uni-heidelberg.de](mailto:anna.volodina@uni-heidelberg.de)

<sup>1</sup> Heidelberg Institute of Global Health, Heidelberg University, Heidelberg, Germany.

<sup>2</sup> Section for Health Equity Studies & Migration, University Hospital Heidelberg, Heidelberg, Germany

[Anna.Volodina@uni-heidelberg.de](mailto:Anna.Volodina@uni-heidelberg.de)

[Albrecht.Jahn@uni-heidelberg.de](mailto:Albrecht.Jahn@uni-heidelberg.de)

[RosaHelene.Jahn@med.uni-heidelberg.de](mailto:RosaHelene.Jahn@med.uni-heidelberg.de)

Word count: 2845 out of max 2500

Table count: 6

### Abstract – 298 out of max 300 words

#### *Background*

Legislation in the European Union (EU) and the United States (US) promoting the development of paediatric medicines has contributed to new treatments for children. This study explores how such legislation responds to paediatric health needs in different country settings and globally, and whether it should be considered for a wider implementation.

#### *Methods*

195 medicines developed under paediatric legislation in the EU and US were sampled from publicly available regulatory databases. Of these, 187 medicines could be systematically mapped to the burden of the target disease for six study countries (Australia, Brazil, Canada, Kenya, Russia, South Africa) and globally, using Disability Adjusted Life Years (DALYs). In addition, all medicines were screened for inclusion on the World Health Organisation Model List of Essential Medicines (EML) and the EML for children under 13 years (EMLc).

#### *Results*

We found that medicines developed under paediatric legislation were disproportionately focused on non-communicable diseases, which represented 68% of medicines and 21% of global paediatric DALYs. On the other hand, we found 28% of medicines for communicable, maternal, neonatal and nutritional disorders, representing 73% of global DALYs. Neonatal disorders, and malaria were mapped with 2 medicines, tuberculosis and neglected tropical diseases with none. The gap between medicines and paediatric DALYs was greater in countries with lower income. Still, 34% of medicines are included in the EMLc and 48% in the EML.

#### *Conclusions*

Paediatric policies in the EU and US are only partially responsive to paediatric health needs. To be considered for wider implementation, paediatric incentives and obligations should be more targeted towards paediatric health needs. International harmonisation of legislation and alignment with global research priorities could further strengthen its impact on child health and support ongoing efforts to improve access to medicines. Furthermore, efforts should be made to ensure global access to authorised paediatric medicines.

### What is already known on this topic

Paediatric legislation in Europe and the United States has stimulated research and development of medicines for children. According to impact assessments, the availability of paediatric medicines in these countries has benefited. However, there are no studies to assess the potential impact on the childhood burden of disease beyond these countries and globally.

### What this study adds

While the resulting treatments are not well aligned with the burden of disease profile globally and in low- and middle-income countries, there is a positive effect for some diseases and a substantial contribution to the WHO essential medicines lists. To achieve a better public health impact paediatric legislation should be expanded internationally, harmonised and tailored to global research priorities in children.

### How this study might affect research, practice or policy

The study informs ongoing and future regulatory reform processes and especially the current revision of the EU Paediatric Legislation, to support the development of more impactful policies.

**Keywords:** access to medicines, paediatric legislation, unmet needs, burden of disease

### Introduction

Access to medicines remains a key priority of the United Nations Sustainable Development Goals (SDGs) aiming to secure healthy well-being (1). The SDGs recognise the need to promote research and development (R&D) of missing medicines and vaccines, especially for low- and middle-income countries (LMICs) (2). Children are particularly affected by the continuing lack of R&D and quality, safe and effective medicines globally (3-5). To improve paediatric care, the European Union (EU) and the United States (US) introduced paediatric medicines legislation in 2007 and 1997, respectively. This legislation is based on a combination of obligations and incentives. Pharmaceutical companies are required to conduct paediatric investigations for novel medicines including those intended for use in adults, receiving patent extensions in return (6-7). Research has shown that there has been an increase in paediatric labelling and formulations in both regions since the legislation was introduced (8-10). These findings suggests that similar legislation may be used to improve paediatric medicines availability and access in other regions.

However, one concern regarding EU/US paediatric legislation is that the paediatric R&D it encourages may not meet paediatric needs, thus limiting its practical benefits for paediatric care (9). Exploring the responsiveness of paediatric legislation to the health needs of children globally and in different countries is therefore crucial for understanding its potential for wider implementation. To our knowledge, there have been no systematic comparisons between paediatric medicines and paediatric needs in relation to paediatric legislation so far. Addressing this gap, we map the spectrum of novel paediatric medicines developed under paediatric legislation in the EU and US to the burden of the target diseases in six countries of diverse income levels (Australia, Brazil, Canada, Kenya, Russia, South Africa) and globally. As a measures of disease burden, we use Disability Adjusted Life Years (DALYs), which quantify the loss of health by combining years of life lost plus years lived with disability (11). In addition, we assess the inclusion of the studied medicines in the World Health Organisation (WHO) Model List of Essential Medicines (EML) as an indicator of their relevance to paediatric health needs

1  
2  
3 relative to existing medical products. Based on this assessment, the paper examines the role of  
4 paediatric legislation for paediatric care in the international context.  
5

## 6 **Methods**

### 7 *Study context*

8  
9  
10 This analysis is part of a larger study of paediatric regulatory policies and their implications for universal  
11 access. Australia, Brazil, Canada, Kenya, Russia and South Africa were selected for analysis to account  
12 for differences in regulatory systems, economic development, and due to data collection  
13 considerations as discussed in the previous publication (12).  
14

### 15 *Sample of medicines developed under paediatric legislation*

16  
17 This study analyses a sample of medicines from the European Medicines Agency (EMA) and Food and  
18 Drug Administration (FDA), as described in detail elsewhere (12). In summary, paediatric medicines  
19 approved in the EU or US between 2007 and 2018, and not withdrawn for safety reasons were  
20 considered for inclusion. For this paper we reviewed 158 paediatric investigation plans (PIPs) from the  
21 EU. Deviating from the original sampling process, 22 additional EU PIPs were excluded due to absence  
22 of paediatric indication and 9 were aggregated for analysis as they belonged to the same medicine.  
23 This resulted in a total of 127 EU medicines sampled. The US sample remained unchanged and included  
24 a random sample of 22% of all paediatric labels (12). The total sample was 195 medicines, 127 from  
25 the EU and 68 from the US.  
26  
27

### 28 *Indicators of the public health relevance*

29  
30 To assess the responsiveness of the EU/US paediatric legislation to paediatric health needs, we 1)  
31 mapped the sampled medicines to the DALYs of the target condition(s) and 2) reviewed their EML  
32 status.  
33

34  
35 The burden of disease assessment was based on DALY data from the 2019 Global Burden of Diseases  
36 (GBD) results published by the Institute for Health Metrics and Evaluation (IHME) (13). The GBD results  
37 are organised hierarchically with mutually exclusive diseases or conditions that cause death or  
38 disability referred to as “DALY cause”. There are 4 hierarchical levels of DALY causes, starting with  
39 three categories at the first level: (1) communicable, maternal, neonatal, and nutritional causes  
40 (CMNN); (2) non-communicable diseases (NCDs); and (3) Injuries. The fourth level includes individual  
41 conditions or pooled categories as the most detailed causes. As example, see the levels for “typhoid  
42 fever” provided in the “GBD concepts and terms defined”: “Level 1: CMNN; Level 2: enteric infections;  
43 Level 3: typhoid and paratyphoid; Level 4: typhoid fever” (14).  
44  
45

46  
47 The responsiveness to paediatric health needs considering existing treatments was assessed by  
48 reviewing medicines’ status in the WHO EML and the and EML for children under 13 years of age  
49 (EMLc). Both EMLs have a core and a complementary list, representing the needs of basic and  
50 specialised healthcare systems respectively (15).  
51

### 52 *Data analysis*

53  
54 The sampled medicines were matched to the International Classification of Disease code  
55 corresponding to the target diseases using the online electronic International Statistical Classification  
56 of Diseases and Related Health Problems 10<sup>th</sup> Revision (ICD-10) (16). Code matching was based on the  
57 approved indication with the ICD-10 code specification up to the first three or four characters.  
58 Medicines with more than one indication were matched with multiple ICD-10 codes.  
59  
60

The codes obtained were mapped to the most detailed DALY causes in children (0 – 14 years, total DALYs and rate) for each country and globally. Mapping was done using the online IHME tool (17). The mapping process is shown in Figure 1. The mapping results to the most detailed DALY causes can be found in supplement 1.

For analysis and reporting, the mapping results were aggregated to DALY cause level 2. For relevant compound level 2 categories, level 3 DALY causes were used instead to ensure sufficient detail (see Table 1).

**Table 1: Overview of compound level 2 DALYS causes and corresponding Level 3 DALYS causes utilised for mapping**

| Compound Level 2 DALY causes                            | Level 3 DALY causes utilised for mapping                                                                                                                                                                                                    |
|---------------------------------------------------------|---------------------------------------------------------------------------------------------------------------------------------------------------------------------------------------------------------------------------------------------|
| Other non-communicable diseases                         | congenital birth defects; urinary diseases and male infertility; gynaecological diseases; sudden infant death syndrome; oral disorders; endocrine, metabolic, blood and immune disorders (“EMBI”); hemoglobinopathies & haemolytic anaemias |
| Respiratory infections and tuberculosis (TB)            | Respiratory infections excl. TB;<br>Tuberculosis                                                                                                                                                                                            |
| Neglected tropical diseases (NTDs) and malaria          | NTDs excl. malaria;<br>Malaria                                                                                                                                                                                                              |
| HIV/AIDs and other sexually transmitted diseases (STDs) | STDs excl. HIV/AIDS;<br>HIV/AIDS                                                                                                                                                                                                            |
| Maternal and neonatal disorders                         | Maternal disorders;<br>Neonatal disorders                                                                                                                                                                                                   |

Results were calculated as percentages (proportions) according to the rounding rules and organised according to the level 1 DALY causes (Tables 2-4). The colour code was generated automatically using the XLS function of conditional formatting.

Mutually exclusive thematic categories were developed for medicines mapped with <0,05 DALYs to distinguish between global or national lack of measurable burden (Table 5).

The INN search of the full sample was performed in the 23<sup>rd</sup> EML and the 9<sup>th</sup> EMLc. To account for the difference in the paediatric population between the EMLc (up to 13 years) and paediatric legislation (up to 18 years), and to capture essential medicines for adolescents, we included the EML in our review. When the EMLs included the Anatomical Therapeutic Chemical (ATC) subgroup as a therapeutic alternative, it was searched using the online ATC database (18). Assignment to the core or the complementary list was recorded.

Descriptive tables, figures and statistics were generated using MS Excel.

### Patient and Public involvement

Patients or the public were not involved in the design, or conduct, or reporting, or dissemination plans of our research.

### Results:

#### *Burden of disease mapping*



The 195 medicines were matched with 101 ICD-10 codes, allowing a DALY mapping for 187 medicines. For 3 ICD-10 codes no DALY cause could be found in the online DALY tool, and 8 medicines were excluded from the analysis (supplement 2). In total, 61 (21%) of the 293 most detailed DALY causes were mapped to at least one medicine in the sample. A total of 128 medicines (68%) were mapped to NCDs which captured 21% of the global disease burden (30 031 DALYs). 52 medicines (28%) were mapped to CMNN diseases, which captured 73% of the global disease burden (21 915 DALYs). Two medicines with multiple indications were mapped to both, communicable and non-communicable disease groups. And lastly, 9 medicines (5%) were mapped to injuries, which captured 6% (1 783 DALYs) of the global disease burden.

In the following, we present the results of the systematic mapping of medicines to GBD DALYs by the three level 1 causes CMNN, NCDs and Injuries in order of global disease burden (see Tables 2-4).

Table 2 presents the mapping results for CMNN diseases and includes 52 medicines (28%) of all mapped medicines, of which 7 were mapped to more than one cause. The CMNN DALY cause with the highest burden across all countries and globally was “neonatal disorders” with 8883 global CMNN DALYs (41% of all respective DALYs). It was mapped to 2 (2%) CMNN medicines, both Streptococcus pneumoniae vaccines. Malaria with 1820 (8%) global CMNN DALYs was mapped to 2 medicines, tuberculosis with 311 (1%) global CMNN DALYs and neglected tropical diseases with 290 (1%) global CMNN DALYs was mapped to none. Overall, “other infectious diseases”, “HIV/AIDS” and “respiratory Infections excl. TB” were each mapped to 15 or more medicines, by far the highest number. “Other infectious diseases” with 1952 (9%) global CMNN DALYs was mapped to 19 (37%) CMNN medicines. 12 of them were for hepatitis B or C, bacteraemia, cytomegalovirus and invasive fungal infections, 7 were multicomponent childhood vaccines.

The Table 2 also shows that middle-income countries bear a higher burden of infectious diseases, nutritional deficiencies, and neonatal disorders.

**Table 2. Medicines for children (N=52) mapped to communicable diseases, maternal, neonatal disorders and nutritional (CMNN) diseases, with corresponding disease burden ranked by global burden.**

| DALY cause                      | DALYs per 100 000, 0-14 years, 2019 (% of total burden of DALYs attributed to CMNN diseases) |           |            |           |            |            |           | Mapped Medicines, n (% of CMNN mapped medicines) |
|---------------------------------|----------------------------------------------------------------------------------------------|-----------|------------|-----------|------------|------------|-----------|--------------------------------------------------|
|                                 | AU                                                                                           | BR        | CA         | KE        | RU         | SA         | Global    |                                                  |
| Neonatal disorders*             | 1139 (69)                                                                                    | 5907 (66) | 1543 (76)  | 9000 (34) | 1456 (52)  | 10669 (45) | 8883 (41) | 2 (4)                                            |
| Respiratory infections excl. TB | 221 (13)                                                                                     | 1199 (13) | 226 (11)   | 3330 (13) | 543 (20)   | 2687 (11)  | 3360 (15) | 16 (31)                                          |
| Enteric infections              | 76 (5)                                                                                       | 566 (6)   | 139 (7)    | 5238 (20) | 228 (8)    | 2550 (11)  | 3241 (15) | 6 (12)                                           |
| Other infectious diseases       | 81 (5)                                                                                       | 300 (3)   | 71 (3)     | 1856 (7)  | 231 (8)    | 1474 (6)   | 1952 (9)  | 19 (37)                                          |
| Malaria*                        | < 0.05 (0)                                                                                   | 7 (0)     | < 0.05 (0) | 2450 (9)  | < 0.05 (0) | 40 (0)     | 1820 (8)  | 2 (4)                                            |
| Nutritional deficiencies        | 117 (7)                                                                                      | 601 (7)   | 53 (3)     | 1705 (6)  | 135 (5)    | 1155 (5)   | 1344 (6)  | 1 (2)                                            |
| STDs excl. HIV                  | 1 (0)                                                                                        | 37 (0)    | < 0.05 (0) | 420 (2)   | 2 (0)      | 1321 (6)   | 371 (2)   | 2 (2)                                            |

|                    |               |            |               |             |               |               |            |         |
|--------------------|---------------|------------|---------------|-------------|---------------|---------------|------------|---------|
| HIV/AIDS*          | 2<br>(0)      | 79<br>(1)  | 4<br>(0)      | 1875<br>(7) | 150<br>(5)    | 3072<br>(13)  | 338<br>(2) | 15 (29) |
| Tuberculosis*      | 1<br>(0)      | 26<br>(0)  | 1<br>(0)      | 220<br>(1)  | 16<br>(1)     | 621<br>(3)    | 311<br>(1) | 0 (0)   |
| NTDs excl Malaria  | 13<br>(1)     | 171<br>(2) | 4<br>(0)      | 241<br>(1)  | 16<br>(1)     | 96<br>(0)     | 290<br>(1) | 0 (0)   |
| Maternal disorders | < 0.05<br>(0) | 3<br>(0)   | < 0.05<br>(0) | 5<br>(0)    | < 0.05<br>(0) | < 0.05<br>(0) | 4<br>(0)   | 0 (0)   |
| Total burden       | 1651          | 8 897      | 2 041         | 26 340      | 2 777         | 23 685        | 21 915     |         |



Lower DALYs                      Higher DALYs                      Fewer medicines                      More medicines

All DALY causes aggregated at the second level unless marked with \*  
 \* - DALY causes aggregated to the third level

DALY Source: Institute for Health Metrics and Evaluation. Used with permission. All rights reserved.

Table 3 presents the DALY mapping for NCDs, which includes 128 (68%) of medicines, of which 9 are mapped to more than one cause. The burden of disease distribution did not reveal striking differences between the countries or globally. The DALY cause with the highest burden was “congenital birth defects” with 2394 (38%) NCD DALYs globally. It was mapped to 2 medicines for paediatric glaucoma. Several high-burden DALY causes were well represented in the sample, such as “skin and subcutaneous diseases” with 627 (10%) global NCD DALYs and 13 (10%) NCD treatments, “neurological disorders” with 443 (7%) global NCD DALYs and 15 (12%) NCD treatments. However, most NCD medicines (23%) were mapped to the DALY cause “EMBI”, which accounted for 3% NCD DALYs globally. The most targeted “EMBI” indications were anaemia, rare coagulation and metabolic disorders.

For several NCD DALY causes at level 2 and 3, medicines were indicated for a few conditions. For example, in “musculoskeletal disorders” 7 out of 8 medicines were for juvenile arthritis. In “chronic respiratory diseases” 8 medicines were for allergic rhinitis and the remaining 5 for asthma. “Diabetes and kidney diseases” was mapped exclusively to insulins.

**Table 3. Medicines for children mapped to non-communicable diseases (N=128) with corresponding disease burden ranked by global burden.**

| DALY cause                   | DALYs per 100 000, 0-14 years, 2019 (% of total burden of DALYs attributed to NCD) |              |             |              |              |              |              | Mapped Medicines, n (% of mapped NCD medicines) |
|------------------------------|------------------------------------------------------------------------------------|--------------|-------------|--------------|--------------|--------------|--------------|-------------------------------------------------|
|                              | AU                                                                                 | BR           | CA          | KE           | RU           | SA           | Global       |                                                 |
| Congenital birth defects*    | 720<br>(18)                                                                        | 3077<br>(41) | 809<br>(21) | 1734<br>(34) | 1108<br>(27) | 1653<br>(35) | 2394<br>(38) | 2 (2)                                           |
| Skin & subcutaneous diseases | 715<br>(18)                                                                        | 735<br>(10)  | 759<br>(20) | 601<br>(12)  | 768<br>(19)  | 504<br>(11)  | 627<br>(10)  | 13 (10)                                         |
| Mental disorders             | 822<br>(21)                                                                        | 766<br>(10)  | 625<br>(16) | 512<br>(10)  | 491<br>(10)  | 516<br>(11)  | 587<br>(9)   | 8 (6)                                           |
| Neurological disorders       | 317<br>(8)                                                                         | 685<br>(9)   | 330<br>(8)  | 382<br>(8)   | 314<br>(8)   | 391<br>(8)   | 433<br>(7)   | 15 (12)                                         |
| Neoplasms                    | 220<br>(6)                                                                         | 484<br>(7)   | 251<br>(6)  | 295<br>(6)   | 308<br>(8)   | 173<br>(4)   | 426<br>(7)   | 10 (8)                                          |

|                                                |             |            |            |            |            |            |             |         |
|------------------------------------------------|-------------|------------|------------|------------|------------|------------|-------------|---------|
| Digestive diseases                             | 42<br>(1)   | 195<br>(3) | 54<br>(1)  | 221<br>(4) | 115<br>(3) | 161<br>(3) | 284<br>(4)  | 10 (8)  |
| Hemoglobinopathies & hemolytic anemias*        | 12<br>(0)   | 79<br>(1)  | 8<br>(0)   | 189<br>(4) | 22<br>(1)  | 34<br>(1)  | 280<br>(4)  | 3 (2)   |
| Chronic respiratory disease                    | 479<br>(12) | 461<br>(6) | 326<br>(8) | 273<br>(5) | 173<br>(4) | 340<br>(7) | 267<br>(4)  | 13 (10) |
| Cardiovascular diseases                        | 46<br>(1)   | 222<br>(3) | 59<br>(2)  | 187<br>(4) | 76<br>(2)  | 159<br>(3) | 233<br>(4)  | 7 (5)   |
| Endocrine, metabolic, blood, immune disorders* | 167<br>(4)  | 161<br>(2) | 134<br>(3) | 79<br>(2)  | 154<br>(4) | 186<br>(4) | 159<br>(3)  | 29 (23) |
| Sense organ diseases                           | 104<br>(3)  | 147<br>(2) | 72<br>(2)  | 196<br>(4) | 133<br>(3) | 197<br>(4) | 157<br>(2)  | 12 (9)  |
| Sudden infant death syndrome*                  | 102<br>(3)  | 45<br>(1)  | 68<br>(2)  | 87<br>(2)  | 102<br>(3) | 135<br>(3) | 125<br>(2)  | 0 (0)   |
| Musculoskeletal disorders                      | 126<br>(3)  | 161<br>(2) | 218<br>(6) | 80<br>(2)  | 160<br>(4) | 74<br>(2)  | 123<br>(2)  | 8 (6)   |
| Diabetes and kidney disease                    | 25<br>(1)   | 92<br>(1)  | 39<br>(1)  | 79<br>(2)  | 61<br>(2)  | 93<br>(2)  | 122<br>(2)  | 5 (4)   |
| Oral disorders*                                | 50<br>(1)   | 55<br>(1)  | 50<br>(1)  | 52<br>(1)  | 57<br>(1)  | 52<br>(1)  | 54<br>(1)   | 1 (1)   |
| Urinary diseases and male infertility*         | 8<br>(0)    | 52<br>(1)  | 9<br>(0)   | 24<br>(0)  | 14<br>(0)  | 11<br>(0)  | 35<br>(0,5) | 1 (1)   |
| Gynecological diseases*                        | 22<br>(1)   | 24<br>(0)  | 23<br>(1)  | 25<br>(0)  | 22<br>(1)  | 22<br>(1)  | 24<br>(0,3) | 1 (1)   |
| Substance use disorders                        | 8<br>(0)    | 5<br>(0)   | 13<br>(0)  | 2<br>(0)   | 4<br>(0)   | 2<br>(0)   | 3<br>(0)    | 0 (0)   |
| Total burden                                   | 3 985       | 7 446      | 3 847      | 5 018      | 4 082      | 4 704      | 6 333       |         |



Lower DALYs                      Higher DALYs                      Fewer medicines                      More medicines

All DALY causes aggregated at the second level unless marked with \*

\* - DALY causes aggregated to the third level

DALY Source: Institute for Health Metrics and Evaluation. Used with permission. All rights reserved.

Table 4 shows the mapping results for the level 1 DALY group “Injuries”, which was mapped with 9 (5%) of all mapped medicines. 8 medicines addressed complications of medical treatment and were mapped to “unintentional injuries”. One medicine in the “self-harm and interpersonal violence” was indicated to prevent organ transplant rejection. The DALY distribution for injuries was higher in the middle-income countries.

**Table 4. Medicines for children (N=9) mapped to injuries with corresponding disease burden ranked by global burden.**

| DALY cause             | DALYs per 100 000, 0-14 years, 2019 (% of total burden of DALYs attributed to Injuries) |             |             |             |             |             |              | Mapped Medicines, n (% of injury mapped medicines) |
|------------------------|-----------------------------------------------------------------------------------------|-------------|-------------|-------------|-------------|-------------|--------------|----------------------------------------------------|
|                        | AU                                                                                      | BR          | CA          | KE          | RU          | SA          | Global       |                                                    |
| Unintentional injuries | 574<br>(74)                                                                             | 838<br>(56) | 308<br>(57) | 659<br>(65) | 851<br>(67) | 923<br>(51) | 1107<br>(62) | 8 (89)                                             |

|                                      |             |             |             |             |             |             |             |        |
|--------------------------------------|-------------|-------------|-------------|-------------|-------------|-------------|-------------|--------|
| Transport injuries                   | 130<br>(17) | 371<br>(25) | 143<br>(26) | 217<br>(22) | 258<br>(20) | 555<br>(31) | 437<br>(25) | 0 (0)  |
| Self-harm and interpersonal violence | 70<br>(9)   | 279<br>(19) | 90<br>(17)  | 133<br>(13) | 171<br>(13) | 321<br>(18) | 240<br>(13) | 1 (11) |
| Total burden                         | 774         | 1488        | 541         | 1009        | 1280        | 1799        | 1783        |        |



All DALY causes aggregated at the second level

DALY Source: Institute for Health Metrics and Evaluation. Used with permission. All rights reserved.

In total, 28 medicines were mapped to DALY causes at the most detailed level that had a negligible burden of disease (< 0.05 DALYs) (see Table 5). 18 of these medicines targeted conditions uncommon in children in all studied countries and globally. These were either generally rare diseases (e.g., rare tumour), diseases that primarily affect the adult population but are uncommon in children (e.g., hypertension), and human papilloma virus vaccines.

10 medicines were mapped to diseases with a lack of measurable burden in some countries, namely in Australia and Canada.

**Table 5. Medicines (N=28) for conditions with < 0.05 DALYs (0-14 years) with thematic categories**

| Thematic category                              | Paediatric indication                                        | Medicines with respective indication, n |
|------------------------------------------------|--------------------------------------------------------------|-----------------------------------------|
| No measurable burden in all studied countries  | Hypertension                                                 | 6                                       |
|                                                | Type II diabetes mellitus                                    | 5                                       |
|                                                | HPV infection                                                | 2                                       |
|                                                | Immediate reduction of blood pressure in hypertensive crisis | 1                                       |
|                                                | Multiple sclerosis                                           | 1                                       |
|                                                | Subependymal giant cell astrocytoma                          | 1                                       |
|                                                | Infantile haemangioma                                        | 1                                       |
| No measurable burden in some studied countries | Heavy menstrual bleeding                                     | 1                                       |
|                                                | Poliomyelitis                                                | 4                                       |
|                                                | Diphtheria                                                   | 4                                       |
|                                                | Tetanus                                                      | 4                                       |
|                                                | Treatment or prevention of hepatitis B                       | 6                                       |
|                                                | Malaria                                                      | 2                                       |
| Chronic hepatitis C                            | 1                                                            |                                         |

#### WHO EMLs review results

Of all 195 sampled medicines 67 (34%) were found in the EMLc and 93 (48%) in the WHO EML (see Table 6), with most medicines included in the core lists. The largest groups were childhood and

influenza vaccines, antivirals and antifungals, human immunoglobulins, medicines for blood disorders, and antiretrovirals. Of the 26 medicines included only in the EML, 7 were for adolescent use for mental disorders, emergency contraception or HIV/AIDS pre-exposure prophylaxis.

**Table 6. WHO Essential medicines list inclusion of sampled medicines for children (N=195)**

| WHO List inclusion                             | Number of medicines, n (%) |
|------------------------------------------------|----------------------------|
| <b>Medicines included in the EMLc</b>          | <b>67 (34)</b>             |
| Out of them:                                   |                            |
| • Medicines in the <i>core list</i>            | <b>45</b>                  |
| Of these, included as therapeutic alternatives | <b>11</b>                  |
| • Medicines in the <i>complementary list</i>   | <b>22</b>                  |
| Of these, included as therapeutic alternatives | <b>5</b>                   |
|                                                |                            |
| <b>Medicines included in the EML</b>           | <b>93 (48)</b>             |
| Out of them:                                   |                            |
| • Medicines in the <i>core list</i>            | 67                         |
| Of these, included as therapeutic alternatives | 22                         |
| • Medicines in the <i>complementary list</i>   | 26                         |
| Of these, included as therapeutic alternatives | 7                          |

## Discussion

Our study shows that the sampled medicines developed under paediatric legislation in the EU and US are a heterogeneous group with a limited responsiveness to children's health needs. Overall, we found a disproportionate focus on NCDs, many of which have a high burden in adults but not in children. Conversely, we found few medicines that address high-burden paediatric diseases, particularly childhood infections. Still, the inclusion of about a third of the sampled medicines in the WHO EMLc suggests that there has been a relevant contribution to paediatric care. Finally, the study identified high-burden diseases with available treatments where access remains limited.

### *Mismatch between disease burden and spectrum of medicines*

Our findings support previous evidence on the limited alignment between R&D and paediatric needs in the EU and US itself, including the bias towards therapeutic areas with relevant adult indications (19). Studies conducted after the adoption of the EU/US legislation have shown persisting off-labelling prescribing across therapeutic areas (20-21). This evidence, together with our study, suggests that while paediatric legislation may have addressed the needs of children to some extent, significant gaps remain. The lack of paediatric treatments for poverty-related diseases show that the gap between the needs and research efforts is most pronounced for children in LMICs.

The focus on areas with adult indications found in our study echoes the fact that paediatric legislation requires developers to assess the potential of medicines primarily developed for adults for their use in children. However, this policy approach is limited by the lack of alignment between research efforts and health needs of children and adults in general. A study by the US Congressional Budget Office suggested that instead of health needs, R&D investment decisions are based on expected sales, R&D costs, and local policies (22). A study analysing the pharmaceutical pipeline from 2006 to 2011 found that 26% of 2477 medicines were indicated for neoplasms, followed by diseases of the nervous system and sense organs (13%), infectious and parasitic diseases (11%) and EMBI disorders (9%) (23). These

1  
2  
3 figures are echoed in the distribution of medicines in our study and do not reflect the spectrum of the  
4 global burden of disease, in adults or children (24).  
5

#### 6 *Advancing regulatory policies for children*

7

8 Our results show that there have been some relevant contributions to paediatric care since the  
9 implementation of the EU/US paediatric policies. As such, paediatric policies may be a promising policy  
10 tool to improve availability of appropriate paediatric medicines, provided they are modified to be more  
11 needs-oriented. Such changes would also be beneficial in regions where paediatric legislation is already  
12 in place. For example, the European Commission has recently proposed variable data protection  
13 periods depending on the unmet needs addressed by the medicine (25). Such measures could  
14 strengthen the responsiveness of paediatric legislation to paediatric health needs and encourage  
15 research into conditions relevant to children. Ideally, the assessment of unmet needs underlying  
16 variable protection periods or other measures tied to paediatric needs should be based on a global  
17 assessment of paediatric needs. In addition, the introduction of paediatric legislation in countries  
18 outside of the EU and US should include the harmonisation of regulatory obligations and rewards to  
19 enhance compliance and impact (26). Nonetheless, fostering needs-driven R&D for paediatric  
20 medicines requires complementary financing mechanisms directed at the development of original  
21 paediatric medicines beyond the scope of paediatric legislation. Efforts to define missing medicines  
22 were undertaken in the past (27-28) and could serve as a sound basis for policy development in this  
23 area.  
24  
25  
26

27 Our study also highlights that successful drug development does not always result in practical use. For  
28 example, Australia and Canada were the only countries with a negligible burden of vaccine-preventable  
29 diseases in our study. These findings underscore the relevance of health system and other barriers that  
30 affect access to existing medicines, particularly in LMICs (29). Public health efforts aimed at securing  
31 access to available treatments need to continue.  
32  
33

#### 34 *Strengths and limitations*

35

36 Our study provides important insights into the responsiveness of paediatric legislation to paediatric  
37 health needs countries with diverse disease burden and globally. The study is the first to systematically  
38 compare paediatric R&D to paediatric health needs, despite more than a decade since the  
39 implementation of paediatric legislation. It offers relevant and novel insights into the potential gains  
40 and limitations of paediatric legislation and can support policy-making decisions in the EU and beyond.  
41  
42

43 This study has several limitations. The exclusion of contraceptives and symptomatic treatments, i.e.  
44 pain killers, from the DALYs mapping may have underestimated the responsiveness of the studied  
45 medicines sample to paediatric needs. Some DALY causes, such as injuries, frequently require non-  
46 pharmaceutical interventions or surgeries, which may explain the small number of medicines in the  
47 sample for such causes. Medicines approved after 2018 were not analysed. The EU/US orphan drug  
48 legislation (30-31) may have contributed to the high number medicines for low-burden diseases,  
49 obscuring the relationship to paediatric legislation. Moreover, while our results examine the scope of  
50 medicines developed under the paediatric legislation, the lack of a comparison to paediatric R&D  
51 before policy implementation limits our ability to assess the direct effect of the legislation. Finally,  
52 limitations associated with the use of DALYS apply (32).  
53  
54  
55

#### 56 **Conclusion**

57

58 Medicines developed under the paediatric legislation in the EU and US are only partially responsive to  
59 paediatric health needs and exhibit a disproportionate focus on NCDs. To be considered for wider  
60 implementation, paediatric incentives and obligations should therefore be more targeted towards



1  
2  
3 paediatric health needs. International harmonisation of legislation and alignment with global research  
4 priorities could further strengthen its impact on child health and support ongoing efforts to improve  
5 access to medicines. Furthermore, efforts should be made to ensure global access to authorised  
6 paediatric medicines.  
7

#### 8 9 **Authorship:**

10  
11 AV carried out data collection, analysis, and interpretation, drafted the initial paper, reviewed, and  
12 agreed on the final version.  
13

14  
15 RJ contributed to the data interpretation, reviewed, revised the manuscript, and agreed on the final  
16 version.  
17

18  
19 AJ conceptualised the work, reviewed, commented, and agreed on the final version of the manuscript.  
20  
21

#### 22 **Funding Information:**

23  
24 This research received no specific grant from any funding agency in the public, commercial or not-  
25 for-profit sectors.  
26  
27

#### 28 **Research Ethics Approval:**

29  
30 No Ethics Approval  
31

#### 32 **Competing Interests**

33  
34 The authors declare no competing interests.  
35  
36

#### 37 **Acknowledgements**

38  
39 Not applicable  
40  
41

#### 42 **Abbreviations**

43  
44 ATC – Anatomic Therapeutic Chemical  
45

46  
47 CMNN – Communicable, Maternal, Neonatal And Nutritional  
48

49  
50 DALYs – Disability Adjusted Life Years  
51

52  
53 EMA – European Medicines Agency  
54

55  
56 EMBI – Endocrine, metabolic, blood and immune  
57

58  
59 EML – Essential Medicines List  
60

EMLc – Essential Medicines List for children

EU – European Union

1  
2  
3 FDA – Food and Drug Administration  
4

5 HIV/AIDS – Human Immunodeficiency Virus Infection and Acquired Immunodeficiency Syndrome  
6

7 HPV – Human Papilloma Virus  
8

9 LMICs – Low- and Middle-Income Countries  
10

11 NCDs – Non-Communicable Diseases  
12

13 NTDs – Neglected Tropical Diseases  
14

15 R&D – Research and Development  
16

17 SDG – Sustainable Development Goals  
18

19 STDs – Sexually Transmitted Diseases  
20

21 US – United States  
22

23 WHO – World Health Organization  
24  
25

## 26 27 28 **References** 29

- 30 1. United Nations. Sustainable Development Goals: Goal 3. Health – United Nations Sustainable  
31 Development . Accessed March 5, 2022.
- 32 2. United Nations. Sustainable Development Goals: Goal 3. Health , target 3b – United Nations  
33 Sustainable Development . Accessed March 5, 2022.
- 34 3. Moulis F, Durrieu G, Lapeyre-Mestre M. Off-label and unlicensed drug use in children  
35 population. *Therapie*. 2018;73(2):135-149. Doi:10.1016/j.therap.2018.02.002
- 36 4. Vieira I, Sousa JJ, Vitorino C. Paediatric Medicines – Regulatory Drivers, Restraints,  
37 Opportunities and Challenges. *J Pharm Sci*. 2021;110(4):1545-1556.  
38 Doi:10.1016/j.xphs.2020.12.036
- 39 5. Van der Veken M, Brouwers J, Budts V, et al. Practical and operational considerations related  
40 to paediatric oral drug formulation: An industry survey. *Int J Pharm*. 2022;618:121670.  
41 Doi:10.1016/j.ijpharm.2022.121670
- 42 6. European Commission. Regulation (EC) No 1901/2006 of the European Parliament and of the  
43 Council of 12 December 2006 on medicinal products for paediatric use and amending  
44 Regulation (EEC) No 1768/92, Directive 2001/20/EC, Directive 2001/83/EC and Regulation  
45 (EC) No 726/2004. 2006. European Commission. EUR-Lex – 32006R1901 – EN – EUR-Lex  
46 (12uropa.eu). Accessed January 10, 2022.
- 47 7. Food and Drug Administration. Fact Sheet: Pediatric provisions in the Food and Drug  
48 Administration Safety and Innovation Act (FDASIA). [https://www.fda.gov/regulatory-](https://www.fda.gov/regulatory-information/food-and-drug-administration-safety-and-innovation-act-fdasia/fact-sheet-pediatric-provisions-food-and-drug-administration-safety-and-innovation-act-fdasia)  
49 [information/food-and-drug-administration-safety-and-innovation-act-fdasia/fact-sheet-](https://www.fda.gov/regulatory-information/food-and-drug-administration-safety-and-innovation-act-fdasia/fact-sheet-pediatric-provisions-food-and-drug-administration-safety-and-innovation-act-fdasia)  
50 [pediatric-provisions-food-and-drug-administration-safety-and-innovation-act-fdasia](https://www.fda.gov/regulatory-information/food-and-drug-administration-safety-and-innovation-act-fdasia/fact-sheet-pediatric-provisions-food-and-drug-administration-safety-and-innovation-act-fdasia)  
51 Published March 2018. Accessed April 25, 2022.
- 52 8. Rocchi F, Paolucci P, Ceci A, Rossi P. The European paediatric legislation: benefits and  
53 perspectives. *Ital J Pediatr*. 2010;36:56. Published Aug 2010. Doi:10.1186/1824-7288-36-56
- 54 9. European Medicines Agency. 10-year Report to the European Commission. General report on  
55 the experience acquired as a result of the application of the Paediatric Regulation 10-year  
56  
57  
58  
59  
60



- 1  
2  
3 Report to the European Commission (Core report) (13uropa.eu). Published August 2017.  
4 Accessed December 5, 2021.
- 5  
6 10. Thaul S. FDA's Authority to Ensure That Drugs Prescribed to Children Are Safe and Effective.  
7 <https://sgp.fas.org/crs/misc/RL33986.pdf> Published June 25, 2012. Accessed December 18,  
8 2020.
- 9  
10 11. World Health Organization. Disability-adjusted life years (DALYs).  
11 <https://www.who.int/data/gho/indicator-metadata-registry/imr-details/158>. Accessed  
12 January 17, 2023.
- 13  
14 12. Volodina A, Shah-Rohlf R, Jahn A. Does EU and US paediatric legislation improve the  
15 authorization availability of medicines for children in other countries?. *Br J Clin Pharmacol*.  
16 2023;89(3):1056-1066. Doi:10.1111/bcp.15553
- 17  
18 13. Global Burden of Disease Collaborative Network. Global Burden of Disease Study 2019 (GBD  
19 2019). Seattle, United States: Institute for Health Metrics and Evaluation (IHME), 2020  
20 <https://www.healthdata.org/research-analysis/gbd>. Accessed February 2023.
- 21  
22 14. Institute for Health Metrics and Evaluation. Global Burden of Disease (GBD) data and tools  
23 guide. <https://www.healthdata.org/research-analysis/about-gbd> Accessed December 17,  
24 2023.
- 25  
26 15. World Health Organization. Expert Committee on Selection and Use of Essential Medicines.  
27 [https://www.who.int/groups/expert-committee-on-selection-and-use-of-essential-](https://www.who.int/groups/expert-committee-on-selection-and-use-of-essential-medicines)  
28 [medicines](https://www.who.int/groups/expert-committee-on-selection-and-use-of-essential-medicines). Accessed February 17, 2023
- 29  
30 16. World Health Organization. International Statistical Classification of Diseases and Related  
31 Health Problems 10<sup>th</sup> Revision. <https://icd.who.int/browse10/2016/en> Accessed February 17,  
32 2023
- 33  
34 17. Institute for Health Metrics and Evaluation. Global Burden of Disease Study 2019 (GBD 2019)  
35 Cause List Mapped to ICD Codes. [https://ghdx.healthdata.org/record/ihme-data/gbd-2019-](https://ghdx.healthdata.org/record/ihme-data/gbd-2019-cause-icd-code-mappings)  
36 [cause-icd-code-mappings](https://ghdx.healthdata.org/record/ihme-data/gbd-2019-cause-icd-code-mappings). Accessed March 2023.
- 37  
38 18. WHO Collaborating Centre for Drug Statistics and Methodology. ATC/DDD Index 2023.  
39 [https://www.whocc.no/atc\\_ddd\\_index/](https://www.whocc.no/atc_ddd_index/). Last updated January 23, 2023. Accessed March  
40 2023.
- 41  
42 19. European Commission. Commission Staff Working Document. Joint evaluation of Regulation  
43 (EC) No 1901/2006 of the European Parliament and of the Council of 12 December 2006 on  
44 medicinal products for paediatric use and Regulation (EC) No 141/2000 of the European  
45 Parliament and of the Council of 16 December 1999 on orphan medicinal products.  
46 [https://health.ec.europa.eu/system/files/2020-08/orphan-regulation\\_eval\\_swd\\_2020-](https://health.ec.europa.eu/system/files/2020-08/orphan-regulation_eval_swd_2020-163_part-1_0.pdf)  
47 [163\\_part-1\\_0.pdf](https://health.ec.europa.eu/system/files/2020-08/orphan-regulation_eval_swd_2020-163_part-1_0.pdf). Published August 11, 2020. Accessed February 18, 2023.
- 48  
49 20. Netherlands Institute For Health Services Research. Study on off-label use of medicinal  
50 products in the European Union. February 2017.  
51 [https://www.nivel.nl/sites/default/files/bestanden/Report\\_OFF\\_LABEL\\_Nivel-RIVM-](https://www.nivel.nl/sites/default/files/bestanden/Report_OFF_LABEL_Nivel-RIVM-EPHA.pdf)  
52 [EPHA.pdf](https://www.nivel.nl/sites/default/files/bestanden/Report_OFF_LABEL_Nivel-RIVM-EPHA.pdf). Accessed February 17, 2023.
- 53  
54 21. Allen HC, Garbe MC, Lees J, et al. Off-Label Medication use in Children, More Common than  
55 We Think: A Systematic Review of the Literature. *J Okla State Med Assoc*. 2018;111(8):776-  
56 783.
- 57  
58 22. Congressional Budget Office. Research and Development in the Pharmaceutical Industry.  
59 <https://www.cbo.gov/publication/57025>. Published April 8, 2021. Accessed February 20,  
60 2023.
- 61  
62 23. Fisher JA, Cottingham MD, Kalbaugh CA. Peering into the pharmaceutical "pipeline":  
63 investigational drugs, clinical trials, and industry priorities. *Soc Sci Med*. 2015;131:322-330.  
64 Doi:10.1016/j.socscimed.2014.08.023

- 1  
2  
3 24. Milne CP, Kaitin KI. Are Regulation and Innovation Priorities Serving Public Health Needs?.  
4 Front Pharmacol. 2019;10:144. Published 2019 Mar 8. doi:10.3389/fphar.2019.00144  
5  
6 25. European Commission. Reform of the EU Pharmaceutical Legislation.  
7 [https://health.ec.europa.eu/medicinal-products/pharmaceutical-strategy-europe/reform-eu-](https://health.ec.europa.eu/medicinal-products/pharmaceutical-strategy-europe/reform-eu-pharmaceutical-legislation_en)  
8 [pharmaceutical-legislation\\_en](https://health.ec.europa.eu/medicinal-products/pharmaceutical-strategy-europe/reform-eu-pharmaceutical-legislation_en). Published April 26, 2023. Accessed April 30, 2023.  
9  
10 26. Volodina A, Jahn RH, Jahn A. Suitability of paediatric legislation beyond the United States and  
11 Europe: a qualitative study on access to paediatric medicines. 2023. Unpublished manuscript  
12 in review at BMJ Public Health.  
13  
14 27. World Health Organization. Priority medicines for Europe and the world / Warren Kaplan,  
15 Richard Laing. World Health Organization. November 2004.  
16 <https://iris.who.int/handle/10665/68769>. Accessed April 30, 2023  
17  
18 28. United Nations Commission On Life-Saving Commodities For Women And Children.  
19 [https://www.unfpa.org/sites/default/files/pub-](https://www.unfpa.org/sites/default/files/pub-pdf/Final%20UN%20Commission%20Report_14sept2012.pdf)  
20 [pdf/Final%20UN%20Commission%20Report\\_14sept2012.pdf](https://www.unfpa.org/sites/default/files/pub-pdf/Final%20UN%20Commission%20Report_14sept2012.pdf). August 31, 2012. Accessed April  
21 30, 2023  
22  
23 29. Ozawa S, Shankar R, Leopold C, Orubu S. Access to medicines through health systems in low-  
24 and middle-income countries. Health Policy Plan. 2019;34(Supplement\_3):iii1-iii3.  
25 Doi:10.1093/heapol/czz119  
26  
27 30. European Commission. Regulation (EC) No 141/2000 Of The European Parliament And Of The  
28 Council of 16 December 1999 on orphan medicinal products. [https://eur-lex.europa.eu/legal-](https://eur-lex.europa.eu/legal-content/EN/TXT/PDF/?uri=CELEX:32000R0141&from=EN)  
29 [content/EN/TXT/PDF/?uri=CELEX:32000R0141&from=EN](https://eur-lex.europa.eu/legal-content/EN/TXT/PDF/?uri=CELEX:32000R0141&from=EN). Accessed February 23, 2023.  
30  
31 31. Herder M. What Is the Purpose of the Orphan Drug Act?. PLoS Med. 2017;14(1):e1002191.  
32 Published 2017 Jan 3. Doi:10.1371/journal.pmed.1002191  
33  
34 32. GBD 2019 Diseases and Injuries Collaborators. Global burden of 369 diseases and injuries in  
35 204 countries and territories, 1990-2019: a systematic analysis for the Global Burden of  
36 Disease Study 2019 [published correction appears in Lancet. 2020 Nov 14;396(10262):1562].  
37 Lancet. 2020;396(10258):1204-1222. doi:10.1016/S0140-6736(20)30925-9  
38  
39  
40  
41  
42  
43  
44  
45  
46  
47  
48  
49  
50  
51  
52  
53  
54  
55  
56  
57  
58  
59  
60

Figure 1 Process steps of medicines mapping to the Disability Adjusted Life Years with an illustrative example

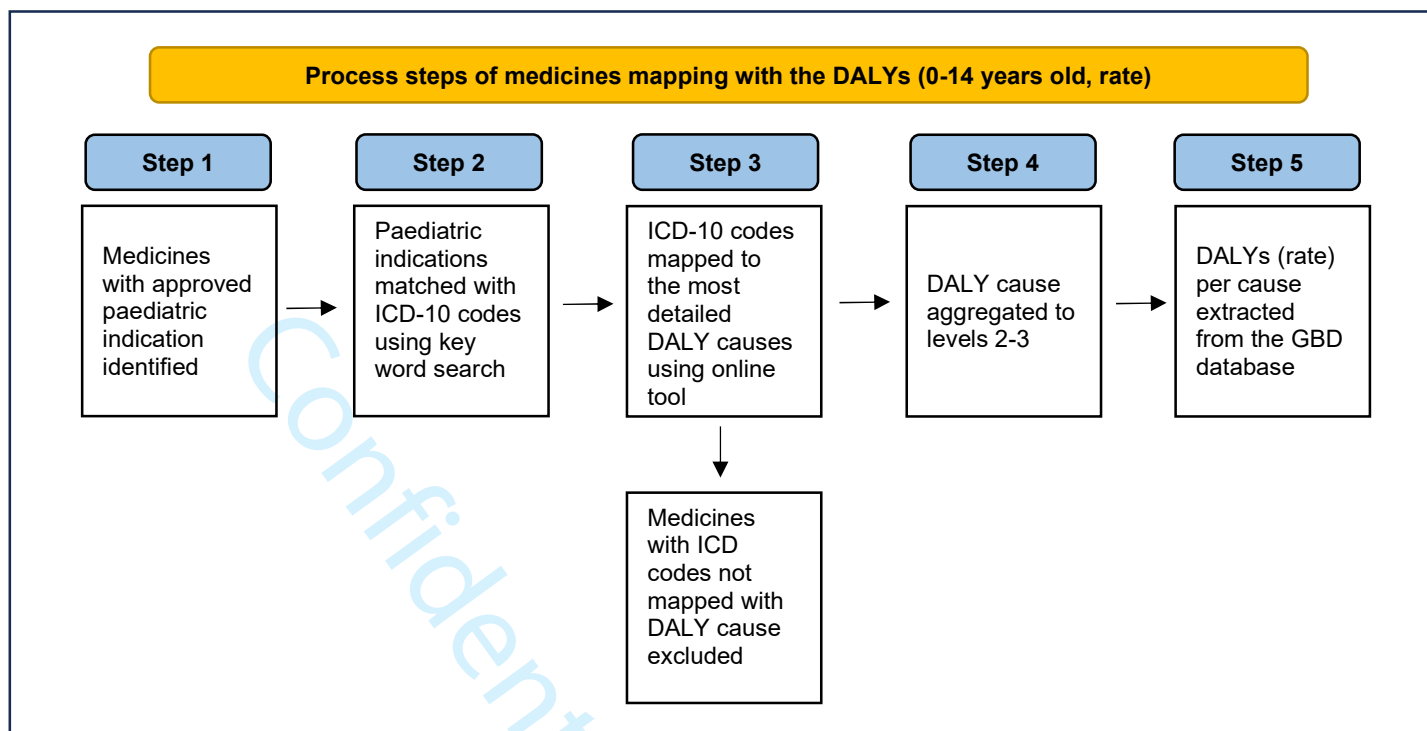

**Illustrative example**

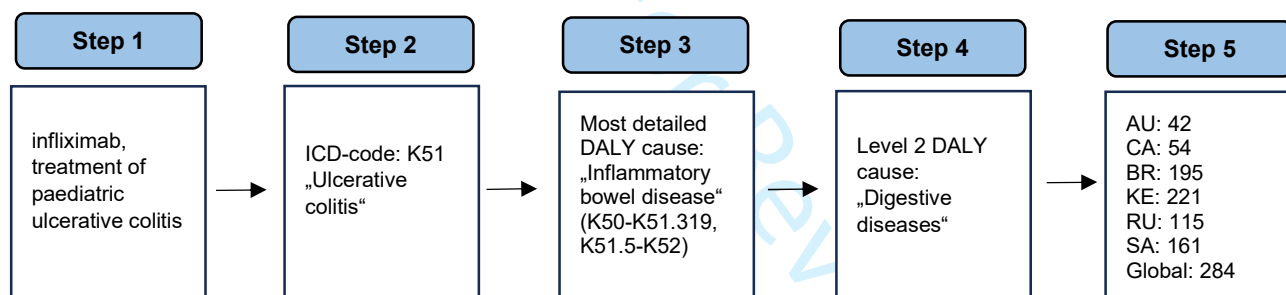

AU- Australia; CA- Canada; BR – Brazil; KE – Kenya; RU – Russia; SA – South Africa

Volodina et al., Public health relevance of medicines developed under paediatric legislation in Europe and the United States: a systematic mapping study

## Supplement 1: All Disability Adjusted Life Years causes with mapped sampled medicines

|                                         | DALYs (0-14 years old, both sexes, rate), 2019 |        |        |       |        |              |        | Sampled medicines, N |
|-----------------------------------------|------------------------------------------------|--------|--------|-------|--------|--------------|--------|----------------------|
|                                         | Australia                                      | Brazil | Canada | Kenya | Russia | South Africa | Global |                      |
| Acne vulgaris                           | 67                                             | 51     | 53     | 78    | 38     | 73           | 65     | 2                    |
| Acute glomerulonephritis                | 0                                              | 2      | 0      | 2     | 1      | 2            | 3      | 0                    |
| Acute hepatitis A                       | 2                                              | 6      | 2      | 26    | 5      | 8            | 59     | 0                    |
| Acute hepatitis B                       | 0                                              | 3      | 0      | 5     | 4      | 1            | 22     | 6                    |
| Acute hepatitis C                       | 0                                              | 1      | 0      | 2     | 0      | 0            | 4      | 1                    |
| Acute hepatitis E                       | 0                                              | 1      | 0      | 1     | 0      | 1            | 3      | 0                    |
| Acute lymphoid leukemia                 | 29                                             | 92     | 26     | 41    | 57     | 16           | 66     | 3                    |
| Acute myeloid leukemia                  | 20                                             | 46     | 20     | 20    | 18     | 6            | 30     | 0                    |
| Adverse effects of medical treatment    | 21                                             | 40     | 17     | 51    | 25     | 46           | 61     | 8                    |
| African trypanosomiasis                 | 0                                              | 0      | 0      | 0     | 0      | 0            | 2      | 0                    |
| Age-related and other hearing loss      | 38                                             | 71     | 28     | 161   | 78     | 161          | 106    | 0                    |
| Age-related macular degeneration        | 0                                              | 0      | 0      | 0     | 0      | 0            | 0      | 0                    |
| Alcohol use disorders                   | 4                                              | 3      | 6      | 2     | 3      | 2            | 2      | 0                    |
| Alcoholic cardiomyopathy                | 0                                              | 0      | 0      | 0     | 0      | 0            | 0      | 0                    |
| Alopecia areata                         | 3                                              | 3      | 4      | 2     | 3      | 2            | 3      | 0                    |
| Alzheimer's disease and other dementias | 0                                              | 0      | 0      | 0     | 0      | 0            | 0      | 0                    |
| Amphetamine use disorders               | 0                                              | 0      | 0      | 0     | 0      | 0            | 0      | 0                    |
| Anorexia nervosa                        | 13                                             | 6      | 8      | 3     | 4      | 4            | 4      | 0                    |
| Anxiety disorders                       | 249                                            | 231    | 131    | 115   | 128    | 149          | 157    | 0                    |
| Aortic aneurysm                         | 0                                              | 0      | 0      | 0     | 0      | 0            | 0      | 0                    |
| Appendicitis                            | 3                                              | 15     | 2      | 15    | 5      | 11           | 16     | 2                    |

Volodina et al., Public health relevance of medicines developed under paediatric legislation in Europe and the United States: a systematic mapping study

|                                                            |     |     |     |     |     |     |     |   |
|------------------------------------------------------------|-----|-----|-----|-----|-----|-----|-----|---|
| Asbestosis                                                 | 0   | 0   | 0   | 0   | 0   | 0   | 0   | 0 |
| Ascariasis                                                 | 0   | 4   | 0   | 8   | 0   | 1   | 22  | 0 |
| Asthma                                                     | 455 | 416 | 301 | 212 | 148 | 274 | 210 | 5 |
| Atopic dermatitis                                          | 250 | 208 | 183 | 80  | 396 | 96  | 160 | 1 |
| Atrial fibrillation and flutter                            | 0   | 0   | 0   | 0   | 0   | 0   | 0   | 0 |
| Attention-deficit/hyperactivity disorder                   | 65  | 37  | 42  | 12  | 21  | 11  | 21  | 1 |
| Autism spectrum disorders                                  | 80  | 66  | 112 | 71  | 75  | 70  | 66  | 0 |
| Benign and in situ cervical and uterine neoplasms          | 0   | 0   | 0   | 0   | 0   | 0   | 0   | 0 |
| Benign and in situ intestinal neoplasms                    | 0   | 0   | 0   | 0   | 0   | 0   | 0   | 0 |
| Benign prostatic hyperplasia                               | 0   | 0   | 0   | 0   | 0   | 0   | 0   | 0 |
| Bipolar disorder                                           | 37  | 34  | 31  | 13  | 10  | 12  | 12  | 3 |
| Bladder cancer                                             | 0   | 0   | 0   | 0   | 0   | 0   | 0   | 0 |
| Brain and central nervous system cancer                    | 70  | 139 | 75  | 54  | 93  | 35  | 85  | 0 |
| Breast cancer                                              | 0   | 0   | 0   | 0   | 0   | 0   | 0   | 0 |
| Bulimia nervosa                                            | 18  | 4   | 10  | 3   | 4   | 4   | 4   | 0 |
| Cannabis use disorders                                     | 3   | 1   | 6   | 0   | 1   | 0   | 1   | 0 |
| Caries of deciduous teeth                                  | 9   | 11  | 9   | 11  | 12  | 10  | 10  | 0 |
| Caries of permanent teeth                                  | 10  | 12  | 11  | 10  | 14  | 11  | 13  | 0 |
| Cataract                                                   | 0   | 0   | 0   | 0   | 0   | 0   | 0   | 0 |
| Cellulitis                                                 | 3   | 9   | 4   | 3   | 3   | 3   | 3   | 0 |
| Cervical cancer                                            | 0   | 0   | 0   | 0   | 0   | 0   | 0   | 0 |
| Chagas disease                                             | 0   | 1   | 0   | 0   | 0   | 0   | 0   | 0 |
| Chlamydial infection                                       | 0   | 0   | 0   | 0   | 0   | 0   | 0   | 0 |
| Chronic kidney disease due to diabetes mellitus type 1     | 0   | 1   | 0   | 1   | 1   | 2   | 2   | 0 |
| Chronic kidney disease due to diabetes mellitus type 2     | 0   | 0   | 0   | 0   | 0   | 0   | 0   | 0 |
| Chronic kidney disease due to glomerulonephritis           | 4   | 24  | 8   | 25  | 19  | 25  | 32  | 0 |
| Chronic kidney disease due to hypertension                 | 0   | 0   | 0   | 0   | 0   | 0   | 0   | 0 |
| Chronic kidney disease due to other and unspecified causes | 8   | 41  | 16  | 31  | 30  | 46  | 59  | 0 |

## Volodina et al., Public health relevance of medicines developed under paediatric legislation in Europe and the United States: a systematic mapping study

|                                                                |     |      |     |      |     |      |      |   |
|----------------------------------------------------------------|-----|------|-----|------|-----|------|------|---|
| Chronic lymphoid leukemia                                      | 0   | 0    | 0   | 0    | 0   | 0    | 0    | 0 |
| Chronic myeloid leukemia                                       | 1   | 1    | 1   | 7    | 1   | 1    | 8    | 3 |
| Chronic obstructive pulmonary disease                          | 9   | 12   | 8   | 26   | 11  | 25   | 22   | 0 |
| Cirrhosis and other chronic liver diseases due to alcohol use  | 0   | 0    | 0   | 0    | 0   | 0    | 0    | 0 |
| Cirrhosis and other chronic liver diseases due to hepatitis B  | 0   | 0    | 0   | 1    | 0   | 0    | 1    | 0 |
| Cirrhosis and other chronic liver diseases due to hepatitis C  | 0   | 1    | 0   | 1    | 0   | 0    | 2    | 0 |
| Cirrhosis and other chronic liver diseases due to NAFLD        | 0   | 0    | 0   | 0    | 0   | 0    | 0    | 0 |
| Cirrhosis and other chronic liver diseases due to other causes | 2   | 22   | 4   | 47   | 11  | 22   | 71   | 0 |
| Coal workers pneumoconiosis                                    | 0   | 0    | 0   | 0    | 0   | 0    | 0    | 0 |
| Cocaine use disorders                                          | 1   | 1    | 1   | 0    | 0   | 0    | 0    | 0 |
| Colon and rectum cancer                                        | 1   | 2    | 1   | 1    | 1   | 2    | 2    | 0 |
| Conduct disorder                                               | 193 | 181  | 157 | 194  | 187 | 193  | 172  | 0 |
| Congenital heart anomalies                                     | 172 | 1185 | 197 | 546  | 369 | 415  | 866  | 0 |
| Congenital musculoskeletal and limb anomalies                  | 90  | 103  | 75  | 106  | 83  | 144  | 107  | 0 |
| Contact dermatitis                                             | 2   | 4    | 16  | 4    | 16  | 4    | 5    | 0 |
| Cutaneous and mucocutaneous leishmaniasis                      | 0   | 1    | 0   | 0    | 0   | 0    | 2    | 0 |
| Cystic echinococcosis                                          | 0   | 0    | 0   | 2    | 1   | 0    | 1    | 0 |
| Cysticercosis                                                  | 0   | 1    | 0   | 1    | 0   | 1    | 0    | 0 |
| Decubitus ulcer                                                | 0   | 1    | 0   | 0    | 0   | 0    | 0    | 0 |
| Dengue                                                         | 2   | 20   | 0   | 4    | 0   | 0    | 54   | 0 |
| Diabetes mellitus type 1                                       | 12  | 24   | 15  | 20   | 11  | 19   | 26   | 5 |
| Diabetes mellitus type 2                                       | 0   | 0    | 0   | 0    | 0   | 0    | 0    | 5 |
| Diarrheal diseases                                             | 76  | 561  | 138 | 4147 | 226 | 2431 | 2636 | 2 |
| Dietary iron deficiency                                        | 104 | 368  | 39  | 395  | 91  | 323  | 695  | 0 |
| Digestive congenital anomalies                                 | 59  | 372  | 63  | 155  | 118 | 115  | 215  | 0 |
| Diphtheria                                                     | 0   | 0    | 0   | 4    | 0   | 4    | 18   | 4 |
| Down syndrome                                                  | 45  | 164  | 46  | 44   | 35  | 102  | 72   | 0 |
| Drug-susceptible tuberculosis                                  | 1   | 25   | 1   | 213  | 9   | 587  | 285  | 0 |

Volodina et al., Public health relevance of medicines developed under paediatric legislation in Europe and the United States: a systematic mapping study

|                                                   |     |     |     |      |     |      |     |    |
|---------------------------------------------------|-----|-----|-----|------|-----|------|-----|----|
| Dysthymia                                         | 11  | 7   | 12  | 11   | 7   | 9    | 9   | 0  |
| Ebola                                             | 0   | 0   | 0   | 0    | 0   | 0    | 2   | 0  |
| Edentulism                                        | 0   | 0   | 0   | 0    | 0   | 0    | 0   | 0  |
| Encephalitis                                      | 9   | 28  | 9   | 19   | 60  | 15   | 121 | 1  |
| Endocarditis                                      | 1   | 15  | 1   | 5    | 3   | 5    | 10  | 0  |
| Endocrine, metabolic, blood, and immune disorders | 167 | 161 | 134 | 79   | 154 | 186  | 159 | 29 |
| Endometriosis                                     | 0   | 0   | 0   | 0    | 0   | 0    | 0   | 0  |
| Esophageal cancer                                 | 0   | 0   | 0   | 0    | 0   | 0    | 0   | 0  |
| Extensively drug-resistant tuberculosis           | 0   | 0   | 0   | 0    | 2   | 0    | 1   | 0  |
| Female infertility                                | 0   | 0   | 0   | 0    | 0   | 0    | 0   | 0  |
| Food-borne trematodiasis                          | 0   | 0   | 0   | 0    | 1   | 0    | 1   | 0  |
| Fungal skin diseases                              | 20  | 26  | 7   | 64   | 15  | 36   | 45  | 2  |
| G6PD deficiency                                   | 0   | 12  | 2   | 1    | 1   | 7    | 5   | 0  |
| G6PD trait                                        | 0   | 0   | 0   | 0    | 0   | 0    | 0   | 0  |
| Gallbladder and biliary diseases                  | 3   | 9   | 4   | 5    | 7   | 5    | 9   | 0  |
| Gallbladder and biliary tract cancer              | 0   | 0   | 0   | 0    | 0   | 0    | 0   | 0  |
| Gastritis and duodenitis                          | 3   | 5   | 2   | 6    | 6   | 10   | 10  | 0  |
| Gastroesophageal reflux disease                   | 1   | 2   | 1   | 1    | 1   | 1    | 1   | 3  |
| Genital herpes                                    | 0   | 0   | 0   | 0    | 0   | 0    | 0   | 0  |
| Genital prolapse                                  | 0   | 0   | 0   | 0    | 0   | 0    | 0   | 0  |
| Glaucoma                                          | 0   | 0   | 0   | 0    | 0   | 0    | 0   | 0  |
| Gonococcal infection                              | 0   | 0   | 0   | 0    | 0   | 0    | 0   | 0  |
| Gout                                              | 0   | 0   | 0   | 0    | 0   | 0    | 0   | 0  |
| Guinea worm disease                               | 0   | 0   | 0   | 0    | 0   | 0    | 0   | 0  |
| Hemolytic disease and other neonatal jaundice     | 3   | 52  | 3   | 113  | 33  | 113  | 252 | 0  |
| HIV/AIDS                                          | 2   | 79  | 4   | 1875 | 150 | 3072 | 338 | 15 |
| Hodgkin lymphoma                                  | 1   | 3   | 1   | 6    | 3   | 2    | 7   | 0  |
| Hookworm disease                                  | 0   | 4   | 0   | 19   | 0   | 16   | 19  | 0  |

## Volodina et al., Public health relevance of medicines developed under paediatric legislation in Europe and the United States: a systematic mapping study

|                                                     |     |     |     |      |     |      |      |    |
|-----------------------------------------------------|-----|-----|-----|------|-----|------|------|----|
| Hypertensive heart disease                          | 0   | 0   | 0   | 0    | 0   | 0    | 0    | 7  |
| Idiopathic developmental intellectual disability    | 16  | 20  | 27  | 41   | 25  | 20   | 81   | 0  |
| Idiopathic epilepsy                                 | 89  | 167 | 64  | 207  | 84  | 183  | 180  | 10 |
| Inflammatory bowel disease                          | 3   | 3   | 7   | 4    | 2   | 5    | 4    | 4  |
| Inguinal, femoral, and abdominal hernia             | 9   | 31  | 9   | 33   | 46  | 53   | 36   | 0  |
| Interstitial lung disease and pulmonary sarcoidosis | 2   | 4   | 4   | 2    | 2   | 3    | 3    | 0  |
| Intracerebral hemorrhage                            | 3   | 12  | 4   | 22   | 6   | 14   | 46   | 0  |
| Invasive Non-typhoidal Salmonella (iNTS)            | 0   | 3   | 0   | 712  | 1   | 113  | 276  | 0  |
| Iodine deficiency                                   | 1   | 0   | 1   | 3    | 2   | 2    | 12   | 0  |
| Ischemic heart disease                              | 0   | 0   | 0   | 0    | 0   | 0    | 0    | 0  |
| Ischemic stroke                                     | 8   | 9   | 12  | 25   | 14  | 23   | 22   | 0  |
| Kidney cancer                                       | 8   | 22  | 7   | 4    | 13  | 10   | 12   | 0  |
| Klinefelter syndrome                                | 0   | 0   | 0   | 0    | 0   | 0    | 0    | 0  |
| Larynx cancer                                       | 0   | 0   | 0   | 0    | 0   | 0    | 0    | 0  |
| Latent tuberculosis infection                       | 0   | 0   | 0   | 0    | 0   | 0    | 0    | 0  |
| Leprosy                                             | 0   | 0   | 0   | 0    | 0   | 0    | 0    | 0  |
| Lip and oral cavity cancer                          | 1   | 1   | 1   | 1    | 1   | 1    | 1    | 0  |
| Liver cancer due to alcohol use                     | 0   | 0   | 0   | 0    | 0   | 0    | 0    | 0  |
| Liver cancer due to hepatitis B                     | 0   | 0   | 0   | 1    | 1   | 0    | 1    | 0  |
| Liver cancer due to hepatitis C                     | 0   | 0   | 0   | 0    | 0   | 0    | 0    | 0  |
| Liver cancer due to NASH                            | 0   | 0   | 0   | 0    | 0   | 0    | 0    | 0  |
| Liver cancer due to other causes                    | 6   | 7   | 7   | 5    | 13  | 4    | 13   | 0  |
| Low back pain                                       | 109 | 137 | 133 | 71   | 148 | 65   | 100  | 0  |
| Lower respiratory infections                        | 62  | 997 | 57  | 3119 | 397 | 2527 | 3196 | 14 |
| Lymphatic filariasis                                | 0   | 3   | 0   | 24   | 0   | 0    | 14   | 0  |
| Major depressive disorder                           | 135 | 178 | 91  | 47   | 28  | 42   | 57   | 1  |
| Malaria                                             | 0   | 7   | 0   | 2450 | 0   | 40   | 1820 | 2  |
| Male infertility                                    | 0   | 0   | 0   | 0    | 0   | 0    | 0    | 0  |



Volodina et al., Public health relevance of medicines developed under paediatric legislation in Europe and the United States: a systematic mapping study

|                                                                        |     |      |     |      |     |      |      |   |
|------------------------------------------------------------------------|-----|------|-----|------|-----|------|------|---|
| Malignant skin melanoma                                                | 5   | 2    | 2   | 1    | 2   | 1    | 1    | 1 |
| Maternal disorders                                                     | 0   | 3    | 0   | 5    | 0   | 0    | 4    | 0 |
| Measles                                                                | 0   | 0    | 0   | 196  | 0   | 281  | 349  | 0 |
| Meningitis                                                             | 24  | 146  | 24  | 600  | 59  | 261  | 604  | 7 |
| Mesothelioma                                                           | 0   | 0    | 0   | 0    | 0   | 0    | 0    | 0 |
| Migraine                                                               | 132 | 417  | 176 | 89   | 133 | 127  | 165  | 3 |
| Motor neuron disease                                                   | 25  | 7    | 13  | 1    | 4   | 1    | 4    | 0 |
| Multidrug-resistant tuberculosis without extensive drug resistance     | 0   | 1    | 0   | 7    | 4   | 33   | 25   | 0 |
| Multiple myeloma                                                       | 0   | 0    | 0   | 0    | 0   | 0    | 0    | 0 |
| Multiple sclerosis                                                     | 0   | 0    | 1   | 0    | 0   | 0    | 0    | 1 |
| Myelodysplastic, myeloproliferative, and other hematopoietic neoplasms | 1   | 5    | 4   | 1    | 2   | 1    | 2    | 0 |
| Myocarditis                                                            | 8   | 17   | 8   | 5    | 7   | 4    | 12   | 0 |
| Nasopharynx cancer                                                     | 1   | 1    | 1   | 2    | 1   | 1    | 2    | 0 |
| Near vision loss                                                       | 0   | 0    | 0   | 0    | 0   | 1    | 0    | 0 |
| Neck pain                                                              | 10  | 8    | 18  | 7    | 8   | 7    | 13   | 0 |
| Neonatal encephalopathy due to birth asphyxia and trauma               | 346 | 1313 | 327 | 3220 | 355 | 2341 | 2625 | 0 |
| Neonatal preterm birth                                                 | 513 | 2240 | 791 | 2250 | 482 | 4103 | 3182 | 0 |
| Neonatal sepsis and other neonatal infections                          | 33  | 1077 | 68  | 1621 | 288 | 1157 | 1093 | 2 |
| Neural tube defects                                                    | 79  | 324  | 60  | 258  | 76  | 146  | 383  | 0 |
| Non-Hodgkin lymphoma                                                   | 9   | 26   | 11  | 27   | 17  | 15   | 25   | 0 |
| Non-melanoma skin cancer (basal-cell carcinoma)                        | 0   | 0    | 0   | 0    | 0   | 0    | 0    | 0 |
| Non-melanoma skin cancer (squamous-cell carcinoma)                     | 0   | 0    | 0   | 0    | 0   | 0    | 0    | 0 |
| Non-rheumatic calcific aortic valve disease                            | 0   | 0    | 0   | 0    | 0   | 0    | 0    | 0 |
| Non-rheumatic degenerative mitral valve disease                        | 0   | 0    | 0   | 0    | 0   | 0    | 0    | 0 |
| Onchocerciasis                                                         | 0   | 0    | 0   | 0    | 0   | 0    | 11   | 0 |
| Opioid use disorders                                                   | 0   | 0    | 0   | 0    | 0   | 0    | 0    | 0 |
| Orofacial clefts                                                       | 3   | 9    | 1   | 14   | 3   | 17   | 17   | 0 |

## Volodina et al., Public health relevance of medicines developed under paediatric legislation in Europe and the United States: a systematic mapping study

|                                                |     |      |     |      |     |      |      |    |
|------------------------------------------------|-----|------|-----|------|-----|------|------|----|
| Osteoarthritis hand                            | 0   | 0    | 0   | 0    | 0   | 0    | 0    | 0  |
| Osteoarthritis hip                             | 0   | 0    | 0   | 0    | 0   | 0    | 0    | 0  |
| Osteoarthritis knee                            | 0   | 0    | 0   | 0    | 0   | 0    | 0    | 0  |
| Osteoarthritis other                           | 0   | 0    | 0   | 0    | 0   | 0    | 0    | 0  |
| Other benign and in situ neoplasms             | 0   | 0    | 0   | 0    | 0   | 0    | 0    | 2  |
| Other cardiomyopathy                           | 8   | 74   | 14  | 47   | 25  | 49   | 32   | 0  |
| Other cardiovascular and circulatory diseases  | 13  | 45   | 14  | 41   | 13  | 29   | 58   | 0  |
| Other chromosomal abnormalities                | 112 | 178  | 166 | 59   | 78  | 127  | 95   | 0  |
| Other chronic respiratory diseases             | 13  | 30   | 14  | 34   | 13  | 38   | 32   | 8  |
| Other congenital birth defects                 | 132 | 659  | 170 | 519  | 320 | 561  | 589  | 2  |
| Other digestive diseases                       | 3   | 11   | 4   | 16   | 9   | 11   | 16   | 1  |
| Other drug use disorders                       | 0   | 0    | 1   | 0    | 0   | 0    | 0    | 0  |
| Other gynecological diseases                   | 0   | 1    | 0   | 1    | 0   | 1    | 1    | 1  |
| Other hemoglobinopathies and hemolytic anemias | 4   | 17   | 2   | 15   | 4   | 13   | 26   | 3  |
| Other intestinal infectious diseases           | 0   | 2    | 0   | 4    | 1   | 3    | 5    | 4  |
| Other leukemia                                 | 3   | 20   | 11  | 38   | 5   | 25   | 43   | 0  |
| Other malignant neoplasms                      | 56  | 108  | 76  | 82   | 73  | 48   | 120  | 1  |
| Other mental disorders                         | 3   | 1    | 3   | 1    | 1   | 1    | 2    | 1  |
| Other musculoskeletal disorders                | 7   | 15   | 65  | 2    | 3   | 2    | 10   | 1  |
| Other neglected tropical diseases              | 10  | 53   | 4   | 42   | 14  | 33   | 101  | 0  |
| Other neonatal disorders                       | 245 | 1226 | 354 | 1797 | 299 | 2955 | 1731 | 0  |
| Other neurological disorders                   | 57  | 76   | 59  | 75   | 75  | 68   | 71   | 1  |
| Other non-rheumatic valve diseases             | 0   | 0    | 0   | 0    | 0   | 0    | 0    | 0  |
| Other nutritional deficiencies                 | 2   | 10   | 3   | 9    | 6   | 6    | 31   | 0  |
| Other oral disorders                           | 31  | 32   | 31  | 32   | 32  | 32   | 31   | 1  |
| Other pharynx cancer                           | 0   | 0    | 0   | 0    | 0   | 0    | 0    | 0  |
| Other pneumoconiosis                           | 0   | 0    | 0   | 0    | 0   | 0    | 0    | 0  |
| Other sense organ diseases                     | 15  | 15   | 13  | 15   | 13  | 15   | 14   | 10 |

Volodina et al., Public health relevance of medicines developed under paediatric legislation in Europe and the United States: a systematic mapping study

|                                            |    |     |    |      |    |     |     |   |
|--------------------------------------------|----|-----|----|------|----|-----|-----|---|
| Other sexually transmitted infections      | 0  | 0   | 0  | 0    | 0  | 0   | 0   | 2 |
| Other skin and subcutaneous diseases       | 23 | 24  | 23 | 20   | 22 | 22  | 23  | 1 |
| Other unspecified infectious diseases      | 37 | 70  | 26 | 104  | 93 | 290 | 138 | 6 |
| Other urinary diseases                     | 3  | 4   | 3  | 17   | 4  | 7   | 11  | 1 |
| Other vision loss                          | 5  | 8   | 4  | 4    | 4  | 3   | 5   | 2 |
| Otitis media                               | 26 | 49  | 26 | 57   | 46 | 55  | 51  | 2 |
| Ovarian cancer                             | 1  | 2   | 1  | 1    | 2  | 2   | 2   | 0 |
| Pancreatic cancer                          | 0  | 0   | 0  | 0    | 0  | 0   | 0   | 0 |
| Pancreatitis                               | 1  | 2   | 1  | 1    | 2  | 0   | 2   | 0 |
| Paralytic ileus and intestinal obstruction | 13 | 91  | 16 | 84   | 21 | 39  | 103 | 0 |
| Paratyphoid fever                          | 0  | 0   | 0  | 16   | 0  | 0   | 50  | 0 |
| Parkinson's disease                        | 0  | 0   | 0  | 0    | 0  | 0   | 0   | 0 |
| Peptic ulcer disease                       | 0  | 2   | 1  | 5    | 2  | 2   | 10  | 0 |
| Periodontal diseases                       | 0  | 0   | 0  | 0    | 0  | 0   | 0   | 0 |
| Peripheral artery disease                  | 0  | 0   | 0  | 0    | 0  | 0   | 0   | 0 |
| Polycystic ovarian syndrome                | 2  | 0   | 1  | 0    | 0  | 0   | 1   | 0 |
| Premenstrual syndrome                      | 20 | 23  | 22 | 24   | 21 | 21  | 21  | 0 |
| Prostate cancer                            | 0  | 0   | 0  | 0    | 0  | 0   | 0   | 0 |
| Protein-energy malnutrition                | 10 | 194 | 10 | 1188 | 36 | 802 | 555 | 1 |
| Pruritus                                   | 4  | 5   | 5  | 8    | 5  | 7   | 5   | 0 |
| Psoriasis                                  | 52 | 32  | 41 | 6    | 13 | 9   | 15  | 2 |
| Pyoderma                                   | 6  | 24  | 2  | 23   | 5  | 15  | 21  | 4 |
| Rabies                                     | 0  | 0   | 0  | 15   | 0  | 3   | 21  | 0 |
| Refraction disorders                       | 46 | 54  | 27 | 17   | 39 | 18  | 31  | 0 |
| Rheumatic heart disease                    | 2  | 28  | 1  | 38   | 2  | 32  | 36  | 0 |
| Rheumatoid arthritis                       | 1  | 2   | 2  | 1    | 1  | 1   | 1   | 7 |
| Scabies                                    | 6  | 162 | 5  | 54   | 13 | 31  | 76  | 0 |
| Schistosomiasis                            | 0  | 10  | 0  | 68   | 0  | 37  | 14  | 0 |

## Volodina et al., Public health relevance of medicines developed under paediatric legislation in Europe and the United States: a systematic mapping study

|                                                     |     |      |     |     |      |      |      |   |
|-----------------------------------------------------|-----|------|-----|-----|------|------|------|---|
| Schizophrenia                                       | 2   | 2    | 1   | 2   | 2    | 2    | 2    | 5 |
| Seborrhoeic dermatitis                              | 2   | 2    | 2   | 3   | 1    | 3    | 3    | 0 |
| Self-harm and interpersonal violence                | 70  | 279  | 90  | 133 | 171  | 321  | 240  | 1 |
| Sickle cell disorders                               | 0   | 31   | 1   | 82  | 0    | 3    | 122  | 0 |
| Sickle cell trait                                   | 1   | 6    | 0   | 86  | 0    | 2    | 43   | 0 |
| Silicosis                                           | 0   | 0    | 0   | 0   | 0    | 0    | 0    | 0 |
| Stomach cancer                                      | 0   | 0    | 0   | 0   | 0    | 0    | 0    | 0 |
| Subarachnoid hemorrhage                             | 3   | 21   | 5   | 4   | 6    | 3    | 18   | 0 |
| Sudden infant death syndrome                        | 102 | 45   | 68  | 87  | 102  | 135  | 125  | 0 |
| Syphilis                                            | 0   | 37   | 0   | 419 | 2    | 1321 | 371  | 0 |
| Tension-type headache                               | 13  | 18   | 17  | 11  | 17   | 12   | 13   | 0 |
| Testicular cancer                                   | 4   | 3    | 4   | 1   | 3    | 3    | 3    | 0 |
| Tetanus                                             | 0   | 2    | 0   | 384 | 0    | 3    | 89   | 4 |
| Thalassemiias                                       | 4   | 6    | 2   | 0   | 9    | 5    | 28   | 0 |
| Thalassemiias trait                                 | 3   | 7    | 0   | 5   | 8    | 5    | 56   | 0 |
| Thyroid cancer                                      | 1   | 1    | 1   | 1   | 1    | 1    | 1    | 1 |
| Tracheal, bronchus, and lung cancer                 | 1   | 1    | 1   | 0   | 0    | 0    | 1    | 0 |
| Trachoma                                            | 0   | 0    | 0   | 0   | 0    | 0    | 0    | 0 |
| Transport and other unintentional injuries          | 683 | 1168 | 435 | 825 | 1085 | 1432 | 1482 | 0 |
| Trichomoniasis                                      | 0   | 0    | 0   | 0   | 0    | 0    | 0    | 0 |
| Trichuriasis                                        | 0   | 4    | 0   | 3   | 0    | 4    | 4    | 0 |
| Turner syndrome                                     | 0   | 0    | 0   | 0   | 0    | 0    | 0    | 0 |
| Typhoid fever                                       | 0   | 0    | 0   | 359 | 0    | 3    | 275  | 0 |
| Upper respiratory infections                        | 132 | 154  | 144 | 154 | 100  | 106  | 114  | 0 |
| Urinary tract infections and interstitial nephritis | 5   | 48   | 5   | 7   | 10   | 4    | 23   | 0 |
| Urogenital congenital anomalies                     | 28  | 84   | 29  | 33  | 25   | 26   | 50   | 0 |
| Urolithiasis                                        | 0   | 0    | 0   | 0   | 1    | 0    | 0    | 0 |
| Urticaria                                           | 71  | 80   | 88  | 80  | 133  | 81   | 80   | 2 |

Volodina et al., Public health relevance of medicines developed under paediatric legislation in Europe and the United States: a systematic mapping study

|                               |     |     |     |     |     |     |     |   |
|-------------------------------|-----|-----|-----|-----|-----|-----|-----|---|
| Uterine cancer                | 0   | 0   | 0   | 0   | 0   | 0   | 0   | 0 |
| Uterine fibroids              | 0   | 0   | 0   | 0   | 1   | 0   | 0   | 0 |
| Varicella and herpes zoster   | 4   | 27  | 3   | 36  | 8   | 19  | 30  | 1 |
| Vascular intestinal disorders | 1   | 2   | 1   | 1   | 2   | 1   | 2   | 0 |
| Viral skin diseases           | 204 | 105 | 326 | 175 | 104 | 121 | 122 | 0 |
| Visceral leishmaniasis        | 0   | 70  | 0   | 49  | 0   | 0   | 14  | 0 |
| Vitamin A deficiency          | 0   | 29  | 1   | 110 | 0   | 22  | 51  | 0 |
| Whooping cough                | 4   | 17  | 7   | 478 | 1   | 593 | 515 | 4 |
| Yellow fever                  | 0   | 0   | 0   | 6   | 0   | 0   | 8   | 0 |
| Zika virus                    | 0   | 0   | 0   | 0   | 0   | 0   | 0   | 0 |

Volodina et al., Public health relevance of medicines developed under paediatric legislation in Europe and the United States: a systematic mapping study

**Supplement 2. Paediatric indications not mapped with Disability Adjusted Life Year cause**

| N | Approved indication in EU/US                                                                                                                                                                  | Assigned ICD 10 classification                                                 |
|---|-----------------------------------------------------------------------------------------------------------------------------------------------------------------------------------------------|--------------------------------------------------------------------------------|
| 1 | Maintenance of anesthesia in non-intubated patients                                                                                                                                           | Z00-Z13 Persons encountering health services for examination and investigation |
| 2 | Adjunct to general anesthesia                                                                                                                                                                 |                                                                                |
| 3 | Contrast agent for intravenous use with magnetic resonance imaging                                                                                                                            |                                                                                |
| 4 | Diagnostic evaluation of tissue pathologies with contrast-enhanced magnetic resonance imaging                                                                                                 |                                                                                |
| 5 | Emergency contraception within 120 hours (5 days) of unprotected sexual intercourse or contraceptive failure                                                                                  | Z30 Contraceptive management                                                   |
| 6 | Oral contraception                                                                                                                                                                            |                                                                                |
| 7 | Management of mild to moderate pain and the management of moderate to severe pain as an adjunct to opioid analgesics, and for the reduction of fever in pediatric patients 6 months and older | R52 Pain, not elsewhere classified                                             |
| 8 | Management of pain severe enough to require daily, around the-clock, long-term opioid treatment in pediatric patients 11 years and older                                                      |                                                                                |

# BMJ Paediatrics Open

## Public health relevance of medicines developed under paediatric legislation in Europe and the United States: a systematic mapping study

|                               |                                                                                                                                                                                                                                                           |
|-------------------------------|-----------------------------------------------------------------------------------------------------------------------------------------------------------------------------------------------------------------------------------------------------------|
| Journal:                      | <i>BMJ Paediatrics Open</i>                                                                                                                                                                                                                               |
| Manuscript ID                 | bmjpo-2023-002455.R1                                                                                                                                                                                                                                      |
| Article Type:                 | Original research                                                                                                                                                                                                                                         |
| Date Submitted by the Author: | 13-Mar-2024                                                                                                                                                                                                                                               |
| Complete List of Authors:     | Volodina, Anna; Heidelberg University, Heidelberg Institute of Global Health<br>Jahn, Albrecht; Heidelberg University, Heidelberg Institute of Global Health<br>Jahn, Rosa; University Hospital Heidelberg, Section for Health Equity Studies & Migration |
| Keywords:                     | Therapeutics, Child Health, Health Policy                                                                                                                                                                                                                 |
|                               |                                                                                                                                                                                                                                                           |

SCHOLARONE™  
Manuscripts

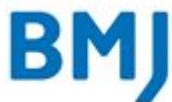

I, the Submitting Author has the right to grant and does grant on behalf of all authors of the Work (as defined in the below author licence), an exclusive licence and/or a non-exclusive licence for contributions from authors who are: i) UK Crown employees; ii) where BMJ has agreed a CC-BY licence shall apply, and/or iii) in accordance with the terms applicable for US Federal Government officers or employees acting as part of their official duties; on a worldwide, perpetual, irrevocable, royalty-free basis to BMJ Publishing Group Ltd ("BMJ") its licensees and where the relevant Journal is co-owned by BMJ to the co-owners of the Journal, to publish the Work in this journal and any other BMJ products and to exploit all rights, as set out in our [licence](#).

The Submitting Author accepts and understands that any supply made under these terms is made by BMJ to the Submitting Author unless you are acting as an employee on behalf of your employer or a postgraduate student of an affiliated institution which is paying any applicable article publishing charge ("APC") for Open Access articles. Where the Submitting Author wishes to make the Work available on an Open Access basis (and intends to pay the relevant APC), the terms of reuse of such Open Access shall be governed by a Creative Commons licence – details of these licences and which [Creative Commons](#) licence will apply to this Work are set out in our licence referred to above.

Other than as permitted in any relevant BMJ Author's Self Archiving Policies, I confirm this Work has not been accepted for publication elsewhere, is not being considered for publication elsewhere and does not duplicate material already published. I confirm all authors consent to publication of this Work and authorise the granting of this licence.



## Public health relevance of medicines developed under paediatric legislation in Europe and the United States: a systematic mapping study

Anna Volodina<sup>1</sup>, Albrecht Jahn<sup>1</sup>, Rosa Jahn<sup>2</sup>

**Corresponding author details:** Anna Volodina, Heidelberg Institute of Global Health, Heidelberg University, Im Neuenheimer Feld 130.3, 69120 Heidelberg, Germany. Email: [anna.volodina@uni-heidelberg.de](mailto:anna.volodina@uni-heidelberg.de)

<sup>1</sup> Heidelberg Institute of Global Health, Heidelberg University, Heidelberg, Germany.

<sup>2</sup> Section for Health Equity Studies & Migration, University Hospital Heidelberg, Heidelberg, Germany

[Anna.Volodina@uni-heidelberg.de](mailto:Anna.Volodina@uni-heidelberg.de)

[Albrecht.Jahn@uni-heidelberg.de](mailto:Albrecht.Jahn@uni-heidelberg.de)

[RosaHelene.Jahn@med.uni-heidelberg.de](mailto:RosaHelene.Jahn@med.uni-heidelberg.de)

Word count: 3184 out of max 2500

Table count: 6

### Abstract—296 out of max 300 words

#### *Background*

Legislation in the European Union (EU) and the United States (US) promoting the development of paediatric medicines has contributed to new treatments for children. This study explore show such legislation responds to paediatric health needs in different country settings and globally, and whether it should be considered for wider implementation.

#### *Methods*

We searched EU and US regulatory databases for medicines with approved indications resulting from completed paediatric development between 2007 and 2018. Of 195 medicines identified, 187 could be systematically mapped to the burden of the target disease for six study countries (Australia, Brazil, Canada, Kenya, Russia, South Africa) and globally, using Disability Adjusted Life Years (DALYs). All medicines were also screened for inclusion on the World Health Organisation Model List of Essential Medicines (EML) and the EML for children under 13 years (EMLc).

#### *Results*

The studied medicines were disproportionately focused on non-communicable diseases, which represented 68% of medicines and 21% of global paediatric DALYs. On the other hand, we found 28% of medicines for communicable, maternal, neonatal and nutritional disorders, representing 73% of global paediatric DALYs. Neonatal disorders, and malaria were mapped with 2 medicines, tuberculosis and neglected tropical diseases with none. The gap between medicines and paediatric DALYs was greater in countries with lower income. Still, 34% of medicines are included in the EMLc and 48% in the EML.

#### *Conclusions*

Paediatric policies in the EU and US are only partially responsive to paediatric health needs. To be considered for wider implementation, paediatric incentives and obligations should be more targeted towards paediatric health needs. International harmonisation of legislation and alignment with global research priorities could further strengthen its impact on child health and support ongoing efforts to improve access to medicines. Furthermore, efforts should be made to ensure global access to authorised paediatric medicines.

### What is already known on this topic

Paediatric legislation in the European countries and the United States has stimulated research and development of medicines for children. According to impact assessments, the number of paediatric medicines in these has increased. However, there are no studies to assess the potential impact on the childhood burden of disease beyond these countries and globally.

### What this study adds

Emerging treatments do not reflect the disease burden in high-income countries and diverge even further from the needs in resource-constrained settings. Nevertheless, they offer more treatment options for select high-burden conditions, such as universally occurring infections and debilitating non-communicable diseases. They are also important contributors to the WHO lists of essential medicines. To achieve a better public health impact paediatric legislation should be expanded internationally, harmonised and tailored to global research priorities in children.

### How this study might affect research, practice or policy

The study informs ongoing and future regulatory reform processes and especially the current revision of the EU Paediatric Legislation, to support the development of more impactful policies.

**Keywords:** access to medicines, paediatric legislation, unmet needs, burden of disease

### Introduction

Access to medicines remains a key priority of the United Nations Sustainable Development Goals (SDGs) aiming to secure healthy well-being (1). The SDGs recognise the need to promote research and development (R&D) of missing medicines and vaccines, especially for low- and middle-income countries (LMICs)(2). Children are particularly affected by the continuing lack of R&D and quality, safe and effective medicines globally (3-5). To improve paediatric care, the European Union (EU) and the United States (US) introduced paediatric medicines legislation in 2007 and 1997, respectively. This legislation is based on a combination of obligations and incentives. Pharmaceutical companies are required to conduct paediatric investigations for new medicines including those intended for use in adults, receiving patent extensions in return (6-7). Research has shown that there has been an increase in paediatric labelling and formulations in both regions since the legislation was introduced (8-11). These findings suggest that similar legislation may be used to improve paediatric medicines availability and access in other regions.

However, one concern regarding EU/US paediatric legislation is that the paediatric R&D it encourages may not meet paediatric needs, thus limiting its practical benefits for paediatric care (9). Exploring the responsiveness of paediatric legislation to the health needs of children globally and in different countries is therefore crucial for understanding its potential for wider implementation. To our knowledge, there have been no systematic comparisons between paediatric medicines and paediatric needs beyond the implementing regions in relation to paediatric legislation so far. Addressing this gap, we map the spectrum of new paediatric medicines developed under paediatric legislation in the EU and US to the burden of the target diseases in six countries of diverse income levels (Australia, Brazil, Canada, Kenya, Russia, South Africa) and globally. As a measure of disease burden, we use Disability Adjusted Life Years (DALYs), which quantify the loss of health by combining years of life lost plus years lived with disability (12). In addition, we assess the inclusion of the studied medicines in the World Health Organisation (WHO) Model List of Essential Medicines (EML) as an indicator of their relevance to paediatric health needs relative to existing medical products. Based on

1  
2  
3 this assessment, the paper examines the role of paediatric legislation for paediatric care in the  
4 international context.  
5

## 6 **Methods**

### 7 *Study context*

8  
9  
10 This analysis is part of a larger study of paediatric regulatory policies and their implications for  
11 universal access. The selection of countries aimed for variability in geographical context, economic  
12 development, as well as regulatory and health systems. The selection was constrained by data  
13 collection considerations of the wider project, such as the availability of open access data on  
14 medicine labelling (for more information, see (13)). After an initial assessment, Australia, Brazil,  
15 Canada, Kenya, Russia and South Africa were selected for analysis. For the present paper, we applied  
16 a systematic mapping approach to ensure rigour, reduce bias, and to gain a comprehensive overview  
17 over the medicine development landscape under the EU/US legislation.  
18  
19

### 20 *Sample of medicines developed under paediatric legislation*

21  
22 The medicines included in this review were identified from the open access databases of medicines  
23 maintained by the Food and Drug Administration (FDA) and the European Medicines Agency (EMA)  
24 (14-15). The databases were downloaded and filtered for all medicines with approved indications  
25 resulting from paediatric development completed between 1 January 2007 and 31 December 2018.  
26 Paediatric development was indicated by completed Paediatric Investigations Plans (EMA) or  
27 approved paediatric labelling (FDA). The variables required for this study (approved indications,  
28 approved formulations) were included in the FDA database, so no additional data extraction was  
29 necessary. For the EMA database, information regarding these variables had to be extracted by hand  
30 from the individual medicine's entry on the EMA website (16). Data used for this analysis was cross-  
31 checked with other sources to ensure reliability. Lastly, medicines withdrawn for safety reasons,  
32 duplicates and medicines without an approved indication were excluded, and database entries that  
33 belonged to the same medicine were consolidated (for more information, see (13)). For the present  
34 analysis, the sampling included medicines authorised in any EU country as opposed to only those  
35 approved in all EU countries, resulting in a larger sample than in (13). For the included medicines  
36 from the FDA, a random sample of 22% was drawn. The total sample comprised 195 medicines, 127  
37 from the EU and 68 from the US.  
38  
39  
40  
41

### 42 *Indicators of the public health relevance*

43  
44 To assess the responsiveness of the EU/US paediatric legislation to paediatric health needs, we 1)  
45 mapped the sampled medicines to the DALYs of the target condition(s) and 2) reviewed their EML  
46 status.  
47

48  
49 The burden of disease assessment was based on DALY data from the 2019 Global Burden of Diseases  
50 (GBD) results published by the Institute for Health Metrics and Evaluation (IHME) (17). The GBD  
51 results are organised hierarchically with mutually exclusive diseases or conditions that cause death or  
52 disability referred to as "DALY cause". There are 4 hierarchical levels of DALY causes, starting with  
53 three categories at the first level: [1] communicable, maternal, neonatal, and nutritional causes  
54 (CMNN); [2] non-communicable diseases (NCDs); and [3] Injuries. The fourth level includes individual  
55 conditions or pooled categories as the most detailed causes. As example, see the levels for "typhoid  
56 fever" provided in the "GBD concepts and terms defined": "Level 1: CMNN; Level 2: enteric  
57 infections; Level 3: typhoid and paratyphoid; Level 4: typhoid fever" (18).  
58  
59  
60

The responsiveness to paediatric health needs considering existing treatments was assessed by reviewing medicines' status in the WHO EML and the and EML for children under 13 years of age (EMLc). Both EMLs have a core and a complementary list, representing the needs of basic and specialised healthcare systems respectively (19).

#### Data analysis

The sampled medicines were matched to the International Classification of Disease code corresponding to the target diseases using the open access online electronic International Statistical Classification of Diseases and Related Health Problems 10<sup>th</sup> Revision (ICD-10) (20). Code matching was based on the target disease in the approved indication with the ICD-10 code specification up to the first three or four characters. Medicines with more than one indication were matched with multiple ICD-10 codes.

The codes obtained were mapped to the most detailed DALY causes in children (0 – 14 years, total DALYs and rate) for each country and globally. Mapping was done using the online IHME tool (21). The mapping process is shown in Figure 1. The mapping results to the most detailed DALY causes can be found in supplement 1.

For analysis and reporting, the mapping results were aggregated to DALY cause level 2. For relevant compound level 2 categories, level 3 DALY causes were used instead to ensure sufficient detail (see Table 1).

**Table 1: Overview of compound level 2 DALYS causes and corresponding Level 3 DALYS causes utilised for mapping**

| Compound Level 2 DALY causes                            | Level 3 DALY causes utilised for mapping                                                                                                                                                                                                    |
|---------------------------------------------------------|---------------------------------------------------------------------------------------------------------------------------------------------------------------------------------------------------------------------------------------------|
| Other non-communicable diseases                         | congenital birth defects; urinary diseases and male infertility; gynaecological diseases; sudden infant death syndrome; oral disorders; endocrine, metabolic, blood and immune disorders ("EMBI"); hemoglobinopathies & haemolytic anaemias |
| Respiratory infections and tuberculosis (TB)            | Respiratory infections excl. TB;<br>Tuberculosis                                                                                                                                                                                            |
| Neglected tropical diseases (NTDs) and malaria          | NTDs excl. malaria;<br>Malaria                                                                                                                                                                                                              |
| HIV/AIDs and other sexually transmitted diseases (STDs) | STDs excl. HIV/AIDS;<br>HIV/AIDS                                                                                                                                                                                                            |
| Maternal and neonatal disorders                         | Maternal disorders;<br>Neonatal disorders                                                                                                                                                                                                   |

Results were calculated as percentages (proportions) according to the rounding rules and organised according to the level 1DALY causes (Tables 2-4). The colour code was generated automatically using the XLS function of conditional formatting.

Mutually exclusive thematic categories were developed for medicines mapped with <0,05 DALYs to distinguish between global or national lack of measurable burden (Table 5).

The INN search of the full sample was performed in the 23<sup>rd</sup> EML and the 9<sup>th</sup> EMLc from 2023. To account for the difference in the paediatric population between the EMLc (up to 13 years) and paediatric legislation (up to 18 years), and to capture essential medicines for adolescents, we included the EML in our review. When the EMLs included the Anatomical Therapeutic Chemical (ATC)

subgroup as a therapeutic alternative, it was searched using the online ATC database (22). Assignment to the core or the complementary list was recorded.

Descriptive tables, figures and statistics were generated using MS Excel.

**Patient and Public involvement**

Patients or the public were not involved in the design, or conduct, or reporting, or dissemination plans of our research.

**Results:**

*Burden of disease mapping*

The 195 medicines were matched with 101 ICD-10 codes, allowing a DALY mapping for 187 medicines. For 3 ICD-10 codes no DALY cause could be found in the online DALY tool, and 8 medicines were excluded from the analysis (supplement 2). In total, 61 (21%) of the 293 most detailed DALY causes were mapped to at least one medicine in the sample. A total of 128 medicines (68%) were mapped to NCDs which captured 21% of the global disease burden (30 031 DALYs). 52 medicines (28%) were mapped to CMNN diseases, which captured 73% of the global disease burden (21 915 DALYs). Two medicines with multiple indications were mapped to both, communicable and non-communicable disease groups. And lastly, 9 medicines (5%) were mapped to injuries, which captured 6% (1783 DALYs) of the global disease burden.

In the following, we present the results of the systematic mapping of medicines to GBD DALYs by the three level 1 causes CMNN, NCDs and Injuries in order of global disease burden (see Tables 2-4).

Table 2 presents the mapping results for CMNN diseases and includes 52 medicines (28%) of all mapped medicines, of which 7 were mapped to more than one cause. The CMNN DALY cause with the highest burden across all countries and globally was “neonatal disorders” with 8883 global CMNN DALYs (41% of all respective DALYs). It was mapped to 2 (2%) CMNN medicines, both Streptococcus pneumoniae vaccines. Malaria with 1820 (8%) global CMNN DALYs was mapped to 2 medicines, tuberculosis with 311 (1%) global CMNN DALYs and neglected tropical diseases with 290 (1%) global CMNN DALYs was mapped to none. Overall, “other infectious diseases”, “HIV/AIDS” and “respiratory Infections excl. TB” were each mapped to 15 or more medicines, by far the highest number. “Other infectious diseases” with 1952 (9%) global CMNN DALYs was mapped to 19 (37%) CMNN medicines. 12 of them were for hepatitis B or C, bacteraemia, cytomegalovirus and invasive fungal infections, 7 were multicomponent childhood vaccines.

The Table 2 also shows that middle-income countries bear a higher burden of infectious diseases, nutritional deficiencies, and neonatal disorders.

**Table 2. Medicines for children (N=52) mapped to communicable diseases, maternal, neonatal disorders and nutritional (CMNN)diseases, with corresponding disease burden ranked by global burden.**

| DALY cause          | DALYs per 100 000, 0-14 years, 2019 [% of total burden of DALYs attributed to CMNN diseases] |              |              |              |              |               |              | Mapped Medicines, n [% of CMNN mapped medicines] |
|---------------------|----------------------------------------------------------------------------------------------|--------------|--------------|--------------|--------------|---------------|--------------|--------------------------------------------------|
|                     | AU                                                                                           | BR           | CA           | KE           | RU           | SA            | Global       |                                                  |
| Neonatal disorders* | 1139<br>[69]                                                                                 | 5907<br>[66] | 1543<br>[76] | 9000<br>[34] | 1456<br>[52] | 10669<br>[45] | 8883<br>[41] | 2<br>[4]                                         |

|                                                                                                                                                                                                                                                                                                                                                 |               |              |               |              |               |               |              |            |
|-------------------------------------------------------------------------------------------------------------------------------------------------------------------------------------------------------------------------------------------------------------------------------------------------------------------------------------------------|---------------|--------------|---------------|--------------|---------------|---------------|--------------|------------|
| Respiratory infections excl. TB                                                                                                                                                                                                                                                                                                                 | 221<br>[13]   | 1199<br>[13] | 226<br>[11]   | 3330<br>[13] | 543<br>[20]   | 2687<br>[11]  | 3360<br>[15] | 16<br>[31] |
| Enteric infections                                                                                                                                                                                                                                                                                                                              | 76<br>[5]     | 566<br>[6]   | 139<br>[7]    | 5238<br>[20] | 228<br>[8]    | 2550<br>[11]  | 3241<br>[15] | 6<br>[12]  |
| Other infectious diseases                                                                                                                                                                                                                                                                                                                       | 81<br>[5]     | 300<br>[3]   | 71<br>[3]     | 1856<br>[7]  | 231<br>[8]    | 1474<br>[6]   | 1952<br>[9]  | 19<br>[37] |
| Malaria*                                                                                                                                                                                                                                                                                                                                        | < 0.05<br>[0] | 7<br>[0]     | < 0.05<br>[0] | 2450<br>[9]  | < 0.05<br>[0] | 40<br>[0]     | 1820<br>[8]  | 2<br>[4]   |
| Nutritional deficiencies                                                                                                                                                                                                                                                                                                                        | 117<br>[7]    | 601<br>[7]   | 53<br>[3]     | 1705<br>[6]  | 135<br>[5]    | 1155<br>[5]   | 1344<br>[6]  | 1<br>[2]   |
| STDs excl. HIV                                                                                                                                                                                                                                                                                                                                  | 1<br>[0]      | 37<br>[0]    | < 0.05<br>[0] | 420<br>[2]   | 2<br>[0]      | 1321<br>[6]   | 371<br>[2]   | 2<br>[2]   |
| HIV/AIDS*                                                                                                                                                                                                                                                                                                                                       | 2<br>[0]      | 79<br>[1]    | 4<br>[0]      | 1875<br>[7]  | 150<br>[5]    | 3072<br>[13]  | 338<br>[2]   | 15<br>[29] |
| Tuberculosis*                                                                                                                                                                                                                                                                                                                                   | 1<br>[0]      | 26<br>[0]    | 1<br>[0]      | 220<br>[1]   | 16<br>[1]     | 621<br>[3]    | 311<br>[1]   | 0<br>[0]   |
| NTDs excl Malaria                                                                                                                                                                                                                                                                                                                               | 13<br>[1]     | 171<br>[2]   | 4<br>[0]      | 241<br>[1]   | 16<br>[1]     | 96<br>[0]     | 290<br>[1]   | 0<br>[0]   |
| Maternal disorders                                                                                                                                                                                                                                                                                                                              | < 0.05<br>[0] | 3<br>[0]     | < 0.05<br>[0] | 5<br>[0]     | < 0.05<br>[0] | < 0.05<br>[0] | 4<br>[0]     | 0<br>[0]   |
| Total burden                                                                                                                                                                                                                                                                                                                                    | 1651          | 8 897        | 2041          | 26340        | 2777          | 23685         | 21915        |            |
|  <p>Lower DALYs                      Higher DALYs                      Fewer medicines                      More medicines</p> <p>All DALY causes aggregated at the second level unless marked with *<br/>* - DALY causes aggregated to the third level</p> |               |              |               |              |               |               |              |            |

DALY Source: Institute for Health Metrics and Evaluation. Used with permission. All rights reserved.

Table 3 presents the DALY mapping for NCDs, which includes 128 (68%) of medicines, of which 9 are mapped to more than one cause. The burden of disease distribution did not reveal striking differences between the countries or globally. The DALY cause with the highest burden was “congenital birth defects” with 2394 (38%) NCD DALYs globally. It was mapped to 2 medicines for paediatric glaucoma. Several high-burden DALY causes were well represented in the sample, such as “skin and subcutaneous diseases” with 627 (10%) global NCD DALYs and 13 (10%) NCD treatments, “neurological disorders” with 443 (7%) global NCD DALYs and 15 (12%) NCD treatments. However, most NCD medicines (23%) were mapped to the DALY cause “EMBI”, which accounted for 3% NCD DALYs globally. The most targeted “EMBI” indications were anaemia, rare coagulation and metabolic disorders.

For several NCD DALY causes at level 2 and 3, medicines were indicated for a few conditions. For example, in “musculoskeletal disorders” 7 out of 8 medicines were for juvenile arthritis. In “chronic respiratory diseases” 8 medicines were for allergic rhinitis and the remaining 5 for asthma. “Diabetes and kidney diseases” was mapped exclusively to insulins.

**Table 3. Medicines for children mapped to non-communicable diseases (N=128) with corresponding disease burden ranked by global burden.**

|  | DALYs per 100 000, 0-14 years, 2019 [% of total burden of DALYs attributed to NCD] | Mapped Medicines, n [% of mapped NCD medicines] |
|--|------------------------------------------------------------------------------------|-------------------------------------------------|
|  |                                                                                    |                                                 |



| DALY cause                                     | AU          | BR           | CA          | KE           | RU           | SA           | Global       |            |
|------------------------------------------------|-------------|--------------|-------------|--------------|--------------|--------------|--------------|------------|
| Congenital birth defects*                      | 720<br>[18] | 3077<br>[41] | 809<br>[21] | 1734<br>[34] | 1108<br>[27] | 1653<br>[35] | 2394<br>[38] | 2<br>[2]   |
| Skin & subcutaneous diseases                   | 715<br>[18] | 735<br>[10]  | 759<br>[20] | 601<br>[12]  | 768<br>[19]  | 504<br>[11]  | 627<br>[10]  | 13<br>[10] |
| Mental disorders                               | 822<br>[21] | 766<br>[10]  | 625<br>[16] | 512<br>[10]  | 491<br>[10]  | 516<br>[11]  | 587<br>[9]   | 8<br>[6]   |
| Neurological disorders                         | 317<br>[8]  | 685<br>[9]   | 330<br>[8]  | 382<br>[8]   | 314<br>[8]   | 391<br>[8]   | 433<br>[7]   | 15<br>[12] |
| Neoplasms                                      | 220<br>[6]  | 484<br>[7]   | 251<br>[6]  | 295<br>[6]   | 308<br>[8]   | 173<br>[4]   | 426<br>[7]   | 10<br>[8]  |
| Digestive diseases                             | 42<br>[1]   | 195<br>[3]   | 54<br>[1]   | 221<br>[4]   | 115<br>[3]   | 161<br>[3]   | 284<br>[4]   | 10<br>[8]  |
| Hemoglobinopathies & hemolytic anemias*        | 12<br>[0]   | 79<br>[1]    | 8<br>[0]    | 189<br>[4]   | 22<br>[1]    | 34<br>[1]    | 280<br>[4]   | 3<br>[2]   |
| Chronic respiratory disease                    | 479<br>[12] | 461<br>[6]   | 326<br>[8]  | 273<br>[5]   | 173<br>[4]   | 340<br>[7]   | 267<br>[4]   | 13<br>[10] |
| Cardiovascular diseases                        | 46<br>[1]   | 222<br>[3]   | 59<br>[2]   | 187<br>[4]   | 76<br>[2]    | 159<br>[3]   | 233<br>[4]   | 7<br>[5]   |
| Endocrine, metabolic, blood, immune disorders* | 167<br>[4]  | 161<br>[2]   | 134<br>[3]  | 79<br>[2]    | 154<br>[4]   | 186<br>[4]   | 159<br>[3]   | 29<br>[23] |
| Sense organ diseases                           | 104<br>[3]  | 147<br>[2]   | 72<br>[2]   | 196<br>[4]   | 133<br>[3]   | 197<br>[4]   | 157<br>[2]   | 12<br>[9]  |
| Sudden infant death syndrome*                  | 102<br>[3]  | 45<br>[1]    | 68<br>[2]   | 87<br>[2]    | 102<br>[3]   | 135<br>[3]   | 125<br>[2]   | 0<br>[0]   |
| Musculoskeletal disorders                      | 126<br>[3]  | 161<br>[2]   | 218<br>[6]  | 80<br>[2]    | 160<br>[4]   | 74<br>[2]    | 123<br>[2]   | 8<br>[6]   |
| Diabetes and kidney disease                    | 25<br>[1]   | 92<br>[1]    | 39<br>[1]   | 79<br>[2]    | 61<br>[2]    | 93<br>[2]    | 122<br>[2]   | 5<br>[4]   |
| Oral disorders*                                | 50<br>[1]   | 55<br>[1]    | 50<br>[1]   | 52<br>[1]    | 57<br>[1]    | 52<br>[1]    | 54<br>[1]    | 1<br>[1]   |
| Urinary diseases and male infertility*         | 8<br>[0]    | 52<br>[1]    | 9<br>[0]    | 24<br>[0]    | 14<br>[0]    | 11<br>[0]    | 35<br>[0,5]  | 1<br>[1]   |
| Gynecological diseases*                        | 22<br>[1]   | 24<br>[0]    | 23<br>[1]   | 25<br>[0]    | 22<br>[1]    | 22<br>[1]    | 24<br>[0,3]  | 1<br>[1]   |
| Substance use disorders                        | 8<br>[0]    | 5<br>[0]     | 13<br>[0]   | 2<br>[0]     | 4<br>[0]     | 2<br>[0]     | 3<br>[0]     | 0<br>[0]   |
| Total burden                                   | 3 985       | 7 446        | 3 847       | 5 018        | 4 082        | 4 704        | 6 333        |            |

Lower DALYs                      Higher DALYs                      Fewer medicines                      More medicines

All DALY causes aggregated at the second level unless marked with \*  
 \* - DALY causes aggregated to the third level

*DALY Source: Institute for Health Metrics and Evaluation. Used with permission. All rights reserved.*

Table 4 shows the mapping results for the level 1 DALY group “Injuries”, which was mapped with 9 (5%) of all mapped medicines. 8 medicines addressed complications of medical treatment and were

mapped to “unintentional injuries”. One medicine in the “self-harm and interpersonal violence” was indicated to prevent organ transplant rejection. The DALY distribution for injuries was higher in the middle-income countries.

**Table 4. Medicines for children (N=9) mapped to injuries with corresponding disease burden ranked by global burden.**

| DALY cause                           | DALYs per 100 000, 0-14 years, 2019 [% of total burden of DALYs attributed to Injuries] |             |             |             |             |             |              | Mapped Medicines, n [% of injury mapped medicines] |
|--------------------------------------|-----------------------------------------------------------------------------------------|-------------|-------------|-------------|-------------|-------------|--------------|----------------------------------------------------|
|                                      | AU                                                                                      | BR          | CA          | KE          | RU          | SA          | Global       |                                                    |
| Unintentional injuries               | 574<br>[74]                                                                             | 838<br>[56] | 308<br>[57] | 659<br>[65] | 851<br>[67] | 923<br>[51] | 1107<br>[62] | 8<br>[89]                                          |
| Transport injuries                   | 130<br>[17]                                                                             | 371<br>[25] | 143<br>[26] | 217<br>[22] | 258<br>[20] | 555<br>[31] | 437<br>[25]  | 0<br>[0]                                           |
| Self-harm and interpersonal violence | 70<br>[9]                                                                               | 279<br>[19] | 90<br>[17]  | 133<br>[13] | 171<br>[13] | 321<br>[18] | 240<br>[13]  | 1<br>[11]                                          |
| Total burden                         | 774                                                                                     | 1488        | 541         | 1009        | 1280        | 1799        | 1783         |                                                    |

All DALY causes aggregated at the second level

DALY Source: Institute for Health Metrics and Evaluation. Used with permission. All rights reserved.

In total, 28 medicines were mapped to DALY causes at the most detailed level that had a negligible burden of disease (< 0.05DALYs) (see Table 5). 18 of these medicines targeted conditions uncommon in children in all studied countries and globally. These were either generally rare diseases (e.g., rare tumour), diseases that primarily affect the adult population but are uncommon in children (e.g., hypertension), and human papilloma virus vaccines.

10 medicines were mapped to diseases with a lack of measurable burden in some countries, namely in Australia and Canada.

**Table 5. Medicines (N=28) for conditions with < 0.05 DALYs (0-14 years) with thematic categories**

| Thematic category                             | Paediatric indication                                        | Medicines with respective indication, n |
|-----------------------------------------------|--------------------------------------------------------------|-----------------------------------------|
| No measurable burden in all studied countries | Hypertension                                                 | 6                                       |
|                                               | Type II diabetes mellitus                                    | 5                                       |
|                                               | HPV infection                                                | 2                                       |
|                                               | Immediate reduction of blood pressure in hypertensive crisis | 1                                       |
|                                               | Multiple sclerosis                                           | 1                                       |
|                                               | Subependymal giant cell astrocytoma                          | 1                                       |
|                                               | Infantile haemangioma                                        | 1                                       |
|                                               | Heavy menstrual bleeding                                     | 1                                       |
| No                                            | Poliomyelitis                                                | 4                                       |



|                                             |                                        |   |
|---------------------------------------------|----------------------------------------|---|
| measurable burden in some studied countries | Diphtheria                             | 4 |
|                                             | Tetanus                                | 4 |
|                                             | Treatment or prevention of hepatitis B | 6 |
|                                             | Malaria                                | 2 |
|                                             | Chronic hepatitis C                    | 1 |

### WHO EMLs review results

Of all 195 sampled medicines 67 (34%) were found in the EMLc and 93 (48%) in the WHO EML (see Table 6), with most medicines included in the core lists. The largest groups were childhood and influenza vaccines, antivirals and antifungals, human immunoglobulins, medicines for blood disorders, and antiretrovirals. Of the 26 medicines included only in the EML, 7 were for adolescent use for mental disorders, emergency contraception or HIV/AIDS pre-exposure prophylaxis.

**Table 6. WHO Essential medicines list inclusion of sampled medicines for children (N=195)**

| WHO List inclusion                             | Number of medicines, n [%] |
|------------------------------------------------|----------------------------|
| <b>Medicines included in the EMLc, 2023</b>    | <b>67 [34]</b>             |
| Out of them:                                   |                            |
| • Medicines in the <i>core list</i>            | <b>45</b>                  |
| Of these, included as therapeutic alternatives | <b>11</b>                  |
| • Medicines in the <i>complementary list</i>   | <b>22</b>                  |
| Of these, included as therapeutic alternatives | <b>5</b>                   |
| <b>Medicines included in the EML, 2023</b>     | <b>93 [48]</b>             |
| Out of them:                                   |                            |
| • Medicines in the <i>core list</i>            | 67                         |
| Of these, included as therapeutic alternatives | 22                         |
| • Medicines in the <i>complementary list</i>   | 26                         |
| Of these, included as therapeutic alternatives | 7                          |

### Discussion

Our study shows that the sampled medicines developed under paediatric legislation in the EU and US area heterogeneous group with a limited responsiveness to children's health needs. Overall, we found a disproportionate focus on NCDs, many of which have a high burden in adults but not in children. Conversely, we found few medicines that address high-burden paediatric diseases, particularly childhood infections. Still, the inclusion of about a third of the sampled medicines in the WHO EMLc suggests that there has been a relevant contribution to paediatric care. Finally, the study identified high-burden diseases with available treatments where access remains limited.

#### *Mismatch between disease burden and spectrum of medicines*

Our findings support previous evidence on the limited alignment between R&D and paediatric needs in the EU and US itself, including the bias towards therapeutic areas with relevant adult indications (23). Studies conducted after the adoption of the EU/US legislation have shown persisting off-labelling prescribing across therapeutic areas (24-25). This evidence, together with our study,

1  
2  
3 suggests that while paediatric legislation may have addressed the needs of children to some extent,  
4 significant gaps remain. The lack of paediatric treatments for poverty-related diseases show that the  
5 gap between the needs and research efforts is most pronounced for children in LMICs.  
6

7  
8 The focus on areas with adult indications found in our study echoes the fact that paediatric  
9 legislation requires developers to assess the potential of medicines primarily developed for adults for  
10 their use in children. However, this policy approach is limited by the lack of alignment between  
11 research efforts and health needs of children and adults in general. A study by the US Congressional  
12 Budget Office suggested that instead of health needs, R&D investment decisions are based on  
13 expected sales, R&D costs, and local policies (26). A study analysing the pharmaceutical pipeline from  
14 2006 to 2011 found that 26% of 2477 medicines were indicated for neoplasms, followed by diseases  
15 of the nervous system and sense organs (13%), infectious and parasitic diseases (11%) and EMBI  
16 disorders (9%) (27). These figures are echoed in the distribution of medicines in our study and do not  
17 reflect the spectrum of the global burden of disease, in adults or children (28).  
18  
19

### 20 *Advancing regulatory policies for children*

21

22  
23 Our results show that there have been some relevant contributions to paediatric care since the  
24 implementation of the EU/US paediatric policies. As such, paediatric policies may be a promising  
25 policy tool to improve availability of appropriate paediatric medicines, provided they are modified to  
26 be more needs-oriented. Such changes would also be beneficial in regions where paediatric  
27 legislation is already in place. For example, the European Commission has recently proposed variable  
28 data protection periods depending on the unmet needs addressed by the medicine (29). Such  
29 measures could strengthen the responsiveness of paediatric legislation to paediatric health needs  
30 and encourage research into conditions relevant to children. Ideally, the assessment of unmet needs  
31 underlying variable protection periods or other measures tied to paediatric needs should be based  
32 on a global assessment of paediatric needs. In addition, the introduction of paediatric legislation in  
33 countries outside of the EU and US should include the harmonisation of regulatory obligations and  
34 rewards to enhance compliance and impact (30). Nonetheless, fostering needs-driven R&D for  
35 paediatric medicines requires complementary financing mechanisms directed at the development of  
36 original paediatric medicines beyond the scope of paediatric legislation. This could be particularly  
37 relevant for off-patent medicines where the incentives of the EU legislation were shown to be  
38 insufficient (23). Efforts to define missing medicines were undertaken in the past (31-32) and could  
39 serve as a sound basis for policy development in this area. Finally, alongside with regulatory policies,  
40 global initiatives and research collaborations such as the Global Accelerator for Paediatric  
41 Formulations Network (GAP-f) and the International Neonatal Consortium will continue to play a  
42 critical role in facilitating development and access to paediatric medicines (33-34).  
43  
44  
45

46  
47 Our study also highlights that successful drug development does not always result in practical use.  
48 For example, Australia and Canada were the only countries with a negligible burden of vaccine-  
49 preventable diseases in our study. These findings underscore the relevance of health system and  
50 other barriers that affect access to existing medicines, particularly in LMICs (35). Reducing access  
51 barriers and increasing coverage of approved medicines is therefore critical. The same applies to  
52 access to surgery, mental health services, and other non-pharmacological interventions, which may  
53 be required to address some of the included paediatric conditions, such as injuries, congenital birth  
54 defects or mental disorders. Our findings also underscore the relevance of diseases related to poor  
55 living conditions and unhealthy environments, including enteric infections and nutritional  
56 deficiencies. Addressing these requires the provision of access to safe water and sanitation, food  
57 security, and health education. Public health interventions beyond pharmaceutical policies thus  
58 remain indispensable in reducing paediatric disease burden and need to continue (36-37).  
59  
60

### *Strengths and limitations*

Our study provides important insights into the responsiveness of paediatric legislation to paediatric health needs countries with diverse disease burden and globally. The study is the first to systematically compare paediatric R&D to paediatric health needs, despite more than a decade since the implementation of paediatric legislation. It offers relevant and novel insights into the potential gains and limitations of paediatric legislation and can support policy-making decisions in the EU and beyond.

This study has several limitations. The exclusion of contraceptives and symptomatic treatments, i.e. pain killers, and the paediatric age group from 15 to 18 years of age from the DALYs mapping may have underestimated the responsiveness of the studied medicines sample to paediatric needs. Some DALY causes, such as injuries, frequently require non-pharmaceutical interventions or surgeries, which may explain the small number of medicines in the sample for such causes. Medicines approved after 2018 were not analysed. The EU/US orphan drug legislation (38) may have contributed to the high number medicines for low-burden diseases, obscuring the relationship to paediatric legislation. Moreover, while our results examine the scope of medicines developed under the paediatric legislation, the lack of a comparison to paediatric R&D before policy implementation limits our ability to assess the direct effect of the legislation. Finally, limitations associated with the use of DALYS apply (39). Research in other geographical regions is recommended to further refine policy recommendations.

### **Conclusion**

Medicines developed under the paediatric legislation in the EU and US are only partially responsive to paediatric health needs and exhibit a disproportionate focus on NCDs. To be considered for wider implementation, paediatric incentives and obligations should therefore be more targeted towards paediatric health needs. International harmonisation of legislation and alignment with global research priorities could further strengthen its impact on child health and support ongoing efforts to improve access to authorised treatments. Finally, health interventions beyond improving access to medicines are needed to achieve a global reduction of paediatric disease burden.

**Figure 1** Process steps of medicines mapping to the Disability Adjusted Life Years with an illustrative example

### **Authorship:**

AV contributed to conceptualization, carried out data collection, analysis, and interpretation, drafted the initial paper, reviewed, and agreed on the final version.

RJ contributed to the data analysis and interpretation, reviewed, revised the manuscript, and agreed on the final version.

AJ contributed to conceptualization, reviewed, commented, and agreed on the final version of the manuscript.

### **Funding Information:**

1  
2  
3 This research received no specific grant from any funding agency in the public, commercial or not-  
4 for-profit sectors.  
5

6 **Research Ethics Approval:**

7  
8 No Ethics Approval  
9

10  
11 **Competing Interests**

12  
13 The authors declare no competing interests.  
14

15  
16 **Acknowledgements**

17  
18 Not applicable  
19

20  
21 **Abbreviations**

22  
23 ATC – Anatomic Therapeutic Chemical

24  
25 CMNN – Communicable, Maternal, Neonatal And Nutritional

26  
27 DALYs – Disability Adjusted Life Years

28  
29 EMA – European Medicines Agency

30  
31 EMBI – Endocrine, metabolic, blood and immune

32  
33 EML – Essential Medicines List

34  
35 EMLc – Essential Medicines List for children

36  
37 EU – European Union

38  
39 FDA – Food and Drug Administration

40  
41 HIV/AIDS – Human Immunodeficiency Virus Infection and Acquired Immunodeficiency Syndrome

42  
43 HPV – Human Papilloma Virus

44  
45 LMICs – Low- and Middle-Income Countries

46  
47 NCDs – Non-Communicable Diseases

48  
49 NTDs – Neglected Tropical Diseases

50  
51 R&D – Research and Development

52  
53 SDG – Sustainable Development Goals

54  
55 STDs – Sexually Transmitted Diseases  
56  
57  
58  
59  
60

1  
2  
3 US – United States

4  
5 WHO – World Health Organization

6  
7  
8 **References**

- 9  
10 1. United Nations. Sustainable Development Goals: Goal 3. Health – United Nations Sustainable  
11 Development . Accessed March 5, 2022.
- 12 2. United Nations. Sustainable Development Goals: Goal 3. Health , target 3b– United Nations  
13 Sustainable Development . Accessed March 5, 2022.
- 14 3. Moulis F, Durrieu G, Lapeyre-Mestre M. Off-label and unlicensed drug use in children  
15 population. *Therapie*. 2018;73(2):135-149. Doi:10.1016/j.therap.2018.02.002
- 16 4. Vieira I, Sousa JJ, Vitorino C. Paediatric Medicines – Regulatory Drivers, Restraints,  
17 Opportunities and Challenges. *J Pharm Sci*. 2021;110(4):1545-1556.  
18 Doi:10.1016/j.xphs.2020.12.036
- 19 5. Van der Veken M, Brouwers J, Budts V, et al. Practical and operational considerations related  
20 to paediatric oral drug formulation: An industry survey. *Int J Pharm*. 2022;618:121670.  
21 Doi:10.1016/j.ijpharm.2022.121670
- 22 6. European Commission. Regulation (EC) No 1901/2006 of the European Parliament and of the  
23 Council of 12 December 2006 on medicinal products for paediatric use and amending  
24 Regulation (EEC) No 1768/92, Directive 2001/20/EC, Directive 2001/83/EC and Regulation  
25 (EC) No 726/2004. 2006. European Commission. EUR-Lex – 32006R1901 – EN – EUR-Lex  
26 (13uropa.eu). Accessed January10, 2022.
- 27 7. Food and Drug Administration. Fact Sheet: Pediatric provisions in the Food and Drug  
28 Administration Safety and Innovation Act (FDASIA). [https://www.fda.gov/regulatory-](https://www.fda.gov/regulatory-information/food-and-drug-administration-safety-and-innovation-act-fdasia/fact-sheet-pediatric-provisions-food-and-drug-administration-safety-and-innovation-act-fdasia)  
29 [information/food-and-drug-administration-safety-and-innovation-act-fdasia/fact-sheet-](https://www.fda.gov/regulatory-information/food-and-drug-administration-safety-and-innovation-act-fdasia/fact-sheet-pediatric-provisions-food-and-drug-administration-safety-and-innovation-act-fdasia)  
30 [pediatric-provisions-food-and-drug-administration-safety-and-innovation-act-fdasia](https://www.fda.gov/regulatory-information/food-and-drug-administration-safety-and-innovation-act-fdasia/fact-sheet-pediatric-provisions-food-and-drug-administration-safety-and-innovation-act-fdasia)  
31 Published March 2018. Accessed April25, 2022.
- 32 8. Rocchi F, Paolucci P, Ceci A, Rossi P. The European paediatric legislation: benefits and  
33 perspectives. *Ital J Pediatr*. 2010;36:56. Published Aug 2010. Doi:10.1186/1824-7288-36-56
- 34 9. European Medicines Agency. 10-year Report to the European Commission. General report on  
35 the experience acquired as a result of the application of the Paediatric Regulation 10-year  
36 Report to the European Commission (Core report) (13uropa.eu). Published August 2017.  
37 Accessed December 5, 2021.
- 38 10. Thaul S. FDA’s Authority to Ensure That Drugs Prescribed to Children Are Safe and Effective.  
39 <https://sgp.fas.org/crs/misc/RL33986.pdf> Published June 25, 2012. Accessed December 18,  
40 2020.
- 41 11. Toma M, Felisi M, Bonifazi D, Bonifazi F, Giannuzzi V, Reggiardo G, de Wildt S, Ceci A; TEDDY  
42 European Network of Excellence for Paediatric Research. Paediatric Medicines in Europe: The  
43 Paediatric Regulation-Is It Time for Reform? *Front Med (Lausanne)*. 2021 Feb 2;8:593281.  
44 doi: 10.3389/fmed.2021.593281. PMID: 33604345; PMCID: PMC7884470.
- 45 12. World Health Organization. Disability-adjusted life years (DALYs).  
46 <https://www.who.int/data/gho/indicator-metadata-registry/imr-details/158>. Accessed  
47 January17, 2023.
- 48 13. Volodina A, Shah-Rohlf R, Jahn A. Does EU and US paediatric legislation improve the  
49 authorization availability of medicines for children in other countries?. *Br J Clin Pharmacol*.  
50 2023;89(3):1056-1066. Doi:10.1111/bcp.15553
- 51  
52  
53  
54  
55  
56  
57  
58  
59  
60

14. European Medicines Agency. Paediatric Investigation Plans - download table. Download medicine data. <https://www.ema.europa.eu/en/medicines/download-medicine-data>. Accessed May 17, 2021
15. Food and Drug Administration. Web BPCA PREA Pediatric Labelling and Studies report. <https://www.fda.gov/media/151598/download>. Accessed September 21, 2021.
16. European Medicines Agency. Medicines. [Medicines | European Medicines Agency \(europa.eu\)](https://www.ema.europa.eu). Accessed May 20, 2022
17. Global Burden of Disease Collaborative Network. Global Burden of Disease Study 2019 (GBD 2019). Seattle, United States: Institute for Health Metrics and Evaluation (IHME), 2020 <https://www.healthdata.org/research-analysis/gbd>. Accessed February 2023.
18. Institute for Health Metrics and Evaluation. Global Burden of Disease (GBD) data and tools guide. <https://www.healthdata.org/research-analysis/about-gbd> Accessed December 17, 2023.
19. World Health Organization. Expert Committee on Selection and Use of Essential Medicines. <https://www.who.int/groups/expert-committee-on-selection-and-use-of-essential-medicines>. Accessed February 17, 2023
20. World Health Organization. International Statistical Classification of Diseases and Related Health Problems 10<sup>th</sup> Revision. <https://icd.who.int/browse10/2016/en> Accessed February 17, 2023
21. Institute for Health Metrics and Evaluation. Global Burden of Disease Study 2019 (GBD 2019) Cause List Mapped to ICD Codes. <https://ghdx.healthdata.org/record/ihme-data/gbd-2019-cause-icd-code-mappings>. Accessed March 2023.
22. WHO Collaborating Centre for Drug Statistics and Methodology. ATC/DDD Index 2023. [https://www.whocc.no/atc\\_ddd\\_index/](https://www.whocc.no/atc_ddd_index/). Last updated January 23, 2023. Accessed March 2023.
23. European Commission. Commission Staff Working Document. Joint evaluation of Regulation (EC) No 1901/2006 of the European Parliament and of the Council of 12 December 2006 on medicinal products for paediatric use and Regulation (EC) No 141/2000 of the European Parliament and of the Council of 16 December 1999 on orphan medicinal products. [https://health.ec.europa.eu/system/files/2020-08/orphan-regulation\\_eval\\_swd\\_2020-163\\_part-1\\_0.pdf](https://health.ec.europa.eu/system/files/2020-08/orphan-regulation_eval_swd_2020-163_part-1_0.pdf). Published August 11, 2020. Accessed February 18, 2023.
24. Netherlands Institute For Health Services Research. Study on off-label use of medicinal products in the European Union. February 2017. [https://www.nivel.nl/sites/default/files/bestanden/Report\\_OFF\\_LABEL\\_Nivel-RIVM-EPHA.pdf](https://www.nivel.nl/sites/default/files/bestanden/Report_OFF_LABEL_Nivel-RIVM-EPHA.pdf). Accessed February 17, 2023.
25. Allen HC, Garbe MC, Lees J, et al. Off-Label Medication use in Children, More Common than We Think: A Systematic Review of the Literature. J Okla State Med Assoc. 2018;111(8):776-783.
26. Congressional Budget Office. Research and Development in the Pharmaceutical Industry. <https://www.cbo.gov/publication/57025>. Published April 8, 2021. Accessed February 20, 2023.
27. Fisher JA, Cottingham MD, Kalbaugh CA. Peering into the pharmaceutical “pipeline”: investigational drugs, clinical trials, and industry priorities. Soc Sci Med. 2015;131:322-330. Doi:10.1016/j.socscimed.2014.08.023
28. Milne CP, Kaitin KI. Are Regulation and Innovation Priorities Serving Public Health Needs?. Front Pharmacol. 2019;10:144. Published 2019 Mar 8. doi:10.3389/fphar.2019.00144



- 1
  - 2
  - 3
  - 4
  - 5
  - 6
  - 7
  - 8
  - 9
  - 10
  - 11
  - 12
  - 13
  - 14
  - 15
  - 16
  - 17
  - 18
  - 19
  - 20
  - 21
  - 22
  - 23
  - 24
  - 25
  - 26
  - 27
  - 28
  - 29
  - 30
  - 31
  - 32
  - 33
  - 34
  - 35
  - 36
  - 37
  - 38
  - 39
  - 40
  - 41
  - 42
  - 43
  - 44
  - 45
  - 46
  - 47
  - 48
  - 49
  - 50
  - 51
  - 52
  - 53
  - 54
  - 55
  - 56
  - 57
  - 58
  - 59
  - 60
29. European Commission. Reform of the EU Pharmaceutical Legislation. [https://health.ec.europa.eu/medicinal-products/pharmaceutical-strategy-europe/reform-eu-pharmaceutical-legislation\\_en](https://health.ec.europa.eu/medicinal-products/pharmaceutical-strategy-europe/reform-eu-pharmaceutical-legislation_en). Published April 26, 2023. Accessed April 30, 2023.
30. Volodina A, Jahn RH, Jahn A. Suitability of paediatric legislation beyond the United States and Europe: a qualitative study on access to paediatric medicines. 2023. Unpublished manuscript in review at BMJ Public Health.
31. World Health Organization. Priority medicines for Europe and the world / Warren Kaplan, Richard Laing. World Health Organization. November 2004. <https://iris.who.int/handle/10665/68769>. Accessed April 30, 2023
32. United Nations Commission On Life-Saving Commodities For Women And Children. [https://www.unfpa.org/sites/default/files/pub-pdf/Final%20UN%20Commission%20Report\\_14sept2012.pdf](https://www.unfpa.org/sites/default/files/pub-pdf/Final%20UN%20Commission%20Report_14sept2012.pdf). August 31, 2012. Accessed April 30, 2023
33. Lewis T, Wade KC, Davis JM. Challenges and opportunities for improving access to approved neonatal drugs and devices. *J Perinatol*. 2022 Jun;42(6):825-828. doi: 10.1038/s41372-021-01304-2. Epub 2022 Feb 7. PMID: 35132149; PMCID: PMC8819193.
34. Penazzato M, Watkins M, Morin S, Lewis L, Pascual F, Vicari M, Lee J, Hargreaves S, Doherty M, Siberry GK. Catalysing the development and introduction of paediatric drug formulations for children living with HIV: a new global collaborative framework for action. *Lancet HIV*. 2018 May;5(5):e259-e264. doi: 10.1016/S2352-3018(18)30005-5. Epub 2018 May 1. PMID: 29739700.
35. Ozawa S, Shankar R, Leopold C, Orubu S. Access to medicines through health systems in low- and middle-income countries. *Health Policy Plan*. 2019;34(Supplement\_3):iii1-iii3. Doi:10.1093/heapol/czz119
36. Stevenson M, Yu J, Hendrie D, et al. Reducing the burden of road traffic injury: translating high-income country interventions to middle-income and low-income countries. *Inj Prev*. 2008;14(5):284-289. Doi:10.1136/ip.2008.018820
37. Gallegos D, Eivers A, Sondergeld P, Pattinson C. Food Insecurity and Child Development: A State-of-the-Art Review. *Int J Environ Res Public Health*. 2021;18(17):8990. Published 2021 Aug 26. Doi:10.3390/ijerph18178990
38. European Commission. Regulation (EC) No 141/2000 Of The European Parliament And Of The Council of 16 December 1999 on orphan medicinal products. <https://eur-lex.europa.eu/legal-content/EN/TXT/PDF/?uri=CELEX:32000R0141&from=EN>. Accessed February 23, 2023.
39. GBD 2019 Diseases and Injuries Collaborators. Global burden of 369 diseases and injuries in 204 countries and territories, 1990-2019: a systematic analysis for the Global Burden of Disease Study 2019 [published correction appears in *Lancet*. 2020 Nov 14;396(10262):1562]. *Lancet*. 2020;396(10258):1204-1222. doi:10.1016/S0140-6736(20)30925-9

Figure 1 Process steps of medicines mapping to the Disability Adjusted Life Years with an illustrative example

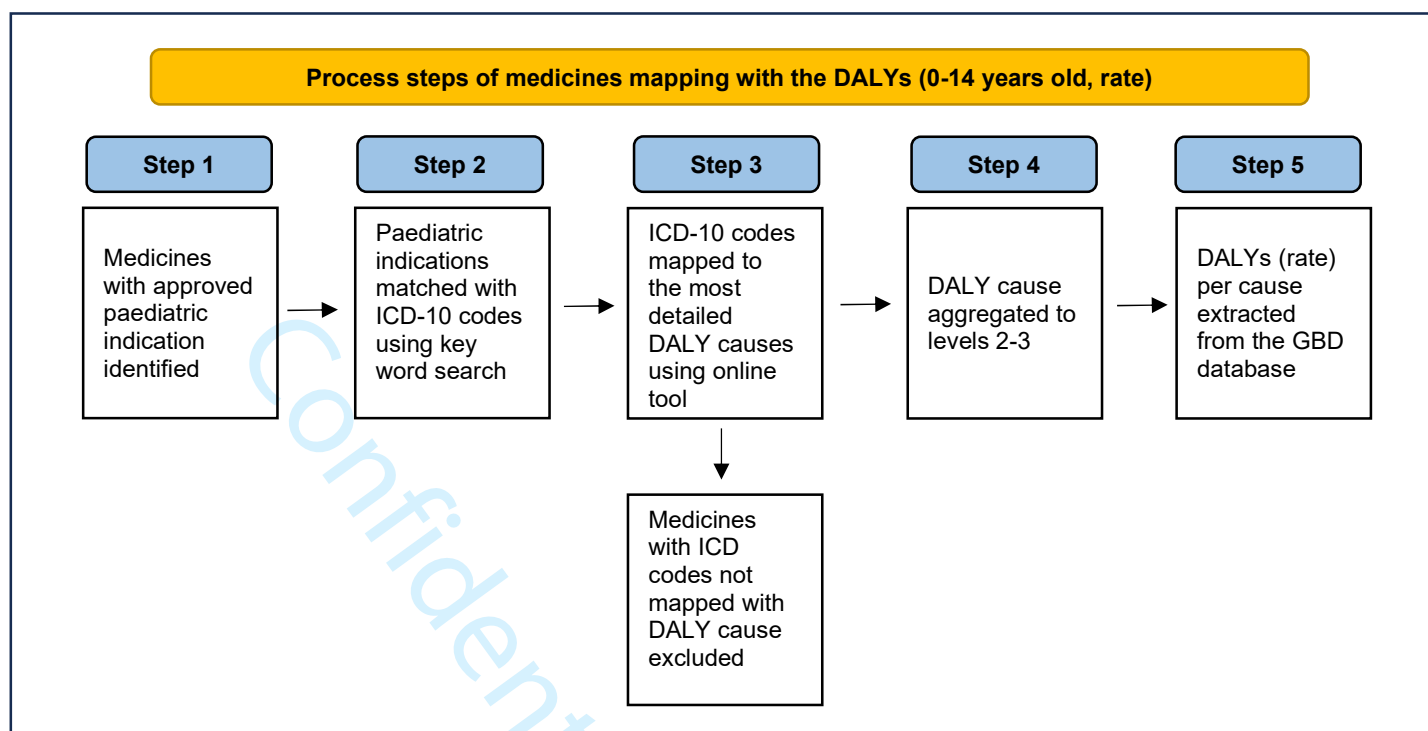

**Illustrative example**

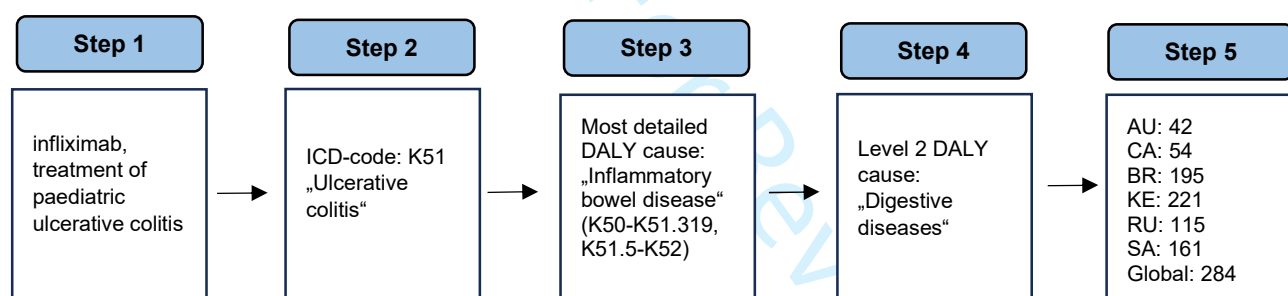

AU- Australia; CA- Canada; BR – Brazil; KE – Kenya; RU – Russia; SA – South Africa



Volodina et al., Public health relevance of medicines developed under paediatric legislation in Europe and the United States: a systematic mapping study

Supplement 1: All Disability Adjusted Life Years causes with mapped sampled medicines

|                                         | DALYs (0-14 years old, both sexes, rate), 2019 |        |        |       |        |              |        | Sampled medicines, N |
|-----------------------------------------|------------------------------------------------|--------|--------|-------|--------|--------------|--------|----------------------|
|                                         | Australia                                      | Brazil | Canada | Kenya | Russia | South Africa | Global |                      |
| Acne vulgaris                           | 67                                             | 51     | 53     | 78    | 38     | 73           | 65     | 2                    |
| Acute glomerulonephritis                | 0                                              | 2      | 0      | 2     | 1      | 2            | 3      | 0                    |
| Acute hepatitis A                       | 2                                              | 6      | 2      | 26    | 5      | 8            | 59     | 0                    |
| Acute hepatitis B                       | 0                                              | 3      | 0      | 5     | 4      | 1            | 22     | 6                    |
| Acute hepatitis C                       | 0                                              | 1      | 0      | 2     | 0      | 0            | 4      | 1                    |
| Acute hepatitis E                       | 0                                              | 1      | 0      | 1     | 0      | 1            | 3      | 0                    |
| Acute lymphoid leukemia                 | 29                                             | 92     | 26     | 41    | 57     | 16           | 66     | 3                    |
| Acute myeloid leukemia                  | 20                                             | 46     | 20     | 20    | 18     | 6            | 30     | 0                    |
| Adverse effects of medical treatment    | 21                                             | 40     | 17     | 51    | 25     | 46           | 61     | 8                    |
| African trypanosomiasis                 | 0                                              | 0      | 0      | 0     | 0      | 0            | 2      | 0                    |
| Age-related and other hearing loss      | 38                                             | 71     | 28     | 161   | 78     | 161          | 106    | 0                    |
| Age-related macular degeneration        | 0                                              | 0      | 0      | 0     | 0      | 0            | 0      | 0                    |
| Alcohol use disorders                   | 4                                              | 3      | 6      | 2     | 3      | 2            | 2      | 0                    |
| Alcoholic cardiomyopathy                | 0                                              | 0      | 0      | 0     | 0      | 0            | 0      | 0                    |
| Alopecia areata                         | 3                                              | 3      | 4      | 2     | 3      | 2            | 3      | 0                    |
| Alzheimer's disease and other dementias | 0                                              | 0      | 0      | 0     | 0      | 0            | 0      | 0                    |
| Amphetamine use disorders               | 0                                              | 0      | 0      | 0     | 0      | 0            | 0      | 0                    |
| Anorexia nervosa                        | 13                                             | 6      | 8      | 3     | 4      | 4            | 4      | 0                    |
| Anxiety disorders                       | 249                                            | 231    | 131    | 115   | 128    | 149          | 157    | 0                    |
| Aortic aneurysm                         | 0                                              | 0      | 0      | 0     | 0      | 0            | 0      | 0                    |
| Appendicitis                            | 3                                              | 15     | 2      | 15    | 5      | 11           | 16     | 2                    |

## Volodina et al., Public health relevance of medicines developed under paediatric legislation in Europe and the United States: a systematic mapping study

|                                                            |     |     |     |     |     |     |     |   |
|------------------------------------------------------------|-----|-----|-----|-----|-----|-----|-----|---|
| Asbestosis                                                 | 0   | 0   | 0   | 0   | 0   | 0   | 0   | 0 |
| Ascariasis                                                 | 0   | 4   | 0   | 8   | 0   | 1   | 22  | 0 |
| Asthma                                                     | 455 | 416 | 301 | 212 | 148 | 274 | 210 | 5 |
| Atopic dermatitis                                          | 250 | 208 | 183 | 80  | 396 | 96  | 160 | 1 |
| Atrial fibrillation and flutter                            | 0   | 0   | 0   | 0   | 0   | 0   | 0   | 0 |
| Attention-deficit/hyperactivity disorder                   | 65  | 37  | 42  | 12  | 21  | 11  | 21  | 1 |
| Autism spectrum disorders                                  | 80  | 66  | 112 | 71  | 75  | 70  | 66  | 0 |
| Benign and in situ cervical and uterine neoplasms          | 0   | 0   | 0   | 0   | 0   | 0   | 0   | 0 |
| Benign and in situ intestinal neoplasms                    | 0   | 0   | 0   | 0   | 0   | 0   | 0   | 0 |
| Benign prostatic hyperplasia                               | 0   | 0   | 0   | 0   | 0   | 0   | 0   | 0 |
| Bipolar disorder                                           | 37  | 34  | 31  | 13  | 10  | 12  | 12  | 3 |
| Bladder cancer                                             | 0   | 0   | 0   | 0   | 0   | 0   | 0   | 0 |
| Brain and central nervous system cancer                    | 70  | 139 | 75  | 54  | 93  | 35  | 85  | 0 |
| Breast cancer                                              | 0   | 0   | 0   | 0   | 0   | 0   | 0   | 0 |
| Bulimia nervosa                                            | 18  | 4   | 10  | 3   | 4   | 4   | 4   | 0 |
| Cannabis use disorders                                     | 3   | 1   | 6   | 0   | 1   | 0   | 1   | 0 |
| Caries of deciduous teeth                                  | 9   | 11  | 9   | 11  | 12  | 10  | 10  | 0 |
| Caries of permanent teeth                                  | 10  | 12  | 11  | 10  | 14  | 11  | 13  | 0 |
| Cataract                                                   | 0   | 0   | 0   | 0   | 0   | 0   | 0   | 0 |
| Cellulitis                                                 | 3   | 9   | 4   | 3   | 3   | 3   | 3   | 0 |
| Cervical cancer                                            | 0   | 0   | 0   | 0   | 0   | 0   | 0   | 0 |
| Chagas disease                                             | 0   | 1   | 0   | 0   | 0   | 0   | 0   | 0 |
| Chlamydial infection                                       | 0   | 0   | 0   | 0   | 0   | 0   | 0   | 0 |
| Chronic kidney disease due to diabetes mellitus type 1     | 0   | 1   | 0   | 1   | 1   | 2   | 2   | 0 |
| Chronic kidney disease due to diabetes mellitus type 2     | 0   | 0   | 0   | 0   | 0   | 0   | 0   | 0 |
| Chronic kidney disease due to glomerulonephritis           | 4   | 24  | 8   | 25  | 19  | 25  | 32  | 0 |
| Chronic kidney disease due to hypertension                 | 0   | 0   | 0   | 0   | 0   | 0   | 0   | 0 |
| Chronic kidney disease due to other and unspecified causes | 8   | 41  | 16  | 31  | 30  | 46  | 59  | 0 |

Volodina et al., Public health relevance of medicines developed under paediatric legislation in Europe and the United States: a systematic mapping study

|                                                                |     |      |     |      |     |      |      |   |
|----------------------------------------------------------------|-----|------|-----|------|-----|------|------|---|
| Chronic lymphoid leukemia                                      | 0   | 0    | 0   | 0    | 0   | 0    | 0    | 0 |
| Chronic myeloid leukemia                                       | 1   | 1    | 1   | 7    | 1   | 1    | 8    | 3 |
| Chronic obstructive pulmonary disease                          | 9   | 12   | 8   | 26   | 11  | 25   | 22   | 0 |
| Cirrhosis and other chronic liver diseases due to alcohol use  | 0   | 0    | 0   | 0    | 0   | 0    | 0    | 0 |
| Cirrhosis and other chronic liver diseases due to hepatitis B  | 0   | 0    | 0   | 1    | 0   | 0    | 1    | 0 |
| Cirrhosis and other chronic liver diseases due to hepatitis C  | 0   | 1    | 0   | 1    | 0   | 0    | 2    | 0 |
| Cirrhosis and other chronic liver diseases due to NAFLD        | 0   | 0    | 0   | 0    | 0   | 0    | 0    | 0 |
| Cirrhosis and other chronic liver diseases due to other causes | 2   | 22   | 4   | 47   | 11  | 22   | 71   | 0 |
| Coal workers pneumoconiosis                                    | 0   | 0    | 0   | 0    | 0   | 0    | 0    | 0 |
| Cocaine use disorders                                          | 1   | 1    | 1   | 0    | 0   | 0    | 0    | 0 |
| Colon and rectum cancer                                        | 1   | 2    | 1   | 1    | 1   | 2    | 2    | 0 |
| Conduct disorder                                               | 193 | 181  | 157 | 194  | 187 | 193  | 172  | 0 |
| Congenital heart anomalies                                     | 172 | 1185 | 197 | 546  | 369 | 415  | 866  | 0 |
| Congenital musculoskeletal and limb anomalies                  | 90  | 103  | 75  | 106  | 83  | 144  | 107  | 0 |
| Contact dermatitis                                             | 2   | 4    | 16  | 4    | 16  | 4    | 5    | 0 |
| Cutaneous and mucocutaneous leishmaniasis                      | 0   | 1    | 0   | 0    | 0   | 0    | 2    | 0 |
| Cystic echinococcosis                                          | 0   | 0    | 0   | 2    | 1   | 0    | 1    | 0 |
| Cysticercosis                                                  | 0   | 1    | 0   | 1    | 0   | 1    | 0    | 0 |
| Decubitus ulcer                                                | 0   | 1    | 0   | 0    | 0   | 0    | 0    | 0 |
| Dengue                                                         | 2   | 20   | 0   | 4    | 0   | 0    | 54   | 0 |
| Diabetes mellitus type 1                                       | 12  | 24   | 15  | 20   | 11  | 19   | 26   | 5 |
| Diabetes mellitus type 2                                       | 0   | 0    | 0   | 0    | 0   | 0    | 0    | 5 |
| Diarrheal diseases                                             | 76  | 561  | 138 | 4147 | 226 | 2431 | 2636 | 2 |
| Dietary iron deficiency                                        | 104 | 368  | 39  | 395  | 91  | 323  | 695  | 0 |
| Digestive congenital anomalies                                 | 59  | 372  | 63  | 155  | 118 | 115  | 215  | 0 |
| Diphtheria                                                     | 0   | 0    | 0   | 4    | 0   | 4    | 18   | 4 |
| Down syndrome                                                  | 45  | 164  | 46  | 44   | 35  | 102  | 72   | 0 |
| Drug-susceptible tuberculosis                                  | 1   | 25   | 1   | 213  | 9   | 587  | 285  | 0 |

## Volodina et al., Public health relevance of medicines developed under paediatric legislation in Europe and the United States: a systematic mapping study

|                                                   |     |     |     |      |     |      |     |    |
|---------------------------------------------------|-----|-----|-----|------|-----|------|-----|----|
| Dysthymia                                         | 11  | 7   | 12  | 11   | 7   | 9    | 9   | 0  |
| Ebola                                             | 0   | 0   | 0   | 0    | 0   | 0    | 2   | 0  |
| Edentulism                                        | 0   | 0   | 0   | 0    | 0   | 0    | 0   | 0  |
| Encephalitis                                      | 9   | 28  | 9   | 19   | 60  | 15   | 121 | 1  |
| Endocarditis                                      | 1   | 15  | 1   | 5    | 3   | 5    | 10  | 0  |
| Endocrine, metabolic, blood, and immune disorders | 167 | 161 | 134 | 79   | 154 | 186  | 159 | 29 |
| Endometriosis                                     | 0   | 0   | 0   | 0    | 0   | 0    | 0   | 0  |
| Esophageal cancer                                 | 0   | 0   | 0   | 0    | 0   | 0    | 0   | 0  |
| Extensively drug-resistant tuberculosis           | 0   | 0   | 0   | 0    | 2   | 0    | 1   | 0  |
| Female infertility                                | 0   | 0   | 0   | 0    | 0   | 0    | 0   | 0  |
| Food-borne trematodiasis                          | 0   | 0   | 0   | 0    | 1   | 0    | 1   | 0  |
| Fungal skin diseases                              | 20  | 26  | 7   | 64   | 15  | 36   | 45  | 2  |
| G6PD deficiency                                   | 0   | 12  | 2   | 1    | 1   | 7    | 5   | 0  |
| G6PD trait                                        | 0   | 0   | 0   | 0    | 0   | 0    | 0   | 0  |
| Gallbladder and biliary diseases                  | 3   | 9   | 4   | 5    | 7   | 5    | 9   | 0  |
| Gallbladder and biliary tract cancer              | 0   | 0   | 0   | 0    | 0   | 0    | 0   | 0  |
| Gastritis and duodenitis                          | 3   | 5   | 2   | 6    | 6   | 10   | 10  | 0  |
| Gastroesophageal reflux disease                   | 1   | 2   | 1   | 1    | 1   | 1    | 1   | 3  |
| Genital herpes                                    | 0   | 0   | 0   | 0    | 0   | 0    | 0   | 0  |
| Genital prolapse                                  | 0   | 0   | 0   | 0    | 0   | 0    | 0   | 0  |
| Glaucoma                                          | 0   | 0   | 0   | 0    | 0   | 0    | 0   | 0  |
| Gonococcal infection                              | 0   | 0   | 0   | 0    | 0   | 0    | 0   | 0  |
| Gout                                              | 0   | 0   | 0   | 0    | 0   | 0    | 0   | 0  |
| Guinea worm disease                               | 0   | 0   | 0   | 0    | 0   | 0    | 0   | 0  |
| Hemolytic disease and other neonatal jaundice     | 3   | 52  | 3   | 113  | 33  | 113  | 252 | 0  |
| HIV/AIDS                                          | 2   | 79  | 4   | 1875 | 150 | 3072 | 338 | 15 |
| Hodgkin lymphoma                                  | 1   | 3   | 1   | 6    | 3   | 2    | 7   | 0  |
| Hookworm disease                                  | 0   | 4   | 0   | 19   | 0   | 16   | 19  | 0  |

## Volodina et al., Public health relevance of medicines developed under paediatric legislation in Europe and the United States: a systematic mapping study

|                                                     |     |     |     |      |     |      |      |    |
|-----------------------------------------------------|-----|-----|-----|------|-----|------|------|----|
| Hypertensive heart disease                          | 0   | 0   | 0   | 0    | 0   | 0    | 0    | 7  |
| Idiopathic developmental intellectual disability    | 16  | 20  | 27  | 41   | 25  | 20   | 81   | 0  |
| Idiopathic epilepsy                                 | 89  | 167 | 64  | 207  | 84  | 183  | 180  | 10 |
| Inflammatory bowel disease                          | 3   | 3   | 7   | 4    | 2   | 5    | 4    | 4  |
| Inguinal, femoral, and abdominal hernia             | 9   | 31  | 9   | 33   | 46  | 53   | 36   | 0  |
| Interstitial lung disease and pulmonary sarcoidosis | 2   | 4   | 4   | 2    | 2   | 3    | 3    | 0  |
| Intracerebral hemorrhage                            | 3   | 12  | 4   | 22   | 6   | 14   | 46   | 0  |
| Invasive Non-typhoidal Salmonella (iNTS)            | 0   | 3   | 0   | 712  | 1   | 113  | 276  | 0  |
| Iodine deficiency                                   | 1   | 0   | 1   | 3    | 2   | 2    | 12   | 0  |
| Ischemic heart disease                              | 0   | 0   | 0   | 0    | 0   | 0    | 0    | 0  |
| Ischemic stroke                                     | 8   | 9   | 12  | 25   | 14  | 23   | 22   | 0  |
| Kidney cancer                                       | 8   | 22  | 7   | 4    | 13  | 10   | 12   | 0  |
| Klinefelter syndrome                                | 0   | 0   | 0   | 0    | 0   | 0    | 0    | 0  |
| Larynx cancer                                       | 0   | 0   | 0   | 0    | 0   | 0    | 0    | 0  |
| Latent tuberculosis infection                       | 0   | 0   | 0   | 0    | 0   | 0    | 0    | 0  |
| Leprosy                                             | 0   | 0   | 0   | 0    | 0   | 0    | 0    | 0  |
| Lip and oral cavity cancer                          | 1   | 1   | 1   | 1    | 1   | 1    | 1    | 0  |
| Liver cancer due to alcohol use                     | 0   | 0   | 0   | 0    | 0   | 0    | 0    | 0  |
| Liver cancer due to hepatitis B                     | 0   | 0   | 0   | 1    | 1   | 0    | 1    | 0  |
| Liver cancer due to hepatitis C                     | 0   | 0   | 0   | 0    | 0   | 0    | 0    | 0  |
| Liver cancer due to NASH                            | 0   | 0   | 0   | 0    | 0   | 0    | 0    | 0  |
| Liver cancer due to other causes                    | 6   | 7   | 7   | 5    | 13  | 4    | 13   | 0  |
| Low back pain                                       | 109 | 137 | 133 | 71   | 148 | 65   | 100  | 0  |
| Lower respiratory infections                        | 62  | 997 | 57  | 3119 | 397 | 2527 | 3196 | 14 |
| Lymphatic filariasis                                | 0   | 3   | 0   | 24   | 0   | 0    | 14   | 0  |
| Major depressive disorder                           | 135 | 178 | 91  | 47   | 28  | 42   | 57   | 1  |
| Malaria                                             | 0   | 7   | 0   | 2450 | 0   | 40   | 1820 | 2  |
| Male infertility                                    | 0   | 0   | 0   | 0    | 0   | 0    | 0    | 0  |

## Volodina et al., Public health relevance of medicines developed under paediatric legislation in Europe and the United States: a systematic mapping study

|                                                                        |     |      |     |      |     |      |      |   |
|------------------------------------------------------------------------|-----|------|-----|------|-----|------|------|---|
| Malignant skin melanoma                                                | 5   | 2    | 2   | 1    | 2   | 1    | 1    | 1 |
| Maternal disorders                                                     | 0   | 3    | 0   | 5    | 0   | 0    | 4    | 0 |
| Measles                                                                | 0   | 0    | 0   | 196  | 0   | 281  | 349  | 0 |
| Meningitis                                                             | 24  | 146  | 24  | 600  | 59  | 261  | 604  | 7 |
| Mesothelioma                                                           | 0   | 0    | 0   | 0    | 0   | 0    | 0    | 0 |
| Migraine                                                               | 132 | 417  | 176 | 89   | 133 | 127  | 165  | 3 |
| Motor neuron disease                                                   | 25  | 7    | 13  | 1    | 4   | 1    | 4    | 0 |
| Multidrug-resistant tuberculosis without extensive drug resistance     | 0   | 1    | 0   | 7    | 4   | 33   | 25   | 0 |
| Multiple myeloma                                                       | 0   | 0    | 0   | 0    | 0   | 0    | 0    | 0 |
| Multiple sclerosis                                                     | 0   | 0    | 1   | 0    | 0   | 0    | 0    | 1 |
| Myelodysplastic, myeloproliferative, and other hematopoietic neoplasms | 1   | 5    | 4   | 1    | 2   | 1    | 2    | 0 |
| Myocarditis                                                            | 8   | 17   | 8   | 5    | 7   | 4    | 12   | 0 |
| Nasopharynx cancer                                                     | 1   | 1    | 1   | 2    | 1   | 1    | 2    | 0 |
| Near vision loss                                                       | 0   | 0    | 0   | 0    | 0   | 1    | 0    | 0 |
| Neck pain                                                              | 10  | 8    | 18  | 7    | 8   | 7    | 13   | 0 |
| Neonatal encephalopathy due to birth asphyxia and trauma               | 346 | 1313 | 327 | 3220 | 355 | 2341 | 2625 | 0 |
| Neonatal preterm birth                                                 | 513 | 2240 | 791 | 2250 | 482 | 4103 | 3182 | 0 |
| Neonatal sepsis and other neonatal infections                          | 33  | 1077 | 68  | 1621 | 288 | 1157 | 1093 | 2 |
| Neural tube defects                                                    | 79  | 324  | 60  | 258  | 76  | 146  | 383  | 0 |
| Non-Hodgkin lymphoma                                                   | 9   | 26   | 11  | 27   | 17  | 15   | 25   | 0 |
| Non-melanoma skin cancer (basal-cell carcinoma)                        | 0   | 0    | 0   | 0    | 0   | 0    | 0    | 0 |
| Non-melanoma skin cancer (squamous-cell carcinoma)                     | 0   | 0    | 0   | 0    | 0   | 0    | 0    | 0 |
| Non-rheumatic calcific aortic valve disease                            | 0   | 0    | 0   | 0    | 0   | 0    | 0    | 0 |
| Non-rheumatic degenerative mitral valve disease                        | 0   | 0    | 0   | 0    | 0   | 0    | 0    | 0 |
| Onchocerciasis                                                         | 0   | 0    | 0   | 0    | 0   | 0    | 11   | 0 |
| Opioid use disorders                                                   | 0   | 0    | 0   | 0    | 0   | 0    | 0    | 0 |
| Orofacial clefts                                                       | 3   | 9    | 1   | 14   | 3   | 17   | 17   | 0 |

Volodina et al., Public health relevance of medicines developed under paediatric legislation in Europe and the United States: a systematic mapping study

|                                                |     |      |     |      |     |      |      |    |
|------------------------------------------------|-----|------|-----|------|-----|------|------|----|
| Osteoarthritis hand                            | 0   | 0    | 0   | 0    | 0   | 0    | 0    | 0  |
| Osteoarthritis hip                             | 0   | 0    | 0   | 0    | 0   | 0    | 0    | 0  |
| Osteoarthritis knee                            | 0   | 0    | 0   | 0    | 0   | 0    | 0    | 0  |
| Osteoarthritis other                           | 0   | 0    | 0   | 0    | 0   | 0    | 0    | 0  |
| Other benign and in situ neoplasms             | 0   | 0    | 0   | 0    | 0   | 0    | 0    | 2  |
| Other cardiomyopathy                           | 8   | 74   | 14  | 47   | 25  | 49   | 32   | 0  |
| Other cardiovascular and circulatory diseases  | 13  | 45   | 14  | 41   | 13  | 29   | 58   | 0  |
| Other chromosomal abnormalities                | 112 | 178  | 166 | 59   | 78  | 127  | 95   | 0  |
| Other chronic respiratory diseases             | 13  | 30   | 14  | 34   | 13  | 38   | 32   | 8  |
| Other congenital birth defects                 | 132 | 659  | 170 | 519  | 320 | 561  | 589  | 2  |
| Other digestive diseases                       | 3   | 11   | 4   | 16   | 9   | 11   | 16   | 1  |
| Other drug use disorders                       | 0   | 0    | 1   | 0    | 0   | 0    | 0    | 0  |
| Other gynecological diseases                   | 0   | 1    | 0   | 1    | 0   | 1    | 1    | 1  |
| Other hemoglobinopathies and hemolytic anemias | 4   | 17   | 2   | 15   | 4   | 13   | 26   | 3  |
| Other intestinal infectious diseases           | 0   | 2    | 0   | 4    | 1   | 3    | 5    | 4  |
| Other leukemia                                 | 3   | 20   | 11  | 38   | 5   | 25   | 43   | 0  |
| Other malignant neoplasms                      | 56  | 108  | 76  | 82   | 73  | 48   | 120  | 1  |
| Other mental disorders                         | 3   | 1    | 3   | 1    | 1   | 1    | 2    | 1  |
| Other musculoskeletal disorders                | 7   | 15   | 65  | 2    | 3   | 2    | 10   | 1  |
| Other neglected tropical diseases              | 10  | 53   | 4   | 42   | 14  | 33   | 101  | 0  |
| Other neonatal disorders                       | 245 | 1226 | 354 | 1797 | 299 | 2955 | 1731 | 0  |
| Other neurological disorders                   | 57  | 76   | 59  | 75   | 75  | 68   | 71   | 1  |
| Other non-rheumatic valve diseases             | 0   | 0    | 0   | 0    | 0   | 0    | 0    | 0  |
| Other nutritional deficiencies                 | 2   | 10   | 3   | 9    | 6   | 6    | 31   | 0  |
| Other oral disorders                           | 31  | 32   | 31  | 32   | 32  | 32   | 31   | 1  |
| Other pharynx cancer                           | 0   | 0    | 0   | 0    | 0   | 0    | 0    | 0  |
| Other pneumoconiosis                           | 0   | 0    | 0   | 0    | 0   | 0    | 0    | 0  |
| Other sense organ diseases                     | 15  | 15   | 13  | 15   | 13  | 15   | 14   | 10 |

## Volodina et al., Public health relevance of medicines developed under paediatric legislation in Europe and the United States: a systematic mapping study

|                                            |    |     |    |      |    |     |     |   |
|--------------------------------------------|----|-----|----|------|----|-----|-----|---|
| Other sexually transmitted infections      | 0  | 0   | 0  | 0    | 0  | 0   | 0   | 2 |
| Other skin and subcutaneous diseases       | 23 | 24  | 23 | 20   | 22 | 22  | 23  | 1 |
| Other unspecified infectious diseases      | 37 | 70  | 26 | 104  | 93 | 290 | 138 | 6 |
| Other urinary diseases                     | 3  | 4   | 3  | 17   | 4  | 7   | 11  | 1 |
| Other vision loss                          | 5  | 8   | 4  | 4    | 4  | 3   | 5   | 2 |
| Otitis media                               | 26 | 49  | 26 | 57   | 46 | 55  | 51  | 2 |
| Ovarian cancer                             | 1  | 2   | 1  | 1    | 2  | 2   | 2   | 0 |
| Pancreatic cancer                          | 0  | 0   | 0  | 0    | 0  | 0   | 0   | 0 |
| Pancreatitis                               | 1  | 2   | 1  | 1    | 2  | 0   | 2   | 0 |
| Paralytic ileus and intestinal obstruction | 13 | 91  | 16 | 84   | 21 | 39  | 103 | 0 |
| Paratyphoid fever                          | 0  | 0   | 0  | 16   | 0  | 0   | 50  | 0 |
| Parkinson's disease                        | 0  | 0   | 0  | 0    | 0  | 0   | 0   | 0 |
| Peptic ulcer disease                       | 0  | 2   | 1  | 5    | 2  | 2   | 10  | 0 |
| Periodontal diseases                       | 0  | 0   | 0  | 0    | 0  | 0   | 0   | 0 |
| Peripheral artery disease                  | 0  | 0   | 0  | 0    | 0  | 0   | 0   | 0 |
| Polycystic ovarian syndrome                | 2  | 0   | 1  | 0    | 0  | 0   | 1   | 0 |
| Premenstrual syndrome                      | 20 | 23  | 22 | 24   | 21 | 21  | 21  | 0 |
| Prostate cancer                            | 0  | 0   | 0  | 0    | 0  | 0   | 0   | 0 |
| Protein-energy malnutrition                | 10 | 194 | 10 | 1188 | 36 | 802 | 555 | 1 |
| Pruritus                                   | 4  | 5   | 5  | 8    | 5  | 7   | 5   | 0 |
| Psoriasis                                  | 52 | 32  | 41 | 6    | 13 | 9   | 15  | 2 |
| Pyoderma                                   | 6  | 24  | 2  | 23   | 5  | 15  | 21  | 4 |
| Rabies                                     | 0  | 0   | 0  | 15   | 0  | 3   | 21  | 0 |
| Refraction disorders                       | 46 | 54  | 27 | 17   | 39 | 18  | 31  | 0 |
| Rheumatic heart disease                    | 2  | 28  | 1  | 38   | 2  | 32  | 36  | 0 |
| Rheumatoid arthritis                       | 1  | 2   | 2  | 1    | 1  | 1   | 1   | 7 |
| Scabies                                    | 6  | 162 | 5  | 54   | 13 | 31  | 76  | 0 |
| Schistosomiasis                            | 0  | 10  | 0  | 68   | 0  | 37  | 14  | 0 |



## Volodina et al., Public health relevance of medicines developed under paediatric legislation in Europe and the United States: a systematic mapping study

|                                                     |     |      |     |     |      |      |      |   |
|-----------------------------------------------------|-----|------|-----|-----|------|------|------|---|
| Schizophrenia                                       | 2   | 2    | 1   | 2   | 2    | 2    | 2    | 5 |
| Seborrhoeic dermatitis                              | 2   | 2    | 2   | 3   | 1    | 3    | 3    | 0 |
| Self-harm and interpersonal violence                | 70  | 279  | 90  | 133 | 171  | 321  | 240  | 1 |
| Sickle cell disorders                               | 0   | 31   | 1   | 82  | 0    | 3    | 122  | 0 |
| Sickle cell trait                                   | 1   | 6    | 0   | 86  | 0    | 2    | 43   | 0 |
| Silicosis                                           | 0   | 0    | 0   | 0   | 0    | 0    | 0    | 0 |
| Stomach cancer                                      | 0   | 0    | 0   | 0   | 0    | 0    | 0    | 0 |
| Subarachnoid hemorrhage                             | 3   | 21   | 5   | 4   | 6    | 3    | 18   | 0 |
| Sudden infant death syndrome                        | 102 | 45   | 68  | 87  | 102  | 135  | 125  | 0 |
| Syphilis                                            | 0   | 37   | 0   | 419 | 2    | 1321 | 371  | 0 |
| Tension-type headache                               | 13  | 18   | 17  | 11  | 17   | 12   | 13   | 0 |
| Testicular cancer                                   | 4   | 3    | 4   | 1   | 3    | 3    | 3    | 0 |
| Tetanus                                             | 0   | 2    | 0   | 384 | 0    | 3    | 89   | 4 |
| Thalasseмии                                         | 4   | 6    | 2   | 0   | 9    | 5    | 28   | 0 |
| Thalasseмии trait                                   | 3   | 7    | 0   | 5   | 8    | 5    | 56   | 0 |
| Thyroid cancer                                      | 1   | 1    | 1   | 1   | 1    | 1    | 1    | 1 |
| Tracheal, bronchus, and lung cancer                 | 1   | 1    | 1   | 0   | 0    | 0    | 1    | 0 |
| Trachoma                                            | 0   | 0    | 0   | 0   | 0    | 0    | 0    | 0 |
| Transport and other unintentional injuries          | 683 | 1168 | 435 | 825 | 1085 | 1432 | 1482 | 0 |
| Trichomoniasis                                      | 0   | 0    | 0   | 0   | 0    | 0    | 0    | 0 |
| Trichuriasis                                        | 0   | 4    | 0   | 3   | 0    | 4    | 4    | 0 |
| Turner syndrome                                     | 0   | 0    | 0   | 0   | 0    | 0    | 0    | 0 |
| Typhoid fever                                       | 0   | 0    | 0   | 359 | 0    | 3    | 275  | 0 |
| Upper respiratory infections                        | 132 | 154  | 144 | 154 | 100  | 106  | 114  | 0 |
| Urinary tract infections and interstitial nephritis | 5   | 48   | 5   | 7   | 10   | 4    | 23   | 0 |
| Urogenital congenital anomalies                     | 28  | 84   | 29  | 33  | 25   | 26   | 50   | 0 |
| Urolithiasis                                        | 0   | 0    | 0   | 0   | 1    | 0    | 0    | 0 |
| Urticaria                                           | 71  | 80   | 88  | 80  | 133  | 81   | 80   | 2 |

Volodina et al., Public health relevance of medicines developed under paediatric legislation in Europe and the United States: a systematic mapping study

|                               |     |     |     |     |     |     |     |   |
|-------------------------------|-----|-----|-----|-----|-----|-----|-----|---|
| Uterine cancer                | 0   | 0   | 0   | 0   | 0   | 0   | 0   | 0 |
| Uterine fibroids              | 0   | 0   | 0   | 0   | 1   | 0   | 0   | 0 |
| Varicella and herpes zoster   | 4   | 27  | 3   | 36  | 8   | 19  | 30  | 1 |
| Vascular intestinal disorders | 1   | 2   | 1   | 1   | 2   | 1   | 2   | 0 |
| Viral skin diseases           | 204 | 105 | 326 | 175 | 104 | 121 | 122 | 0 |
| Visceral leishmaniasis        | 0   | 70  | 0   | 49  | 0   | 0   | 14  | 0 |
| Vitamin A deficiency          | 0   | 29  | 1   | 110 | 0   | 22  | 51  | 0 |
| Whooping cough                | 4   | 17  | 7   | 478 | 1   | 593 | 515 | 4 |
| Yellow fever                  | 0   | 0   | 0   | 6   | 0   | 0   | 8   | 0 |
| Zika virus                    | 0   | 0   | 0   | 0   | 0   | 0   | 0   | 0 |

For Review Only

Volodina et al., Public health relevance of medicines developed under paediatric legislation in Europe and the United States: a systematic mapping study

**Supplement 2. Paediatric indications not mapped with Disability Adjusted Life Year cause**

| N | Approved indication in EU/US                                                                                                                                                                  | Assigned ICD 10 classification                                                 |
|---|-----------------------------------------------------------------------------------------------------------------------------------------------------------------------------------------------|--------------------------------------------------------------------------------|
| 1 | Maintenance of anesthesia in non-intubated patients                                                                                                                                           | Z00-Z13 Persons encountering health services for examination and investigation |
| 2 | Adjunct to general anesthesia                                                                                                                                                                 |                                                                                |
| 3 | Contrast agent for intravenous use with magnetic resonance imaging                                                                                                                            |                                                                                |
| 4 | Diagnostic evaluation of tissue pathologies with contrast-enhanced magnetic resonance imaging                                                                                                 |                                                                                |
| 5 | Emergency contraception within 120 hours (5 days) of unprotected sexual intercourse or contraceptive failure                                                                                  | Z30 Contraceptive management                                                   |
| 6 | Oral contraception                                                                                                                                                                            |                                                                                |
| 7 | Management of mild to moderate pain and the management of moderate to severe pain as an adjunct to opioid analgesics, and for the reduction of fever in pediatric patients 6 months and older | R52 Pain, not elsewhere classified                                             |
| 8 | Management of pain severe enough to require daily, around the-clock, long-term opioid treatment in pediatric patients 11 years and older                                                      |                                                                                |
