# Supplementary material for: Public health relevance of medicines developed under paediatric legislation in Europe and the USA: a systematic mapping study
Source: PubMed Central journal article supplement — BMJ Paediatr Open. 2024 Apr 2;8(1):e002455. doi: 10.1136/bmjpo-2023-002455 (PMC10989171; doi:10.1136/bmjpo-2023-002455), 2024-04-02
Supplement: bmjpo-2023-002455supp001.pdf [file bmjpo-2023-002455supp001.pdf]

Volodina et al., Public health relevance of medicines developed under paediatric legislation in Europe and the United States: a systematic mapping study

**Supplement 1: All Disability Adjusted Life Years causes with mapped sampled medicines**

|                                         | DALYs (0-14 years old, both sexes, rate), 2019 |        |        |       |        |              |        | Sampled medicines, N |
|-----------------------------------------|------------------------------------------------|--------|--------|-------|--------|--------------|--------|----------------------|
|                                         | Australia                                      | Brazil | Canada | Kenya | Russia | South Africa | Global |                      |
| Acne vulgaris                           | 67                                             | 51     | 53     | 78    | 38     | 73           | 65     | 2                    |
| Acute glomerulonephritis                | 0                                              | 2      | 0      | 2     | 1      | 2            | 3      | 0                    |
| Acute hepatitis A                       | 2                                              | 6      | 2      | 26    | 5      | 8            | 59     | 0                    |
| Acute hepatitis B                       | 0                                              | 3      | 0      | 5     | 4      | 1            | 22     | 6                    |
| Acute hepatitis C                       | 0                                              | 1      | 0      | 2     | 0      | 0            | 4      | 1                    |
| Acute hepatitis E                       | 0                                              | 1      | 0      | 1     | 0      | 1            | 3      | 0                    |
| Acute lymphoid leukemia                 | 29                                             | 92     | 26     | 41    | 57     | 16           | 66     | 3                    |
| Acute myeloid leukemia                  | 20                                             | 46     | 20     | 20    | 18     | 6            | 30     | 0                    |
| Adverse effects of medical treatment    | 21                                             | 40     | 17     | 51    | 25     | 46           | 61     | 8                    |
| African trypanosomiasis                 | 0                                              | 0      | 0      | 0     | 0      | 0            | 2      | 0                    |
| Age-related and other hearing loss      | 38                                             | 71     | 28     | 161   | 78     | 161          | 106    | 0                    |
| Age-related macular degeneration        | 0                                              | 0      | 0      | 0     | 0      | 0            | 0      | 0                    |
| Alcohol use disorders                   | 4                                              | 3      | 6      | 2     | 3      | 2            | 2      | 0                    |
| Alcoholic cardiomyopathy                | 0                                              | 0      | 0      | 0     | 0      | 0            | 0      | 0                    |
| Alopecia areata                         | 3                                              | 3      | 4      | 2     | 3      | 2            | 3      | 0                    |
| Alzheimer's disease and other dementias | 0                                              | 0      | 0      | 0     | 0      | 0            | 0      | 0                    |
| Amphetamine use disorders               | 0                                              | 0      | 0      | 0     | 0      | 0            | 0      | 0                    |
| Anorexia nervosa                        | 13                                             | 6      | 8      | 3     | 4      | 4            | 4      | 0                    |
| Anxiety disorders                       | 249                                            | 231    | 131    | 115   | 128    | 149          | 157    | 0                    |
| Aortic aneurysm                         | 0                                              | 0      | 0      | 0     | 0      | 0            | 0      | 0                    |
| Appendicitis                            | 3                                              | 15     | 2      | 15    | 5      | 11           | 16     | 2                    |

## Volodina et al., Public health relevance of medicines developed under paediatric legislation in Europe and the United States: a systematic mapping study

|                                                            |     |     |     |     |     |     |     |   |
|------------------------------------------------------------|-----|-----|-----|-----|-----|-----|-----|---|
| Asbestosis                                                 | 0   | 0   | 0   | 0   | 0   | 0   | 0   | 0 |
| Ascariasis                                                 | 0   | 4   | 0   | 8   | 0   | 1   | 22  | 0 |
| Asthma                                                     | 455 | 416 | 301 | 212 | 148 | 274 | 210 | 5 |
| Atopic dermatitis                                          | 250 | 208 | 183 | 80  | 396 | 96  | 160 | 1 |
| Atrial fibrillation and flutter                            | 0   | 0   | 0   | 0   | 0   | 0   | 0   | 0 |
| Attention-deficit/hyperactivity disorder                   | 65  | 37  | 42  | 12  | 21  | 11  | 21  | 1 |
| Autism spectrum disorders                                  | 80  | 66  | 112 | 71  | 75  | 70  | 66  | 0 |
| Benign and in situ cervical and uterine neoplasms          | 0   | 0   | 0   | 0   | 0   | 0   | 0   | 0 |
| Benign and in situ intestinal neoplasms                    | 0   | 0   | 0   | 0   | 0   | 0   | 0   | 0 |
| Benign prostatic hyperplasia                               | 0   | 0   | 0   | 0   | 0   | 0   | 0   | 0 |
| Bipolar disorder                                           | 37  | 34  | 31  | 13  | 10  | 12  | 12  | 3 |
| Bladder cancer                                             | 0   | 0   | 0   | 0   | 0   | 0   | 0   | 0 |
| Brain and central nervous system cancer                    | 70  | 139 | 75  | 54  | 93  | 35  | 85  | 0 |
| Breast cancer                                              | 0   | 0   | 0   | 0   | 0   | 0   | 0   | 0 |
| Bulimia nervosa                                            | 18  | 4   | 10  | 3   | 4   | 4   | 4   | 0 |
| Cannabis use disorders                                     | 3   | 1   | 6   | 0   | 1   | 0   | 1   | 0 |
| Caries of deciduous teeth                                  | 9   | 11  | 9   | 11  | 12  | 10  | 10  | 0 |
| Caries of permanent teeth                                  | 10  | 12  | 11  | 10  | 14  | 11  | 13  | 0 |
| Cataract                                                   | 0   | 0   | 0   | 0   | 0   | 0   | 0   | 0 |
| Cellulitis                                                 | 3   | 9   | 4   | 3   | 3   | 3   | 3   | 0 |
| Cervical cancer                                            | 0   | 0   | 0   | 0   | 0   | 0   | 0   | 0 |
| Chagas disease                                             | 0   | 1   | 0   | 0   | 0   | 0   | 0   | 0 |
| Chlamydial infection                                       | 0   | 0   | 0   | 0   | 0   | 0   | 0   | 0 |
| Chronic kidney disease due to diabetes mellitus type 1     | 0   | 1   | 0   | 1   | 1   | 2   | 2   | 0 |
| Chronic kidney disease due to diabetes mellitus type 2     | 0   | 0   | 0   | 0   | 0   | 0   | 0   | 0 |
| Chronic kidney disease due to glomerulonephritis           | 4   | 24  | 8   | 25  | 19  | 25  | 32  | 0 |
| Chronic kidney disease due to hypertension                 | 0   | 0   | 0   | 0   | 0   | 0   | 0   | 0 |
| Chronic kidney disease due to other and unspecified causes | 8   | 41  | 16  | 31  | 30  | 46  | 59  | 0 |

Volodina et al., Public health relevance of medicines developed under paediatric legislation in Europe and the United States: a systematic mapping study

|                                                                |     |      |     |      |     |      |      |   |
|----------------------------------------------------------------|-----|------|-----|------|-----|------|------|---|
| Chronic lymphoid leukemia                                      | 0   | 0    | 0   | 0    | 0   | 0    | 0    | 0 |
| Chronic myeloid leukemia                                       | 1   | 1    | 1   | 7    | 1   | 1    | 8    | 3 |
| Chronic obstructive pulmonary disease                          | 9   | 12   | 8   | 26   | 11  | 25   | 22   | 0 |
| Cirrhosis and other chronic liver diseases due to alcohol use  | 0   | 0    | 0   | 0    | 0   | 0    | 0    | 0 |
| Cirrhosis and other chronic liver diseases due to hepatitis B  | 0   | 0    | 0   | 1    | 0   | 0    | 1    | 0 |
| Cirrhosis and other chronic liver diseases due to hepatitis C  | 0   | 1    | 0   | 1    | 0   | 0    | 2    | 0 |
| Cirrhosis and other chronic liver diseases due to NAFLD        | 0   | 0    | 0   | 0    | 0   | 0    | 0    | 0 |
| Cirrhosis and other chronic liver diseases due to other causes | 2   | 22   | 4   | 47   | 11  | 22   | 71   | 0 |
| Coal workers pneumoconiosis                                    | 0   | 0    | 0   | 0    | 0   | 0    | 0    | 0 |
| Cocaine use disorders                                          | 1   | 1    | 1   | 0    | 0   | 0    | 0    | 0 |
| Colon and rectum cancer                                        | 1   | 2    | 1   | 1    | 1   | 2    | 2    | 0 |
| Conduct disorder                                               | 193 | 181  | 157 | 194  | 187 | 193  | 172  | 0 |
| Congenital heart anomalies                                     | 172 | 1185 | 197 | 546  | 369 | 415  | 866  | 0 |
| Congenital musculoskeletal and limb anomalies                  | 90  | 103  | 75  | 106  | 83  | 144  | 107  | 0 |
| Contact dermatitis                                             | 2   | 4    | 16  | 4    | 16  | 4    | 5    | 0 |
| Cutaneous and mucocutaneous leishmaniasis                      | 0   | 1    | 0   | 0    | 0   | 0    | 2    | 0 |
| Cystic echinococcosis                                          | 0   | 0    | 0   | 2    | 1   | 0    | 1    | 0 |
| Cysticercosis                                                  | 0   | 1    | 0   | 1    | 0   | 1    | 0    | 0 |
| Decubitus ulcer                                                | 0   | 1    | 0   | 0    | 0   | 0    | 0    | 0 |
| Dengue                                                         | 2   | 20   | 0   | 4    | 0   | 0    | 54   | 0 |
| Diabetes mellitus type 1                                       | 12  | 24   | 15  | 20   | 11  | 19   | 26   | 5 |
| Diabetes mellitus type 2                                       | 0   | 0    | 0   | 0    | 0   | 0    | 0    | 5 |
| Diarrheal diseases                                             | 76  | 561  | 138 | 4147 | 226 | 2431 | 2636 | 2 |
| Dietary iron deficiency                                        | 104 | 368  | 39  | 395  | 91  | 323  | 695  | 0 |
| Digestive congenital anomalies                                 | 59  | 372  | 63  | 155  | 118 | 115  | 215  | 0 |
| Diphtheria                                                     | 0   | 0    | 0   | 4    | 0   | 4    | 18   | 4 |
| Down syndrome                                                  | 45  | 164  | 46  | 44   | 35  | 102  | 72   | 0 |
| Drug-susceptible tuberculosis                                  | 1   | 25   | 1   | 213  | 9   | 587  | 285  | 0 |

## Volodina et al., Public health relevance of medicines developed under paediatric legislation in Europe and the United States: a systematic mapping study

|                                                   |     |     |     |      |     |      |     |    |
|---------------------------------------------------|-----|-----|-----|------|-----|------|-----|----|
| Dysthymia                                         | 11  | 7   | 12  | 11   | 7   | 9    | 9   | 0  |
| Ebola                                             | 0   | 0   | 0   | 0    | 0   | 0    | 2   | 0  |
| Edentulism                                        | 0   | 0   | 0   | 0    | 0   | 0    | 0   | 0  |
| Encephalitis                                      | 9   | 28  | 9   | 19   | 60  | 15   | 121 | 1  |
| Endocarditis                                      | 1   | 15  | 1   | 5    | 3   | 5    | 10  | 0  |
| Endocrine, metabolic, blood, and immune disorders | 167 | 161 | 134 | 79   | 154 | 186  | 159 | 29 |
| Endometriosis                                     | 0   | 0   | 0   | 0    | 0   | 0    | 0   | 0  |
| Esophageal cancer                                 | 0   | 0   | 0   | 0    | 0   | 0    | 0   | 0  |
| Extensively drug-resistant tuberculosis           | 0   | 0   | 0   | 0    | 2   | 0    | 1   | 0  |
| Female infertility                                | 0   | 0   | 0   | 0    | 0   | 0    | 0   | 0  |
| Food-borne trematodiasis                          | 0   | 0   | 0   | 0    | 1   | 0    | 1   | 0  |
| Fungal skin diseases                              | 20  | 26  | 7   | 64   | 15  | 36   | 45  | 2  |
| G6PD deficiency                                   | 0   | 12  | 2   | 1    | 1   | 7    | 5   | 0  |
| G6PD trait                                        | 0   | 0   | 0   | 0    | 0   | 0    | 0   | 0  |
| Gallbladder and biliary diseases                  | 3   | 9   | 4   | 5    | 7   | 5    | 9   | 0  |
| Gallbladder and biliary tract cancer              | 0   | 0   | 0   | 0    | 0   | 0    | 0   | 0  |
| Gastritis and duodenitis                          | 3   | 5   | 2   | 6    | 6   | 10   | 10  | 0  |
| Gastroesophageal reflux disease                   | 1   | 2   | 1   | 1    | 1   | 1    | 1   | 3  |
| Genital herpes                                    | 0   | 0   | 0   | 0    | 0   | 0    | 0   | 0  |
| Genital prolapse                                  | 0   | 0   | 0   | 0    | 0   | 0    | 0   | 0  |
| Glaucoma                                          | 0   | 0   | 0   | 0    | 0   | 0    | 0   | 0  |
| Gonococcal infection                              | 0   | 0   | 0   | 0    | 0   | 0    | 0   | 0  |
| Gout                                              | 0   | 0   | 0   | 0    | 0   | 0    | 0   | 0  |
| Guinea worm disease                               | 0   | 0   | 0   | 0    | 0   | 0    | 0   | 0  |
| Hemolytic disease and other neonatal jaundice     | 3   | 52  | 3   | 113  | 33  | 113  | 252 | 0  |
| HIV/AIDS                                          | 2   | 79  | 4   | 1875 | 150 | 3072 | 338 | 15 |
| Hodgkin lymphoma                                  | 1   | 3   | 1   | 6    | 3   | 2    | 7   | 0  |
| Hookworm disease                                  | 0   | 4   | 0   | 19   | 0   | 16   | 19  | 0  |

Volodina et al., Public health relevance of medicines developed under paediatric legislation in Europe and the United States: a systematic mapping study

|                                                     |     |     |     |      |     |      |      |    |
|-----------------------------------------------------|-----|-----|-----|------|-----|------|------|----|
| Hypertensive heart disease                          | 0   | 0   | 0   | 0    | 0   | 0    | 0    | 7  |
| Idiopathic developmental intellectual disability    | 16  | 20  | 27  | 41   | 25  | 20   | 81   | 0  |
| Idiopathic epilepsy                                 | 89  | 167 | 64  | 207  | 84  | 183  | 180  | 10 |
| Inflammatory bowel disease                          | 3   | 3   | 7   | 4    | 2   | 5    | 4    | 4  |
| Inguinal, femoral, and abdominal hernia             | 9   | 31  | 9   | 33   | 46  | 53   | 36   | 0  |
| Interstitial lung disease and pulmonary sarcoidosis | 2   | 4   | 4   | 2    | 2   | 3    | 3    | 0  |
| Intracerebral hemorrhage                            | 3   | 12  | 4   | 22   | 6   | 14   | 46   | 0  |
| Invasive Non-typhoidal Salmonella (iNTS)            | 0   | 3   | 0   | 712  | 1   | 113  | 276  | 0  |
| Iodine deficiency                                   | 1   | 0   | 1   | 3    | 2   | 2    | 12   | 0  |
| Ischemic heart disease                              | 0   | 0   | 0   | 0    | 0   | 0    | 0    | 0  |
| Ischemic stroke                                     | 8   | 9   | 12  | 25   | 14  | 23   | 22   | 0  |
| Kidney cancer                                       | 8   | 22  | 7   | 4    | 13  | 10   | 12   | 0  |
| Klinefelter syndrome                                | 0   | 0   | 0   | 0    | 0   | 0    | 0    | 0  |
| Larynx cancer                                       | 0   | 0   | 0   | 0    | 0   | 0    | 0    | 0  |
| Latent tuberculosis infection                       | 0   | 0   | 0   | 0    | 0   | 0    | 0    | 0  |
| Leprosy                                             | 0   | 0   | 0   | 0    | 0   | 0    | 0    | 0  |
| Lip and oral cavity cancer                          | 1   | 1   | 1   | 1    | 1   | 1    | 1    | 0  |
| Liver cancer due to alcohol use                     | 0   | 0   | 0   | 0    | 0   | 0    | 0    | 0  |
| Liver cancer due to hepatitis B                     | 0   | 0   | 0   | 1    | 1   | 0    | 1    | 0  |
| Liver cancer due to hepatitis C                     | 0   | 0   | 0   | 0    | 0   | 0    | 0    | 0  |
| Liver cancer due to NASH                            | 0   | 0   | 0   | 0    | 0   | 0    | 0    | 0  |
| Liver cancer due to other causes                    | 6   | 7   | 7   | 5    | 13  | 4    | 13   | 0  |
| Low back pain                                       | 109 | 137 | 133 | 71   | 148 | 65   | 100  | 0  |
| Lower respiratory infections                        | 62  | 997 | 57  | 3119 | 397 | 2527 | 3196 | 14 |
| Lymphatic filariasis                                | 0   | 3   | 0   | 24   | 0   | 0    | 14   | 0  |
| Major depressive disorder                           | 135 | 178 | 91  | 47   | 28  | 42   | 57   | 1  |
| Malaria                                             | 0   | 7   | 0   | 2450 | 0   | 40   | 1820 | 2  |
| Male infertility                                    | 0   | 0   | 0   | 0    | 0   | 0    | 0    | 0  |

Volodina et al., Public health relevance of medicines developed under paediatric legislation in Europe and the United States: a systematic mapping study

|                                                                        |     |      |     |      |     |      |      |   |
|------------------------------------------------------------------------|-----|------|-----|------|-----|------|------|---|
| Malignant skin melanoma                                                | 5   | 2    | 2   | 1    | 2   | 1    | 1    | 1 |
| Maternal disorders                                                     | 0   | 3    | 0   | 5    | 0   | 0    | 4    | 0 |
| Measles                                                                | 0   | 0    | 0   | 196  | 0   | 281  | 349  | 0 |
| Meningitis                                                             | 24  | 146  | 24  | 600  | 59  | 261  | 604  | 7 |
| Mesothelioma                                                           | 0   | 0    | 0   | 0    | 0   | 0    | 0    | 0 |
| Migraine                                                               | 132 | 417  | 176 | 89   | 133 | 127  | 165  | 3 |
| Motor neuron disease                                                   | 25  | 7    | 13  | 1    | 4   | 1    | 4    | 0 |
| Multidrug-resistant tuberculosis without extensive drug resistance     | 0   | 1    | 0   | 7    | 4   | 33   | 25   | 0 |
| Multiple myeloma                                                       | 0   | 0    | 0   | 0    | 0   | 0    | 0    | 0 |
| Multiple sclerosis                                                     | 0   | 0    | 1   | 0    | 0   | 0    | 0    | 1 |
| Myelodysplastic, myeloproliferative, and other hematopoietic neoplasms | 1   | 5    | 4   | 1    | 2   | 1    | 2    | 0 |
| Myocarditis                                                            | 8   | 17   | 8   | 5    | 7   | 4    | 12   | 0 |
| Nasopharynx cancer                                                     | 1   | 1    | 1   | 2    | 1   | 1    | 2    | 0 |
| Near vision loss                                                       | 0   | 0    | 0   | 0    | 0   | 1    | 0    | 0 |
| Neck pain                                                              | 10  | 8    | 18  | 7    | 8   | 7    | 13   | 0 |
| Neonatal encephalopathy due to birth asphyxia and trauma               | 346 | 1313 | 327 | 3220 | 355 | 2341 | 2625 | 0 |
| Neonatal preterm birth                                                 | 513 | 2240 | 791 | 2250 | 482 | 4103 | 3182 | 0 |
| Neonatal sepsis and other neonatal infections                          | 33  | 1077 | 68  | 1621 | 288 | 1157 | 1093 | 2 |
| Neural tube defects                                                    | 79  | 324  | 60  | 258  | 76  | 146  | 383  | 0 |
| Non-Hodgkin lymphoma                                                   | 9   | 26   | 11  | 27   | 17  | 15   | 25   | 0 |
| Non-melanoma skin cancer (basal-cell carcinoma)                        | 0   | 0    | 0   | 0    | 0   | 0    | 0    | 0 |
| Non-melanoma skin cancer (squamous-cell carcinoma)                     | 0   | 0    | 0   | 0    | 0   | 0    | 0    | 0 |
| Non-rheumatic calcific aortic valve disease                            | 0   | 0    | 0   | 0    | 0   | 0    | 0    | 0 |
| Non-rheumatic degenerative mitral valve disease                        | 0   | 0    | 0   | 0    | 0   | 0    | 0    | 0 |
| Onchocerciasis                                                         | 0   | 0    | 0   | 0    | 0   | 0    | 11   | 0 |
| Opioid use disorders                                                   | 0   | 0    | 0   | 0    | 0   | 0    | 0    | 0 |
| Orofacial clefts                                                       | 3   | 9    | 1   | 14   | 3   | 17   | 17   | 0 |

Volodina et al., Public health relevance of medicines developed under paediatric legislation in Europe and the United States: a systematic mapping study

|                                                |     |      |     |      |     |      |      |    |
|------------------------------------------------|-----|------|-----|------|-----|------|------|----|
| Osteoarthritis hand                            | 0   | 0    | 0   | 0    | 0   | 0    | 0    | 0  |
| Osteoarthritis hip                             | 0   | 0    | 0   | 0    | 0   | 0    | 0    | 0  |
| Osteoarthritis knee                            | 0   | 0    | 0   | 0    | 0   | 0    | 0    | 0  |
| Osteoarthritis other                           | 0   | 0    | 0   | 0    | 0   | 0    | 0    | 0  |
| Other benign and in situ neoplasms             | 0   | 0    | 0   | 0    | 0   | 0    | 0    | 2  |
| Other cardiomyopathy                           | 8   | 74   | 14  | 47   | 25  | 49   | 32   | 0  |
| Other cardiovascular and circulatory diseases  | 13  | 45   | 14  | 41   | 13  | 29   | 58   | 0  |
| Other chromosomal abnormalities                | 112 | 178  | 166 | 59   | 78  | 127  | 95   | 0  |
| Other chronic respiratory diseases             | 13  | 30   | 14  | 34   | 13  | 38   | 32   | 8  |
| Other congenital birth defects                 | 132 | 659  | 170 | 519  | 320 | 561  | 589  | 2  |
| Other digestive diseases                       | 3   | 11   | 4   | 16   | 9   | 11   | 16   | 1  |
| Other drug use disorders                       | 0   | 0    | 1   | 0    | 0   | 0    | 0    | 0  |
| Other gynecological diseases                   | 0   | 1    | 0   | 1    | 0   | 1    | 1    | 1  |
| Other hemoglobinopathies and hemolytic anemias | 4   | 17   | 2   | 15   | 4   | 13   | 26   | 3  |
| Other intestinal infectious diseases           | 0   | 2    | 0   | 4    | 1   | 3    | 5    | 4  |
| Other leukemia                                 | 3   | 20   | 11  | 38   | 5   | 25   | 43   | 0  |
| Other malignant neoplasms                      | 56  | 108  | 76  | 82   | 73  | 48   | 120  | 1  |
| Other mental disorders                         | 3   | 1    | 3   | 1    | 1   | 1    | 2    | 1  |
| Other musculoskeletal disorders                | 7   | 15   | 65  | 2    | 3   | 2    | 10   | 1  |
| Other neglected tropical diseases              | 10  | 53   | 4   | 42   | 14  | 33   | 101  | 0  |
| Other neonatal disorders                       | 245 | 1226 | 354 | 1797 | 299 | 2955 | 1731 | 0  |
| Other neurological disorders                   | 57  | 76   | 59  | 75   | 75  | 68   | 71   | 1  |
| Other non-rheumatic valve diseases             | 0   | 0    | 0   | 0    | 0   | 0    | 0    | 0  |
| Other nutritional deficiencies                 | 2   | 10   | 3   | 9    | 6   | 6    | 31   | 0  |
| Other oral disorders                           | 31  | 32   | 31  | 32   | 32  | 32   | 31   | 1  |
| Other pharynx cancer                           | 0   | 0    | 0   | 0    | 0   | 0    | 0    | 0  |
| Other pneumoconiosis                           | 0   | 0    | 0   | 0    | 0   | 0    | 0    | 0  |
| Other sense organ diseases                     | 15  | 15   | 13  | 15   | 13  | 15   | 14   | 10 |

## Volodina et al., Public health relevance of medicines developed under paediatric legislation in Europe and the United States: a systematic mapping study

|                                            |    |     |    |      |    |     |     |   |
|--------------------------------------------|----|-----|----|------|----|-----|-----|---|
| Other sexually transmitted infections      | 0  | 0   | 0  | 0    | 0  | 0   | 0   | 2 |
| Other skin and subcutaneous diseases       | 23 | 24  | 23 | 20   | 22 | 22  | 23  | 1 |
| Other unspecified infectious diseases      | 37 | 70  | 26 | 104  | 93 | 290 | 138 | 6 |
| Other urinary diseases                     | 3  | 4   | 3  | 17   | 4  | 7   | 11  | 1 |
| Other vision loss                          | 5  | 8   | 4  | 4    | 4  | 3   | 5   | 2 |
| Otitis media                               | 26 | 49  | 26 | 57   | 46 | 55  | 51  | 2 |
| Ovarian cancer                             | 1  | 2   | 1  | 1    | 2  | 2   | 2   | 0 |
| Pancreatic cancer                          | 0  | 0   | 0  | 0    | 0  | 0   | 0   | 0 |
| Pancreatitis                               | 1  | 2   | 1  | 1    | 2  | 0   | 2   | 0 |
| Paralytic ileus and intestinal obstruction | 13 | 91  | 16 | 84   | 21 | 39  | 103 | 0 |
| Paratyphoid fever                          | 0  | 0   | 0  | 16   | 0  | 0   | 50  | 0 |
| Parkinson's disease                        | 0  | 0   | 0  | 0    | 0  | 0   | 0   | 0 |
| Peptic ulcer disease                       | 0  | 2   | 1  | 5    | 2  | 2   | 10  | 0 |
| Periodontal diseases                       | 0  | 0   | 0  | 0    | 0  | 0   | 0   | 0 |
| Peripheral artery disease                  | 0  | 0   | 0  | 0    | 0  | 0   | 0   | 0 |
| Polycystic ovarian syndrome                | 2  | 0   | 1  | 0    | 0  | 0   | 1   | 0 |
| Premenstrual syndrome                      | 20 | 23  | 22 | 24   | 21 | 21  | 21  | 0 |
| Prostate cancer                            | 0  | 0   | 0  | 0    | 0  | 0   | 0   | 0 |
| Protein-energy malnutrition                | 10 | 194 | 10 | 1188 | 36 | 802 | 555 | 1 |
| Pruritus                                   | 4  | 5   | 5  | 8    | 5  | 7   | 5   | 0 |
| Psoriasis                                  | 52 | 32  | 41 | 6    | 13 | 9   | 15  | 2 |
| Pyoderma                                   | 6  | 24  | 2  | 23   | 5  | 15  | 21  | 4 |
| Rabies                                     | 0  | 0   | 0  | 15   | 0  | 3   | 21  | 0 |
| Refraction disorders                       | 46 | 54  | 27 | 17   | 39 | 18  | 31  | 0 |
| Rheumatic heart disease                    | 2  | 28  | 1  | 38   | 2  | 32  | 36  | 0 |
| Rheumatoid arthritis                       | 1  | 2   | 2  | 1    | 1  | 1   | 1   | 7 |
| Scabies                                    | 6  | 162 | 5  | 54   | 13 | 31  | 76  | 0 |
| Schistosomiasis                            | 0  | 10  | 0  | 68   | 0  | 37  | 14  | 0 |



Volodina et al., Public health relevance of medicines developed under paediatric legislation in Europe and the United States: a systematic mapping study

|                                                     |     |      |     |     |      |      |      |   |
|-----------------------------------------------------|-----|------|-----|-----|------|------|------|---|
| Schizophrenia                                       | 2   | 2    | 1   | 2   | 2    | 2    | 2    | 5 |
| Seborrhoeic dermatitis                              | 2   | 2    | 2   | 3   | 1    | 3    | 3    | 0 |
| Self-harm and interpersonal violence                | 70  | 279  | 90  | 133 | 171  | 321  | 240  | 1 |
| Sickle cell disorders                               | 0   | 31   | 1   | 82  | 0    | 3    | 122  | 0 |
| Sickle cell trait                                   | 1   | 6    | 0   | 86  | 0    | 2    | 43   | 0 |
| Silicosis                                           | 0   | 0    | 0   | 0   | 0    | 0    | 0    | 0 |
| Stomach cancer                                      | 0   | 0    | 0   | 0   | 0    | 0    | 0    | 0 |
| Subarachnoid hemorrhage                             | 3   | 21   | 5   | 4   | 6    | 3    | 18   | 0 |
| Sudden infant death syndrome                        | 102 | 45   | 68  | 87  | 102  | 135  | 125  | 0 |
| Syphilis                                            | 0   | 37   | 0   | 419 | 2    | 1321 | 371  | 0 |
| Tension-type headache                               | 13  | 18   | 17  | 11  | 17   | 12   | 13   | 0 |
| Testicular cancer                                   | 4   | 3    | 4   | 1   | 3    | 3    | 3    | 0 |
| Tetanus                                             | 0   | 2    | 0   | 384 | 0    | 3    | 89   | 4 |
| Thalasseмии                                         | 4   | 6    | 2   | 0   | 9    | 5    | 28   | 0 |
| Thalasseмии trait                                   | 3   | 7    | 0   | 5   | 8    | 5    | 56   | 0 |
| Thyroid cancer                                      | 1   | 1    | 1   | 1   | 1    | 1    | 1    | 1 |
| Tracheal, bronchus, and lung cancer                 | 1   | 1    | 1   | 0   | 0    | 0    | 1    | 0 |
| Trachoma                                            | 0   | 0    | 0   | 0   | 0    | 0    | 0    | 0 |
| Transport and other unintentional injuries          | 683 | 1168 | 435 | 825 | 1085 | 1432 | 1482 | 0 |
| Trichomoniasis                                      | 0   | 0    | 0   | 0   | 0    | 0    | 0    | 0 |
| Trichuriasis                                        | 0   | 4    | 0   | 3   | 0    | 4    | 4    | 0 |
| Turner syndrome                                     | 0   | 0    | 0   | 0   | 0    | 0    | 0    | 0 |
| Typhoid fever                                       | 0   | 0    | 0   | 359 | 0    | 3    | 275  | 0 |
| Upper respiratory infections                        | 132 | 154  | 144 | 154 | 100  | 106  | 114  | 0 |
| Urinary tract infections and interstitial nephritis | 5   | 48   | 5   | 7   | 10   | 4    | 23   | 0 |
| Urogenital congenital anomalies                     | 28  | 84   | 29  | 33  | 25   | 26   | 50   | 0 |
| Urolithiasis                                        | 0   | 0    | 0   | 0   | 1    | 0    | 0    | 0 |
| Urticaria                                           | 71  | 80   | 88  | 80  | 133  | 81   | 80   | 2 |

Volodina et al., Public health relevance of medicines developed under paediatric legislation in Europe and the United States: a systematic mapping study

|                               |     |     |     |     |     |     |     |   |
|-------------------------------|-----|-----|-----|-----|-----|-----|-----|---|
| Uterine cancer                | 0   | 0   | 0   | 0   | 0   | 0   | 0   | 0 |
| Uterine fibroids              | 0   | 0   | 0   | 0   | 1   | 0   | 0   | 0 |
| Varicella and herpes zoster   | 4   | 27  | 3   | 36  | 8   | 19  | 30  | 1 |
| Vascular intestinal disorders | 1   | 2   | 1   | 1   | 2   | 1   | 2   | 0 |
| Viral skin diseases           | 204 | 105 | 326 | 175 | 104 | 121 | 122 | 0 |
| Visceral leishmaniasis        | 0   | 70  | 0   | 49  | 0   | 0   | 14  | 0 |
| Vitamin A deficiency          | 0   | 29  | 1   | 110 | 0   | 22  | 51  | 0 |
| Whooping cough                | 4   | 17  | 7   | 478 | 1   | 593 | 515 | 4 |
| Yellow fever                  | 0   | 0   | 0   | 6   | 0   | 0   | 8   | 0 |
| Zika virus                    | 0   | 0   | 0   | 0   | 0   | 0   | 0   | 0 |
