# Supplementary material for: Public health relevance of medicines developed under paediatric legislation in Europe and the USA: a systematic mapping study
Source: PubMed Central journal article supplement — BMJ Paediatr Open. 2024 Apr 2;8(1):e002455. doi: 10.1136/bmjpo-2023-002455 (PMC10989171; doi:10.1136/bmjpo-2023-002455), 2024-04-02
Supplement: bmjpo-2023-002455supp002.pdf [file bmjpo-2023-002455supp002.pdf]

Volodina et al., Public health relevance of medicines developed under paediatric legislation in Europe and the United States: a systematic mapping study

**Supplement 2. Paediatric indications not mapped with Disability Adjusted Life Year cause**

| N | Approved indication in EU/US                                                                                                                                                                  | Assigned ICD 10 classification                                                 |
|---|-----------------------------------------------------------------------------------------------------------------------------------------------------------------------------------------------|--------------------------------------------------------------------------------|
| 1 | Maintenance of anesthesia in non-intubated patients                                                                                                                                           | Z00-Z13 Persons encountering health services for examination and investigation |
| 2 | Adjunct to general anesthesia                                                                                                                                                                 |                                                                                |
| 3 | Contrast agent for intravenous use with magnetic resonance imaging                                                                                                                            |                                                                                |
| 4 | Diagnostic evaluation of tissue pathologies with contrast-enhanced magnetic resonance imaging                                                                                                 |                                                                                |
| 5 | Emergency contraception within 120 hours (5 days) of unprotected sexual intercourse or contraceptive failure                                                                                  | Z30 Contraceptive management                                                   |
| 6 | Oral contraception                                                                                                                                                                            |                                                                                |
| 7 | Management of mild to moderate pain and the management of moderate to severe pain as an adjunct to opioid analgesics, and for the reduction of fever in pediatric patients 6 months and older | R52 Pain, not elsewhere classified                                             |
| 8 | Management of pain severe enough to require daily, around the-clock, long-term opioid treatment in pediatric patients 11 years and older                                                      |                                                                                |
